# Supplementary material
Source: PubMed Central journal article supplement (PMC3602444)
Supplement: NIHMS245011-supplement-Suppl_1.pdf [file NIHMS245011-supplement-Suppl_1.pdf]

# Supporting Online Material for

## **Bacterial Community Variation in Human Body Habitats Across Space and Time**

Elizabeth K. Costello, Christian L. Lauber, Micah Hamady, Noah Fierer, Jeffrey I. Gordon, Rob Knight\*

\*To whom correspondence should be addressed. E-mail: [rob.knight@colorado.edu](mailto:rob.knight@colorado.edu)

### **This file includes:**

Materials and Methods

Results

Figs. S1 to S22

Table S1

References S1 to S20

## **Materials and Methods**

**Sample collection.** Healthy adults were recruited to donate samples on two consecutive days in June and again three months later on two consecutive days in September 2008. Volunteers were unrelated individuals of both sexes and most lived in Boulder, CO. Female subjects F1, F2, F3 and male subjects M1, M2, M3, M4, and M6 were 30-35 years old. Subject M5 was approximately 60 years old. The health status of the volunteers was self-reported. None of the volunteers indicated that they had been hospitalized in the previous 6 months. All individuals were made aware of the nature of the experiment and gave written informed consent in accordance with the sampling protocol approved by the University of Colorado Human Research Committee (protocol 0708.12). On the day of sampling, participants were instructed to bathe in the morning using their choice of personal hygiene products, but to avoid wearing deodorant or antiperspirant. The interval between subject bathing and the collection of most samples likely ranged from around several hours to half an hour. Participants were asked to avoid eating or drinking for one hour prior to oral sampling. Skin surfaces, hair on top of the head, and nostrils (nares) were sampled using autoclaved cotton-tipped swabs (Puritan) pre-moistened with a sterile solution of 0.15 M NaCl and 0.1% Tween 20 (*S1*, *S2*). Swabbing has been shown to be a suitable method for skin sample collection for microbial community analysis (*S3*). Dry cotton-tipped swabs were used to sample the external auditory canal [and earwax (cerumen) if present], the dorsal surface of the tongue, and stool. Stool samples have been shown to provide an adequately representative sample of the gut microbiota (*S4*). Stool was swabbed using two different methods for comparison: i) off of used bathroom tissue and ii) by stabbing the swab

directly into the largest piece of feces (see Fig. S22 for comparison). We found that swabbing off of used bathroom tissue was adequate for obtaining material for microbial community analysis. Swabs were placed in sterile 15 ml plastic tubes and stored at -80°C within 10 minutes of sampling. Volunteers sampled stool on the same days that the other samples were collected (within 24 hours). If needed, the subjects were provided dry ice for the transport of their stool samples back to the lab. Liquid samples were also collected. The oral cavity was rinsed by swishing 10 ml of sterile water for 10 seconds, and then spitting the water into a sterile 50 ml plastic tube (see Fig. S22 for comparison to dorsal tongue swabs). Liquids were stored at 4°C for several hours before sterile filtration onto 0.2µm pore size cellulose-nitrate filters (Nalgene). Filtered samples were immediately placed at -80°C. Volunteers sampled themselves while wearing sterile gloves after first having their palms and index fingers swabbed by another person wearing sterile gloves. Replicate samples from the right and left sides of the body were taken when possible. All but one subject had not taken antibiotics in the 6 months prior to the June sampling dates, and none took antibiotics during the study period. Figure S1 lists the sample types, dates, and subjects. Samples were stored at -80°C for <1 week prior to DNA extraction.

We performed a follow-up study aimed at addressing whether skin location influences bacterial community assembly. Our approach involved transplanting foreign bacteria from various donor sites (dorsal tongue, forehead, and volar forearm) onto disinfected recipient skin sites (forehead and volar forearm) both within and between individuals. Four healthy participants (2 females and 2 males) who had given written consent to be re-contacted for follow-up sampling were recruited to donate samples on

two consecutive days in March 2009. All individuals were made aware of the nature of the experiment and gave written informed consent in accordance with the sampling protocol approved by the University of Colorado Human Research Committee (protocol 0109.23). The subjects had not taken antibiotics for at least six months. Participants were asked to bathe in the morning prior to sampling and to avoid applying lotions or other products to their skin. All samples and transplants were collected using autoclaved cotton-tipped swabs. For skin, the swab was pre-moistened in a saline solution (0.15 M NaCl and 0.1% Tween 20). Each day, participants received bacteria from themselves (i.e., bacteria transplanted from their own skin or tongue) and from another person (i.e., bacteria transplanted from another participant's skin or tongue). On day one, the non-self donor was the same sex as the recipient and on day two, the opposite sex. Grids were drawn on the participant's forehead and left volar forearm using an alcohol-resistant marker (VWR) and contained four sampling sites, each measuring 20 cm<sup>2</sup>. After taking initial samples from the sites and harvesting transplants, participants disinfected their skin in the area of the grids. Disinfection involved a 10 second scrub with liquid antibacterial soap (Dial) using an autoclaved mini-sponge and sterile water, followed by a sterile water rinse, a brief paper towel pat, a vigorous 10 second rub with an individually wrapped 70% v/v isopropanol pad (BD), a brief air dry, a once-over swab with 95% v/v ethanol, and a final air dry. We chose these chemicals because they are routinely used for skin disinfection and are not known to persist on skin surfaces for extended periods of time. Because it is very difficult to conclusively show that bacteria and/or their DNA are absent from a particular skin location, and because our disinfection protocol was not designed to remove DNA specifically, we did not perform a PCR-based test for the presence of

bacterial 16S rDNA on the recently disinfected skin sites. Immediately following disinfection, participants applied the bacterial transplants to their prepared skin by swabbing the appropriate site for 5-10 seconds. After transplantation, a sterile gauze pad was taped loosely over the sampling grid to prevent major disturbances. Post-transplant sampling occurred at 2, 4, and 8 hours. Participants and members of the research team wore gloves and surgical masks throughout the sampling period to prevent contamination while talking or handling swabs. All samples were placed at -80°C immediately following collection and were stored in this manner for <1 week prior to DNA extraction. Figure S14 provides an overview of the sampling procedure.

**DNA extraction.** Genomic DNA was extracted from all swabs and filters using the MO BIO PowerSoil DNA Isolation kit with modifications. The cotton tips of frozen swabs were broken off directly into bead tubes to which 60 µl of Solution C1 had been added. Frozen filters were packaged into bead tubes using sterile forceps. Tubes were incubated at 65°C for 10 minutes and then shaken horizontally at maximum speed for 2 minutes using the MO BIO vortex adapter. The remaining steps were performed as directed by the manufacturer. Extracted DNA was stored at -20°C.

**PCR amplification of the V2 region of bacterial 16S rRNA genes.** For each sample, we amplified 16S rRNA genes using a primer set described by Fierer et al. (S2) that had been optimized for the phylogenetic analysis of pyrosequencing reads (S5). The forward primer (5'-GCCTTGCCAGCCCGCTCAGTCAGAGTTTGATCCTGGCTCAG-3') contained the 454 Life Sciences primer B sequence, the broadly conserved bacterial primer 27F, and a two-base linker sequence ('TC'). The reverse primer (5'-GCCTCCCTCGCGCCATCAGNNNNNNNNNNNCATGCTGCCTCCCGTAGGAGT

-3') contained the 454 Life Sciences primer A sequence, a unique 12-nt error-correcting Golay barcode used to tag each PCR product (designated by NNNNNNNNNNNN), the broad-range bacterial primer 338R, and a 'CA' linker sequence inserted between the barcode and the rRNA primer. PCR reactions were carried out in triplicate 25  $\mu$ l reactions with 0.6  $\mu$ M forward and reverse primers, 3  $\mu$ l template DNA, and 1X of either Platinum PCR SuperMix (Invitrogen) or HotMasterMix (5 PRIME). All dilutions were carried out using certified DNA-free PCR water (MO BIO). PCR reactions were assembled within a PCR hood in which all surfaces and pipettes had been decontaminated with DNA AWAY (Molecular BioProducts) and UV irradiated for 30 minutes. Thermal cycling consisted of initial denaturation at 94°C for 3 minutes followed by 35 cycles of denaturation at 94°C for 45 seconds, annealing at 50°C for 30 seconds, and extension at 72°C for 90 seconds, with a final extension of 10 minutes at 72°C. Replicate amplicons were pooled and visualized on 1.0% agarose gels using SYBR Safe DNA gel stain in 0.5X TBE (Invitrogen). Amplicons were cleaned using the UltraClean-htp 96-well PCR Clean-up kit (MO BIO) according to the manufacturers instructions.

**Amplicon quantitation, pooling, and pyrosequencing.** Amplicon DNA concentrations were determined using the Quant-iT PicoGreen dsDNA reagent and kit (Invitrogen). Assays were carried out using 5-10  $\mu$ l of cleaned PCR product in a total reaction volume of 200  $\mu$ l in black, 96-well microtiter plates. Fluorescence was measured on a BioTek Synergy HT plate reader using the 480/520-nm excitation/emission filter pair. Following quantitation, cleaned amplicons were combined in equimolar ratios into a single tube. The final pool of DNA was precipitated on ice for 45 minutes following the addition of 5 M NaCl (0.2 M final concentration) and 2 volumes of ice-cold 100%

ethanol. The precipitated DNA was centrifuged at 7,800 x g for 40 minutes at 4°C, and the resulting pellet was washed with an equal volume of ice-cold 70% ethanol and centrifuged again at 7,800 x g for 20 minutes at 4°C. The supernatant was removed and the pellet was air dried for 10 minutes at room temperature and then resuspended in 100 µl of nuclease-free water (MO BIO). The final concentration of the pooled DNA was determined using a NanoDrop spectrophotometer (Thermo Fisher). Pyrosequencing was carried out using primer A on a 454 Life Sciences Genome Sequencer FLX instrument (Roche).

**Sequence analysis.** Sequences were processed and analyzed following the procedure described by Hamady et al. (S6). Sequences were removed from the analysis if they were <200 or >400 nt, had a quality score <25, contained ambiguous characters, contained an uncorrectable barcode, or did not contain the primer sequence. Remaining sequences were assigned to samples by examining the 12-nt barcode. Similar sequences were clustered into operational taxonomic units (OTUs, also called phylotypes) using cd-hit (S7) with a minimum coverage of 99% and a minimum identity of 97%. While estimates vary, error rates for the GS FLX sequencing instrument are generally reported to be lower than 3% (see paragraph below). A representative sequence was chosen from each OTU by selecting the longest sequence that had the largest number of hits to other sequences in the OTU. Representative sequences were aligned using NAST (S8) and the Greengenes database (S9) with a minimum alignment length of 150 and a minimum identity of 75%. The PH Lane mask was used to screen out hypervariable regions after alignment and includes (i.e., exports) 240 alignment positions between *E. coli* positions 27 – 338 of the Greengenes NAST alignment. Hypervariable regions were removed from

the analysis because they cannot be aligned with certainty across large phylogenetic distances. Following masking and compression, 198 alignment positions were used for phylogenetic inference. A phylogenetic tree was inferred using FastTree (*S10*) with Kimura's 2-parameter model: phylogenetic diversity (PD) results depending on this tree were confirmed by separate analyses in which reads were mapped using BLAST onto the Greengenes reference tree. Taxonomy was assigned using the RDP classifier with a minimum support threshold of 60% (*S11*) and the RDP taxonomic nomenclature.

**Quantifying and comparing diversity.** To evaluate the amount of diversity contained within communities (alpha diversity) we employed rarefaction plots and primarily branch length-based phylogenetic diversity measurements as described by Faith (*S12*), but also phylotype-based measures. To determine the amount of diversity shared between two communities (beta diversity) we employed the UniFrac metric (*S12-S15*). UniFrac distances are based on the fraction of branch length shared between two communities within a phylogenetic tree constructed from the 16S rRNA gene sequences from all communities being compared. With unweighted UniFrac, only the presence or absence of lineages is considered (community membership). With weighted UniFrac, branch lengths are weighted based on the relative abundances of lineages within communities (community structure). Phylotype-based measures of compositional dissimilarity were also used [primarily Kulczynski's quantitative symmetric measure (*S16*)]. Hierarchical clustering analysis of UniFrac or phylotype-based distances was performed using the unweighted pair group method with arithmetic mean (UPGMA). To control for sampling effort in beta diversity measurements, sequence counts per sample were capped in silico.



**Additional comments on sequencing error.** As mentioned above, error rates for GS FLX sequencing are generally reported to be lower than 3%, the cutoff used for defining phylotypes in our work. Quinlan et al. (S17) sequenced a known template and found that the error rate was 0.4% overall, but that 96% of these errors were insertions or deletions in homopolymer runs rather than nucleotide substitutions in high-complexity regions, leading to an error rate of 0.042%. Another recently published study estimated an error rate of 0.12% for non-homopolymeric regions and 0.27% in homopolymeric regions (S18) and yet another estimated rates of 0.24% and 0.97% for non-homopolymeric and homopolymeric regions, respectively (S19). Most errors are concentrated in a few exceptionally poor reads: thus the usual, conservative practice is to discard sequences that contain any errors in the primer (including the barcode, if present) and sequences where the average quality score is below 25 (S20), as performed here.

## Results

**Abundant taxa.** Of sequences detected in the gut (as assessed by sampling stool), 59.8% were Bacteroidetes [mainly *Bacteroides* spp. (42.6%)] and 35.2% were Firmicutes. In the oral cavity, the most abundant genera were *Streptococcus* (18.7%; Firmicutes), *Pasteurella* (15.9%;  $\gamma$  Proteobacteria), *Veillonella* (13.9%; Firmicutes), *Prevotella* (13.6%; Bacteroidetes), and *Neisseria* (9.9%;  $\beta$  Proteobacteria). Within the external auditory canal, co-dominant taxa included Firmicutes [Carnobacteriaceae (30.8%) and the genus *Staphylococcus* (24.1%)] and Actinobacteria [Propionibacterineae (20%) and Bifidobacteriales (19.2%)]. To varying degrees, the following groups were abundant on skin, hair and within nostrils: Actinobacteria (Propionibacterineae, Corynebacterineae, and Micrococcineae) and Firmicutes (*Staphylococcus* spp.) (Fig. S4).

**Figures**

|                       |                                 | Date                            |                          |                          |                | Habitat     |
|-----------------------|---------------------------------|---------------------------------|--------------------------|--------------------------|----------------|-------------|
|                       |                                 | June 17, 2008                   | June 18, 2008            | Sept. 17, 2008           | Sept. 18, 2008 |             |
| <b>Source or Site</b> | Forehead                        | Forehead                        | Forehead                 | Forehead                 | Skin           |             |
|                       | External nose                   | External nose                   |                          |                          |                |             |
|                       | Lateral pinna (right)           | Lateral pinna (right)           |                          |                          |                |             |
|                       | Lateral pinna (left)            | Lateral pinna (left)            |                          |                          |                |             |
|                       | Axilla (right)                  | Axilla (right)                  |                          |                          |                |             |
|                       | Axilla (left)                   | Axilla (left)                   |                          |                          |                |             |
|                       | Volar forearm (right)           | Volar forearm (right)           |                          |                          |                |             |
|                       | Volar forearm (left)            | Volar forearm (left)            |                          |                          |                |             |
|                       | Palm (right)                    | Palm (right)                    | Palm (right)             | Palm (right)             |                |             |
|                       | Palm (left)                     | Palm (left)                     | Palm (left)              | Palm (left)              |                |             |
|                       | Palmar index finger (right)     | Palmar index finger (right)     |                          |                          |                |             |
|                       | Palmar index finger (left)      | Palmar index finger (left)      |                          |                          |                |             |
|                       | Umbilicus                       | Umbilicus                       |                          |                          |                |             |
|                       | Glans penis or Labia minora     | Glans penis or Labia minora     |                          |                          |                |             |
|                       | Popliteal fossa (right)         | Popliteal fossa (right)         | Popliteal fossae         | Popliteal fossae         |                |             |
|                       | Popliteal fossa (left)          | Popliteal fossa (left)          |                          |                          |                |             |
|                       | Plantar foot (right)            | Plantar foot (right)            | Plantar foot (right)     | Plantar foot (right)     |                |             |
|                       | Plantar foot (left)             | Plantar foot (left)             | Plantar foot (left)      | Plantar foot (left)      |                |             |
|                       | Hair on head                    | Hair on head                    |                          |                          |                | Hair        |
|                       | Naris (right)                   | Naris (right)                   | Nares                    | Nares                    |                | Nostril     |
|                       | Naris (left)                    | Naris (left)                    |                          |                          |                |             |
|                       | External auditory canal (right) | External auditory canal (right) | External auditory canals | External auditory canals |                | EAC         |
|                       | External auditory canal (left)  | External auditory canal (left)  |                          |                          |                |             |
|                       | Dorsal tongue                   | Dorsal tongue                   | Dorsal tongue            | Dorsal tongue            |                | Oral cavity |
|                       | Oral cavity rinse               | Oral cavity rinse               |                          |                          |                |             |
|                       | Stool (swab)                    | Stool (swab)                    | Stool (swab)             | Stool (swab)             |                | Gut         |
| Stool (stab)          | Stool (stab)                    |                                 |                          |                          |                |             |

  

|               |    | Date          |               |                |                |
|---------------|----|---------------|---------------|----------------|----------------|
|               |    | June 17, 2008 | June 18, 2008 | Sept. 17, 2008 | Sept. 18, 2008 |
| <b>Person</b> | F1 | F1            | F1            | F1             |                |
|               | F2 | F2            | F2            | F2             |                |
|               | F3 | F3            | F3            | F3             |                |
|               | M1 | M1            | M1            | M1             |                |
|               | M2 | M2            | M2            | M2             |                |
|               | M3 | M3            | M3            | M3             |                |
|               | M4 | M4            | M4            | M4             |                |
|               |    |               | M5            | M5             |                |
|               |    |               | M6            | M6             |                |
|               |    |               |               |                |                |

  

| <b>Recipient</b> | <b>Day 1 donor</b> | <b>Day 2 donor</b> |
|------------------|--------------------|--------------------|
| F2               | self, F3           | self, M1           |
| F3               | self, F2           | self, M4           |
| M1               | self, M4           | self, F2           |
| M4               | self, M1           | self, F3           |

**Fig. S1.** Overview of samples obtained for this study. **(A)** Sources of microbiota collected on each date. Body habitat designations are listed at right. **(B)** People who donated microbiota on each date. Subject M2 used an antibiotic 2 weeks prior to the June sampling dates. Grey cells highlight the “core” data set: people who donated microbiota from the indicated sources on all dates and did not take antibiotics. **(C)** People listed in **(B)** who also participated in the skin surface community assembly study. F, female; M, male.

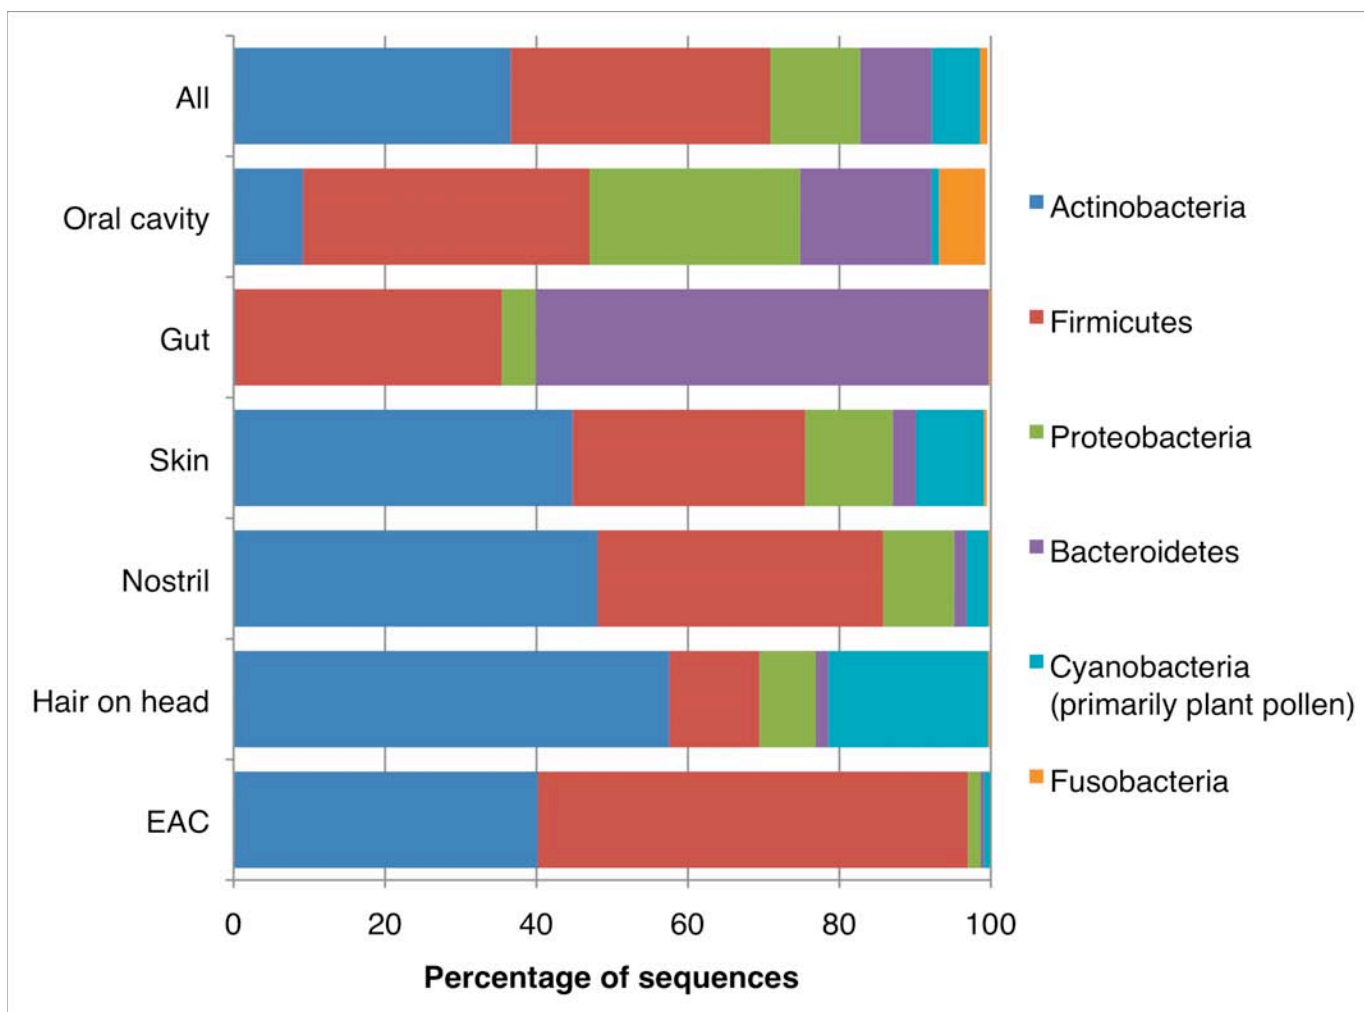

**Fig. S2.** Relative abundances of the 6 most abundant bacterial phyla in the human body habitats studied. Phyla shown represent 99.6% of sequences sampled. “Cyanobacteria” were primarily related to plant chloroplast sequences (i.e., pollen sampled from surfaces in June) derived from environmental exposures.

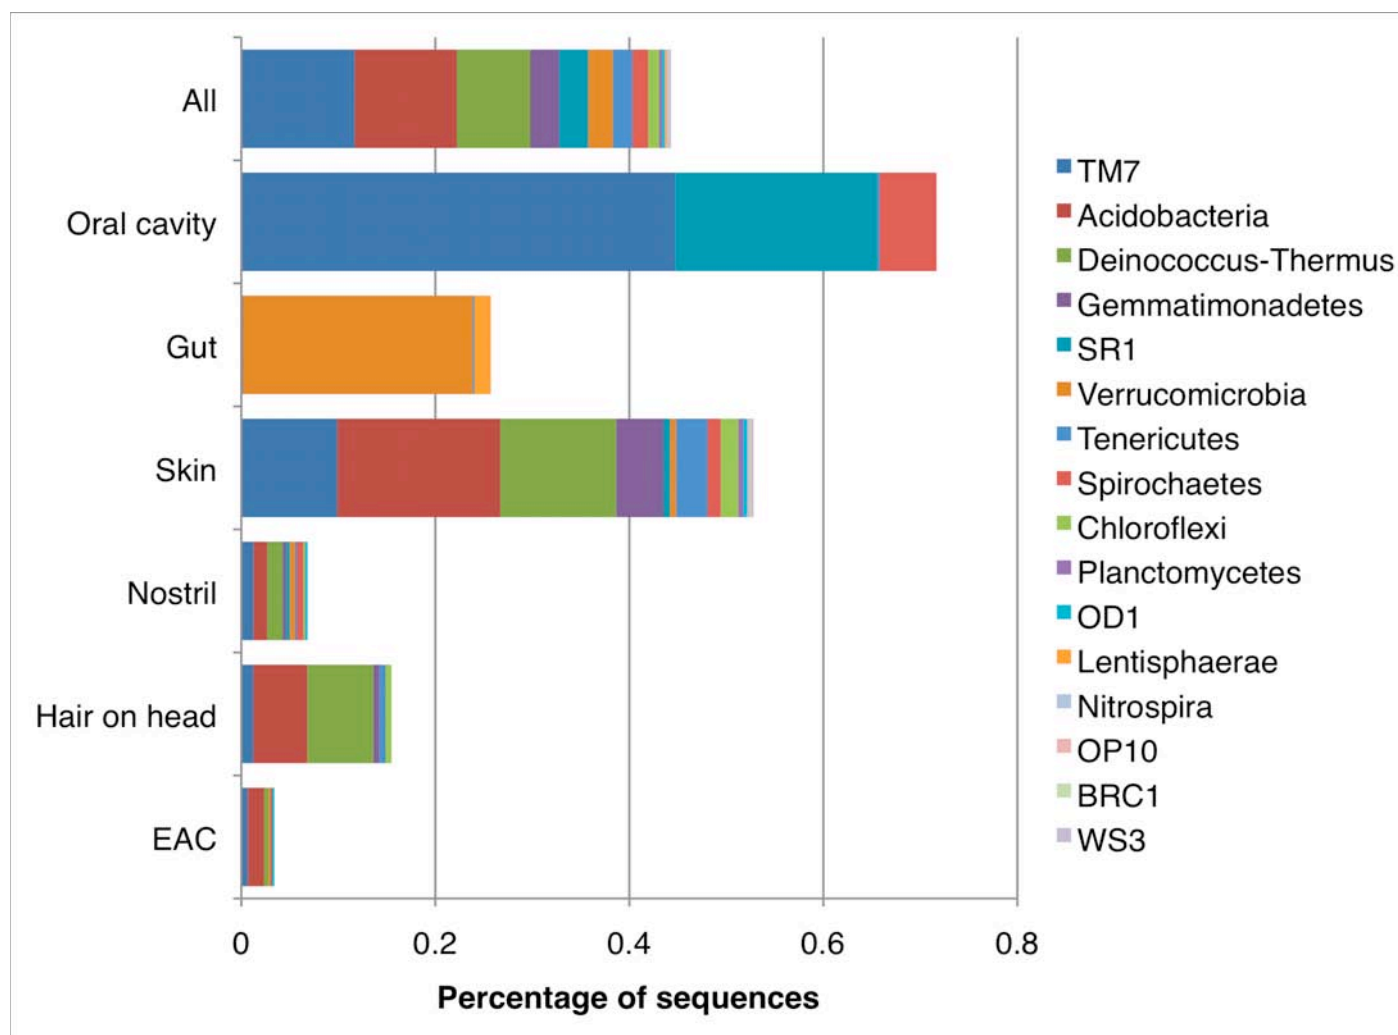

**Fig. S3.** Relative abundances of rare bacterial phyla found in the human body habitats studied. TM7, SR1, OD1, OP10, BRC1, and WS3 are candidate phyla with no cultivated representatives. Some of the phyla shown are not known to occur among the indigenous human microbiota (e.g., Acidobacteria), however we caution that these sequences may be derived from environmental exposures.

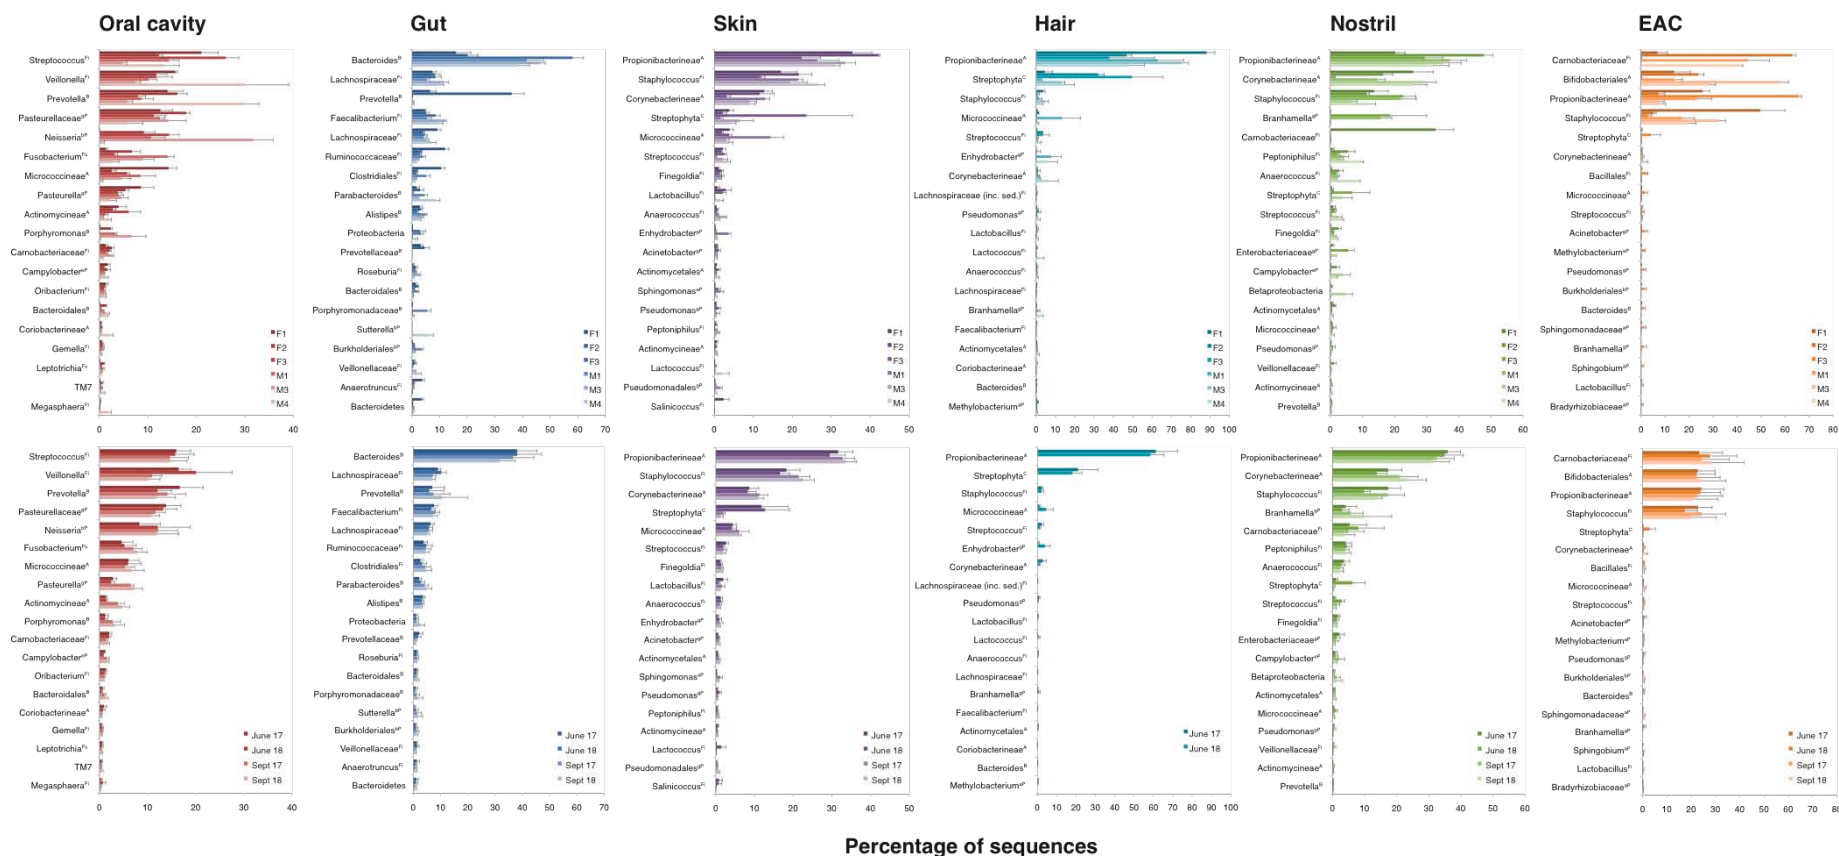

**Fig. S4.** Relative abundances of the 20 most abundant bacterial taxa in the human body habitats studied averaged over days for each person (top panels) and across people on each day (bottom panels). Groups shown represent 85% of skin, 92% of hair, 96% of nostril, 98% of external auditory canal, 92% of gut, and 96% of oral cavity taxa. Error bars are 1 standard error of the mean for 4 days (top panels) or 6 people (bottom panels). Taxon superscripts indicate the phylum or subphylum: A, Actinobacteria; B, Bacteroidetes; C, “Cyanobacteria” (mainly plant chloroplast sequences); Fi, Firmicutes; Fu, Fusobacteria; aP,  $\alpha$  Proteobacteria; bP,  $\beta$  Proteobacteria; gP,  $\gamma$  Proteobacteria; eP,  $\epsilon$  Proteobacteria. TM7 is a candidate phylum with no cultivated representatives. Taxa are classified to the highest taxonomic level to which they could be confidently assigned.

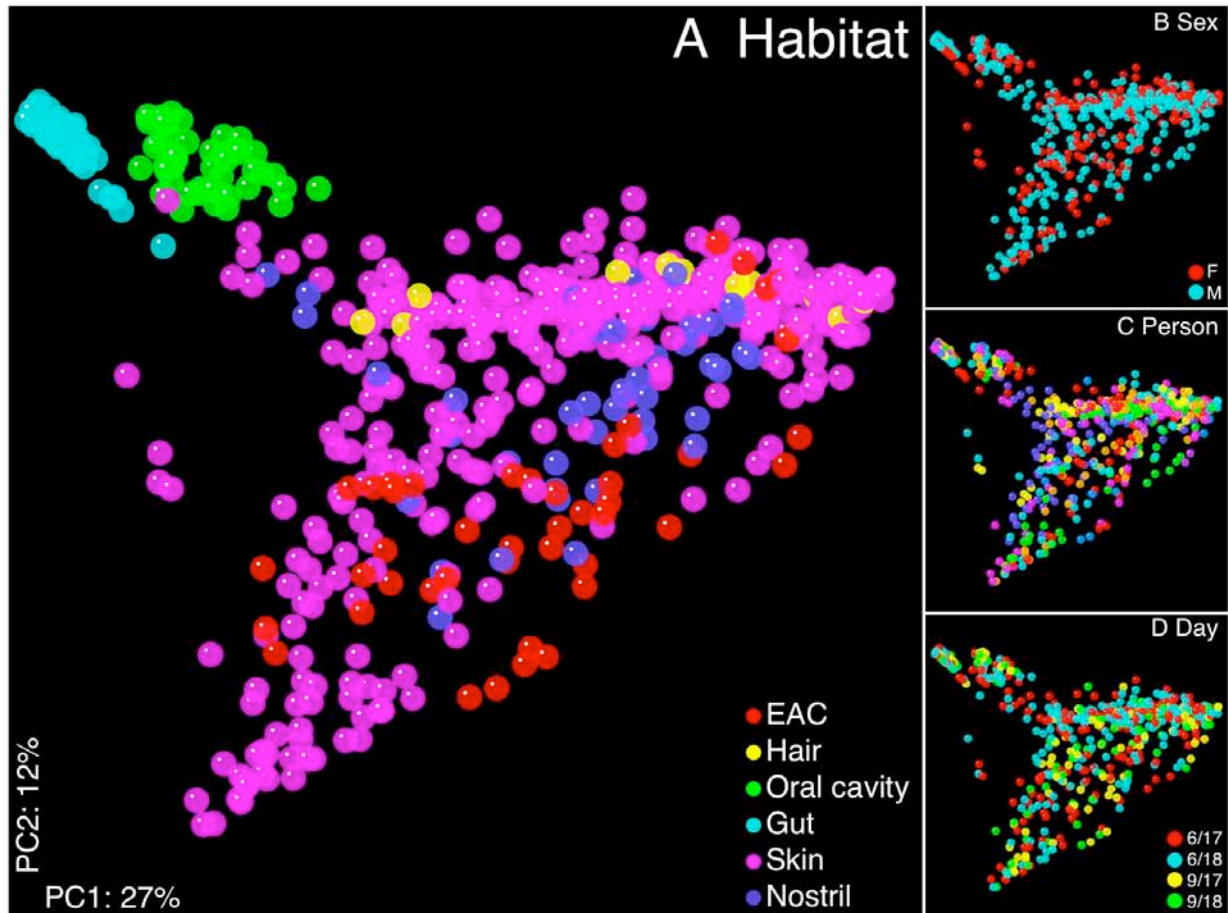

**Fig. S5.** Communities clustered using principal coordinates analysis (PCoA) of the weighted UniFrac distance matrix. PC1 and PC2 are plotted on  $x$  and  $y$  axes. Each point corresponds to a community colored according to (A) body habitat, (B) host sex, (C) host individual, or (D) collection date. The same plot is shown in each panel. The percentage of variation explained by the plotted principal coordinates is indicated on the axes. Gut samples separate from oral cavity samples along PC3 (as in Fig. S22). EAC, external auditory canal; F, female; M, male

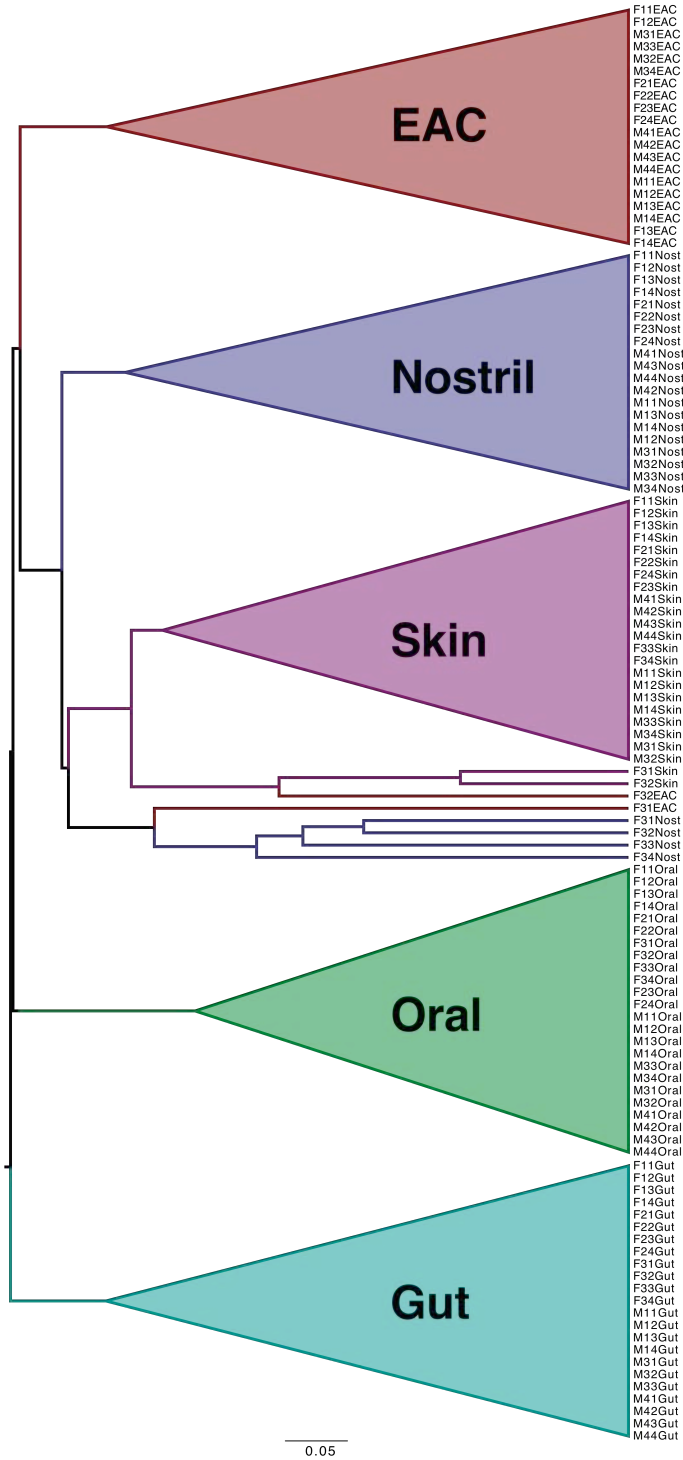

**Fig. S6.** Hierarchical (UPGMA) clustering of composite communities using a phylotype-based measure of compositional dissimilarity (Kulczynski’s quantitative symmetric measure). Communities are from the composite body habitats of each person sampled on each date. Tip labels contain information about the person, date, and habitat sampled. For example, F22Nost is female volunteer #2’s, day 2 (June 18<sup>th</sup>), left and right nostril bacterial community. Habitat clusters are collapsed.

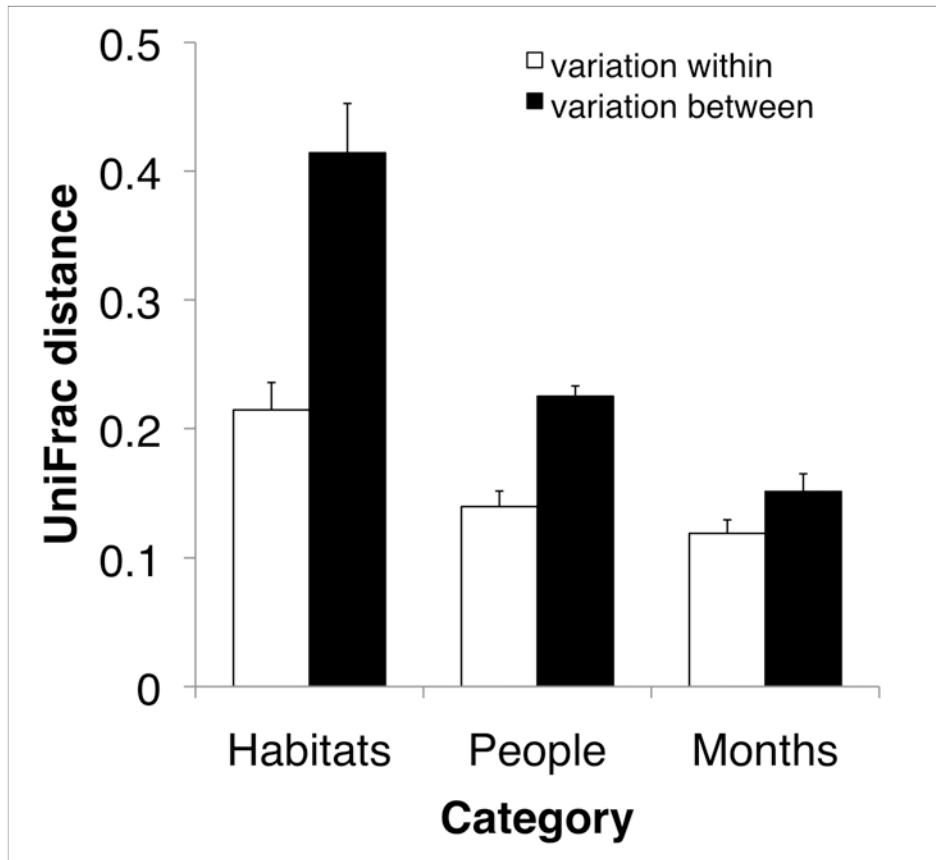

**Fig. S7.** Average weighted UniFrac distance among communities sampled from the same (white bars) or different (black bars) habitats, people, or months. Variation within was significantly less than variation between ( $P < 0.01$  for each comparison, one-tailed  $t$  tests). Error bars are 1 standard error of the mean and habitats are weighted equally.



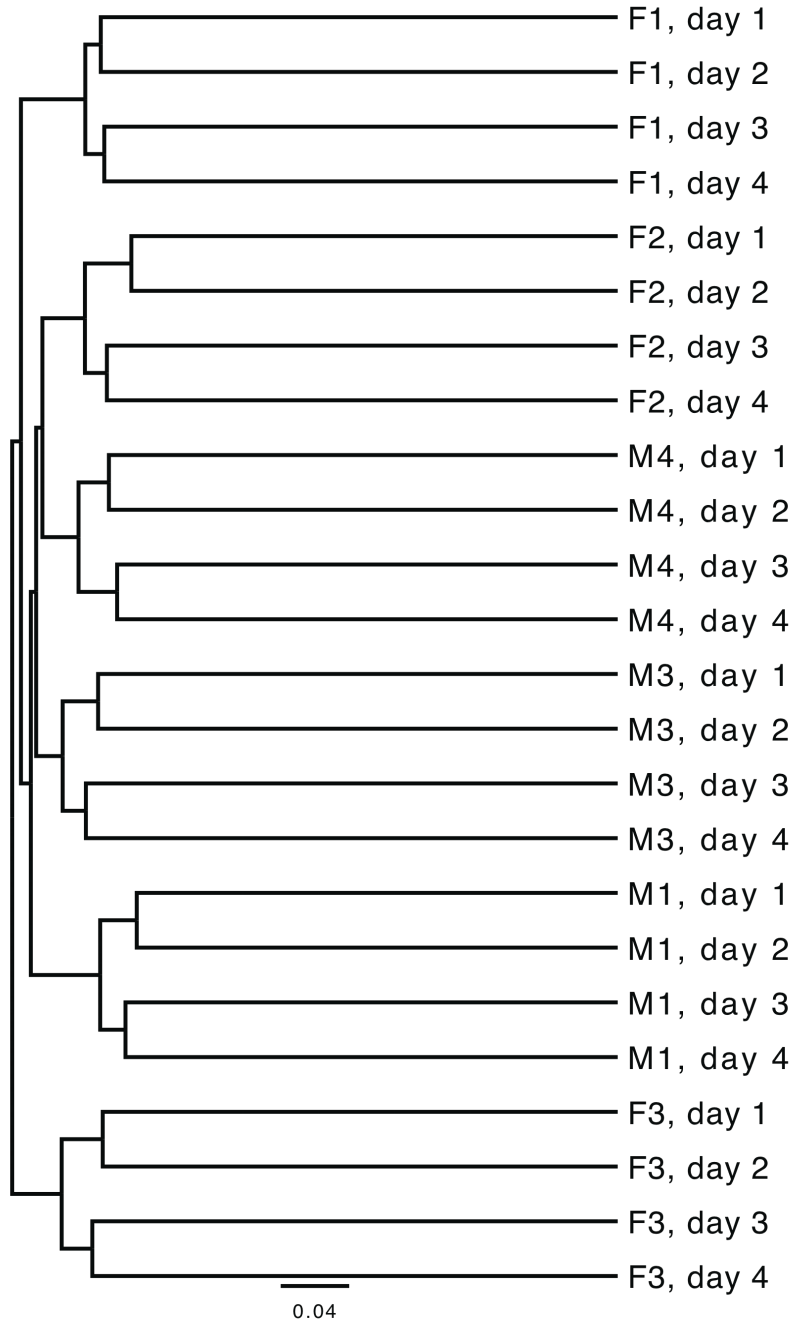

**Fig. S8.** Hierarchical (UPGMA) clustering of communities using a phylogeny-based measure of compositional similarity, the unweighted UniFrac metric. Samples represent composite “whole-body” communities (as defined with respect to our study) for each person on each date. The same number and types of samples were combined for each person/day. Body habitats were not weighted equally (skin was overrepresented). Sequence counts per sample were capped in silico. day 1, June 17<sup>th</sup>; day 2, June 18<sup>th</sup>; day 3, Sept. 17<sup>th</sup>; day 4, Sept. 18<sup>th</sup>, 2008.

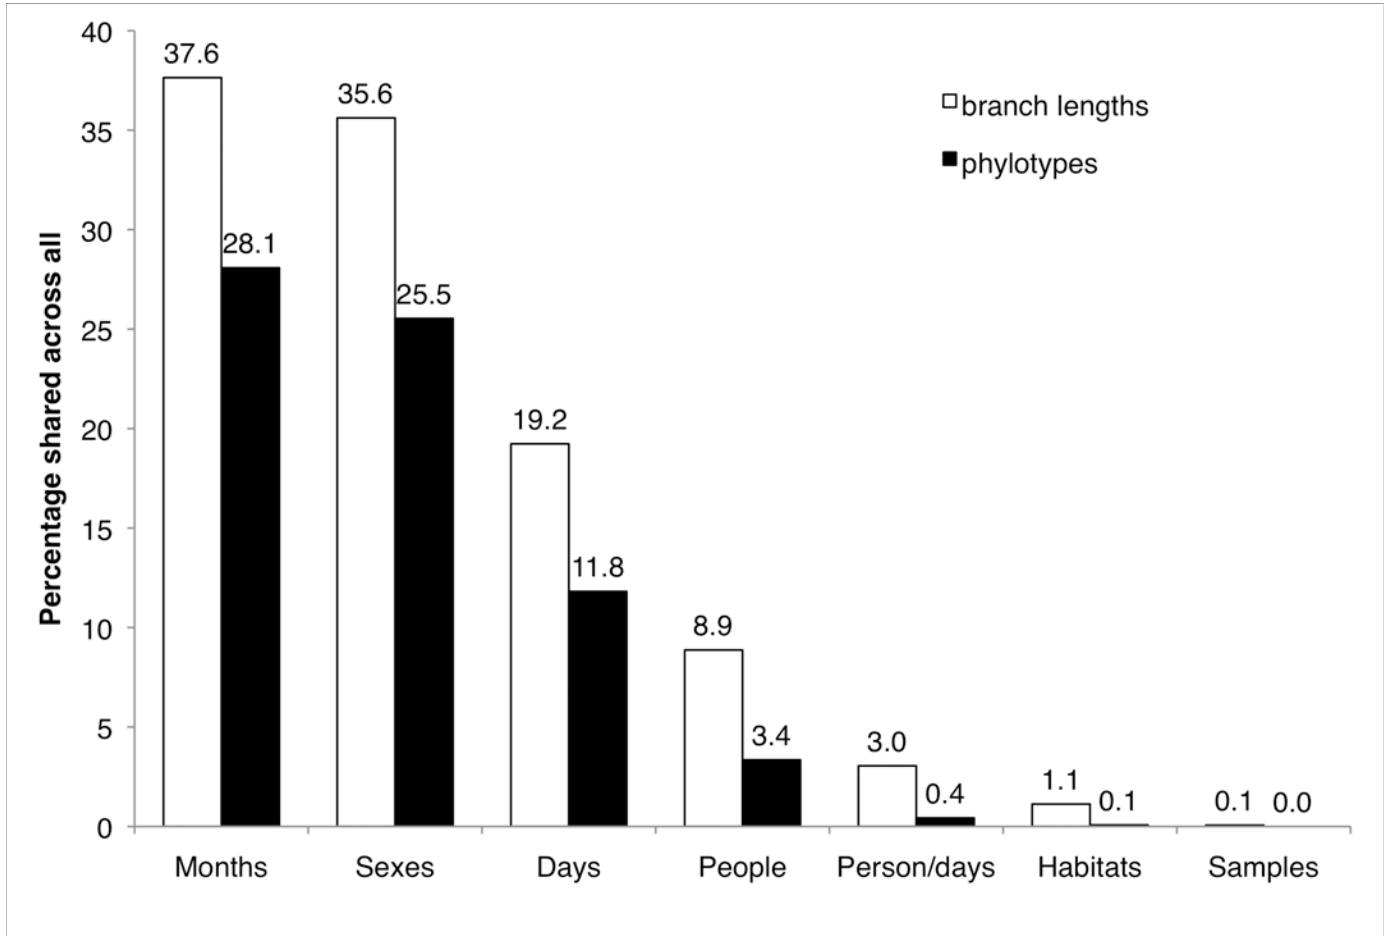

**Fig. S9.** The relative size of the core “organismal lineage” microbiota: the percentage of bacterial diversity measured in our study that appeared in all composite communities within the categories listed along the horizontal axis, given our level of surveying effort. In 16S rRNA “lineage” surveys, the core can be measured in terms of the percentage of shared phylotypes (OTUs defined at  $\geq 97\%$  sequence identity) or evolutionary history (branch lengths in a phylogenetic tree). For example, 28% of phylotypes were observed in both June and September and 38% of the branch segments in the phylogeny had descendents appearing in both months.

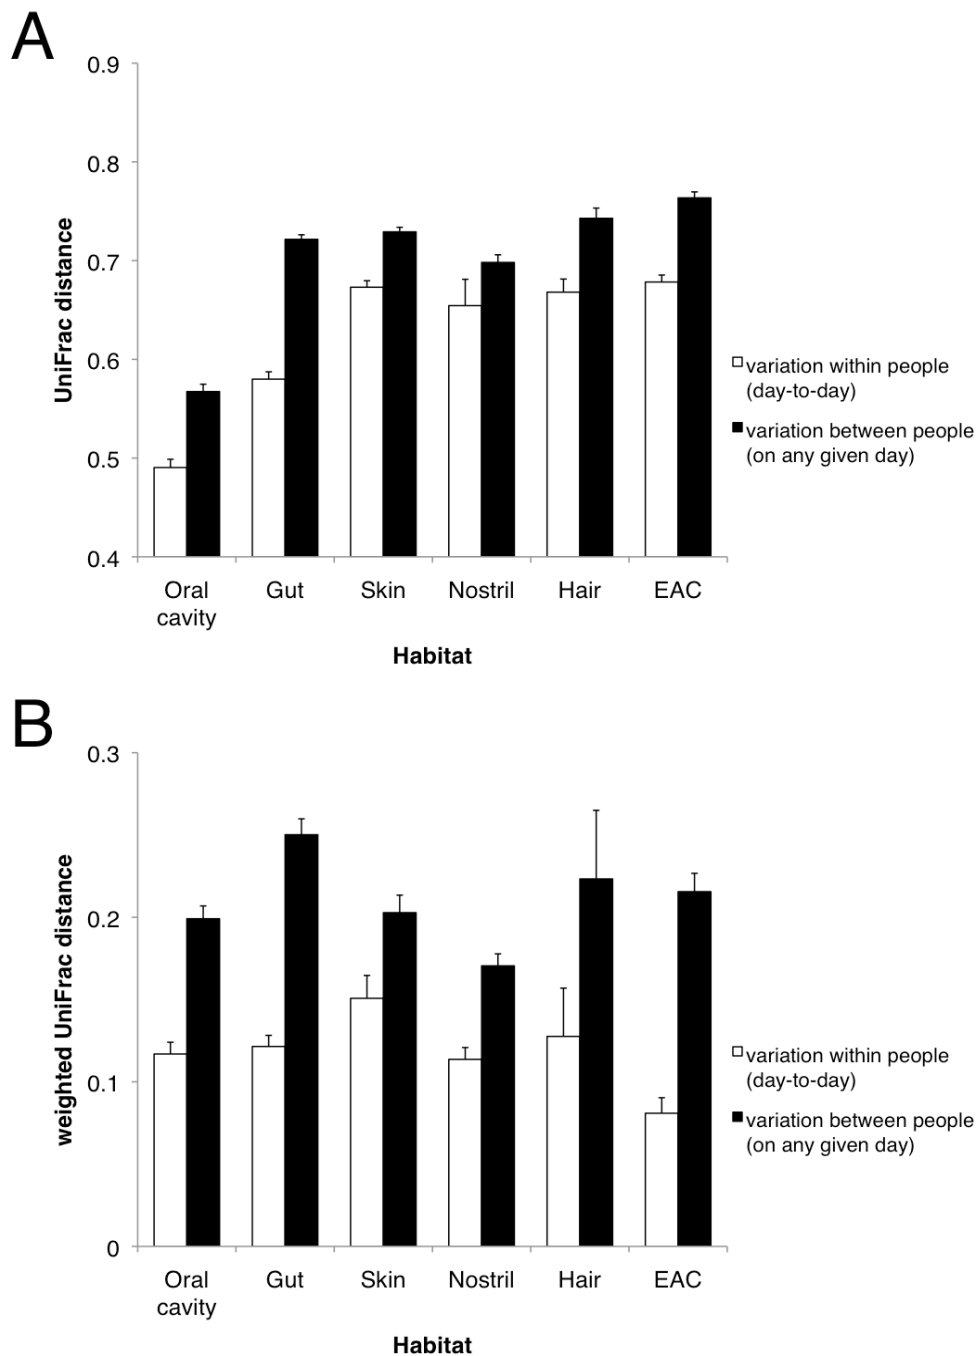

**Fig. S10.** Inter- and intrapersonal variability within body habitats (and for skin, within sites) measured using average (A) unweighted and (B) weighted UniFrac distances. A portion of panel A appears in the main text (Fig. 1F) with values for nostril, hair, and external auditory canal (EAC) omitted due to space constraints. They are shown here for comparison. Error bars are 1 standard error of the mean.

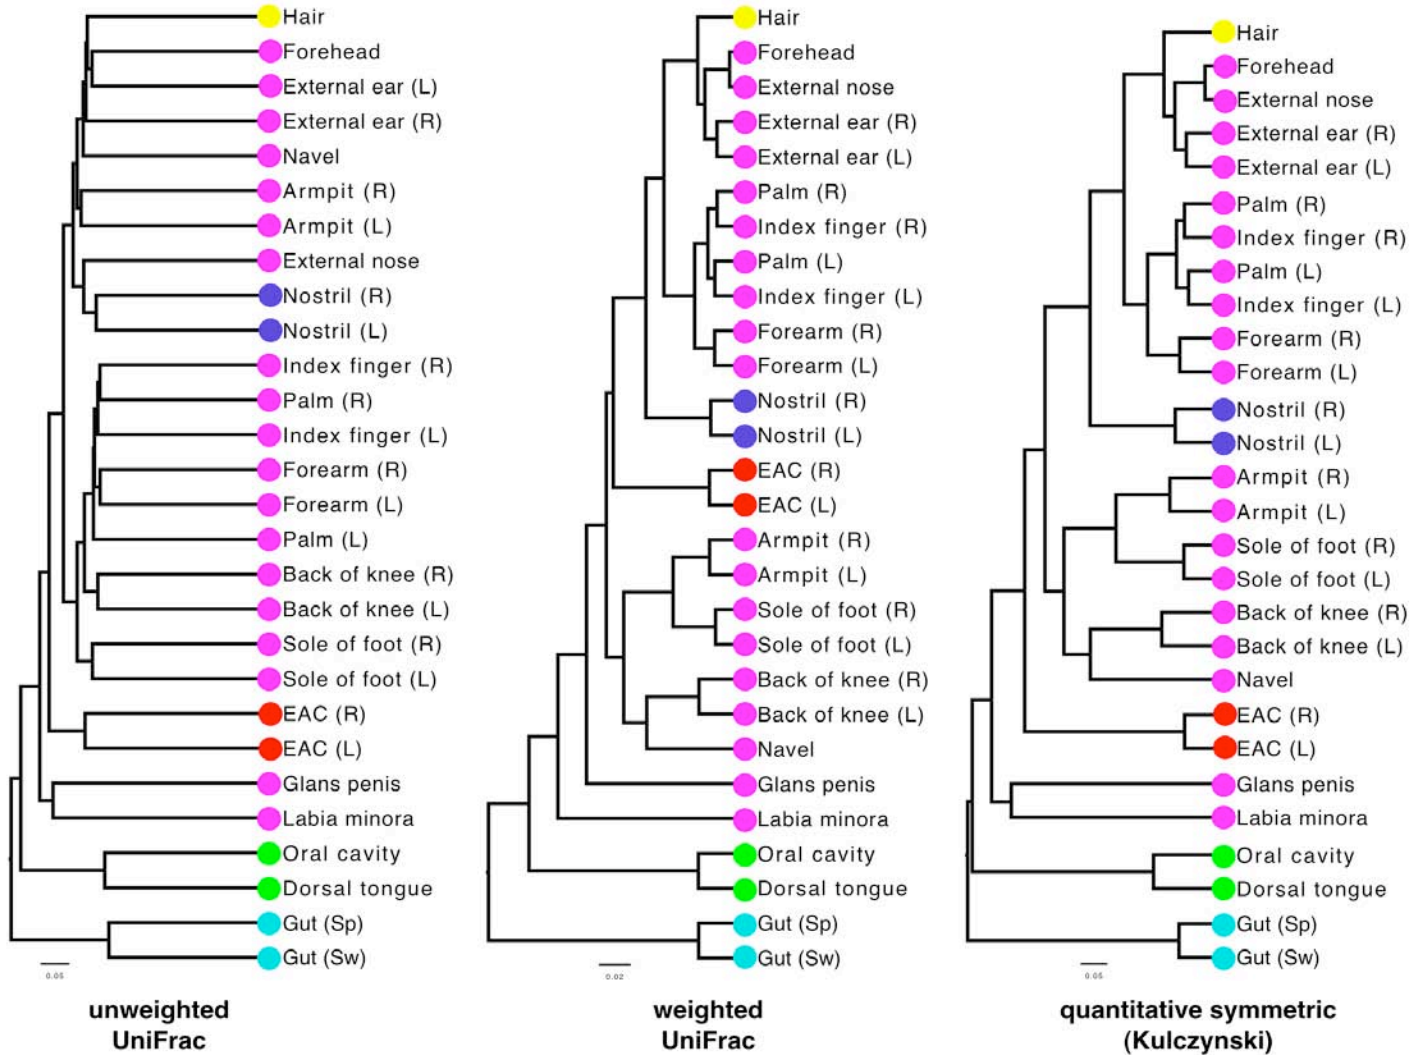

**Fig. S11.** Dendrograms based on UPGMA clustering of unweighted (left) and weighted (middle) UniFrac distance matrices and Kulczynski’s quantitative symmetric dissimilarity matrix (right). Communities are composites of 6 people sampled in June. Leaves are colored according to body habitat as in Fig. 1A and Fig. S5A. R, right; L, left. Stool samples (i.e., gut) were collected using two methods, Sp and Sw (see Methods for details). The middle dendrogram appears in the main text (Fig. 1G) and is shown here for comparison.

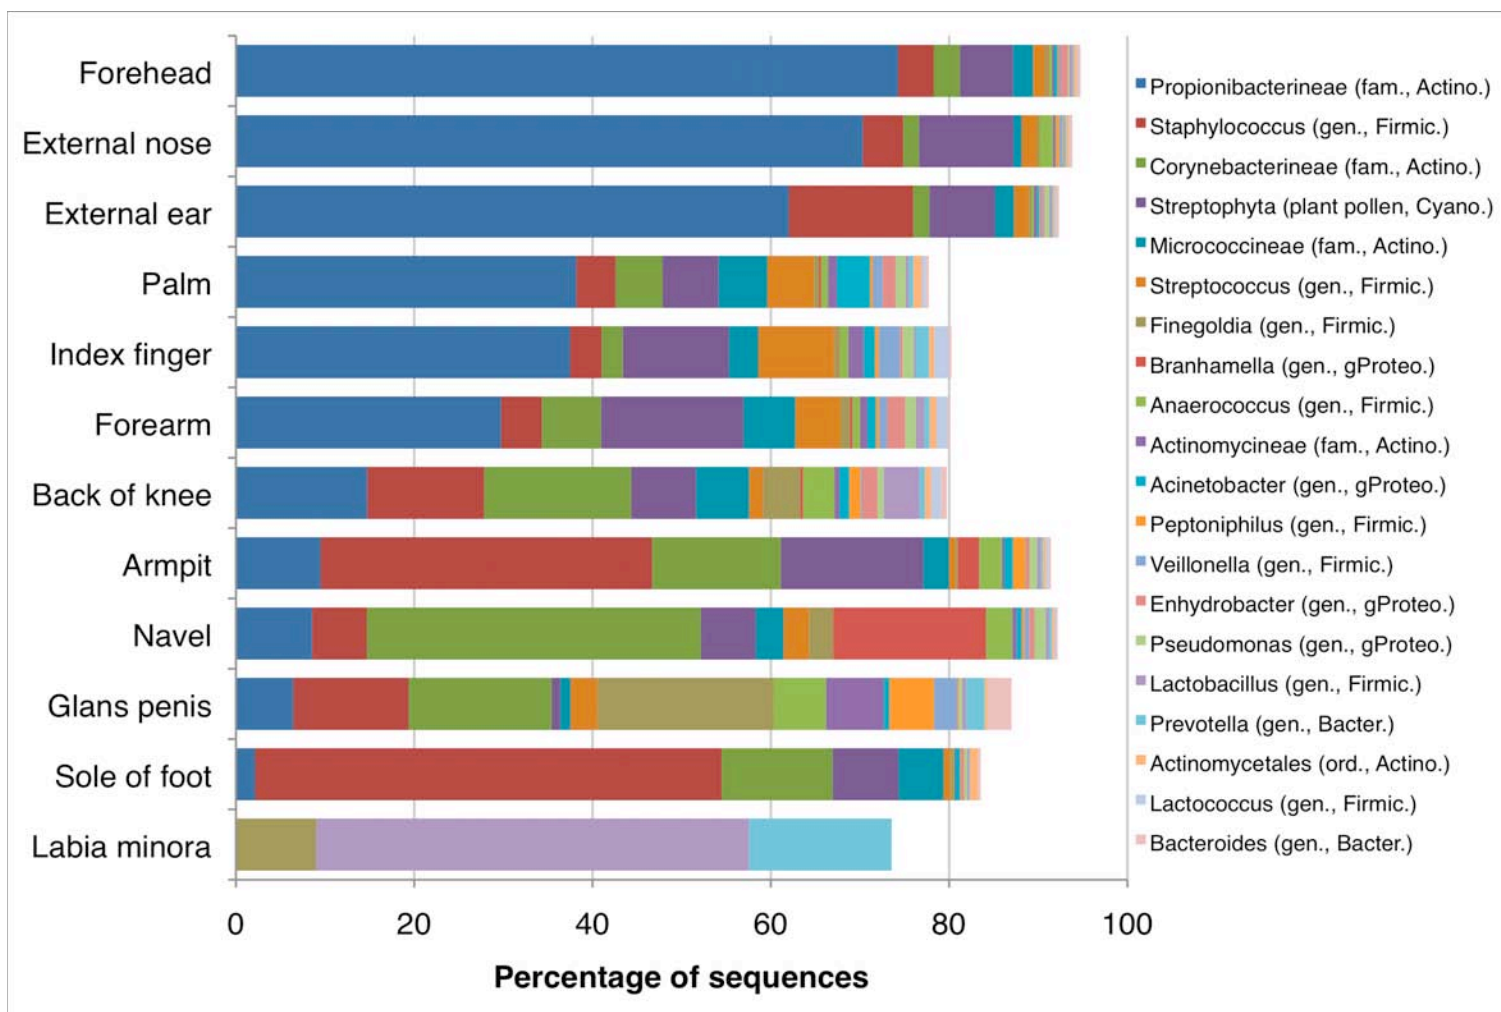

**Fig. S12.** Relative abundances of the 20 most abundant bacterial taxa at various skin surface locations. Classifications are to the genus (gen.), family (fam.), or order (ord.) level. Sites are ranked according to the relative abundance of *Propionibacterineae*. For each taxon, the phylum or subphylum is also indicated: Actino., Actinobacteria; Bacter., Bacteroidetes; Cyano., “Cyanobacteria” (generally plant pollen); Firmic., Firmicutes; gProteo.,  $\gamma$  Proteobacteria. Taxa are classified to the highest taxonomic level to which they were confidently assigned.

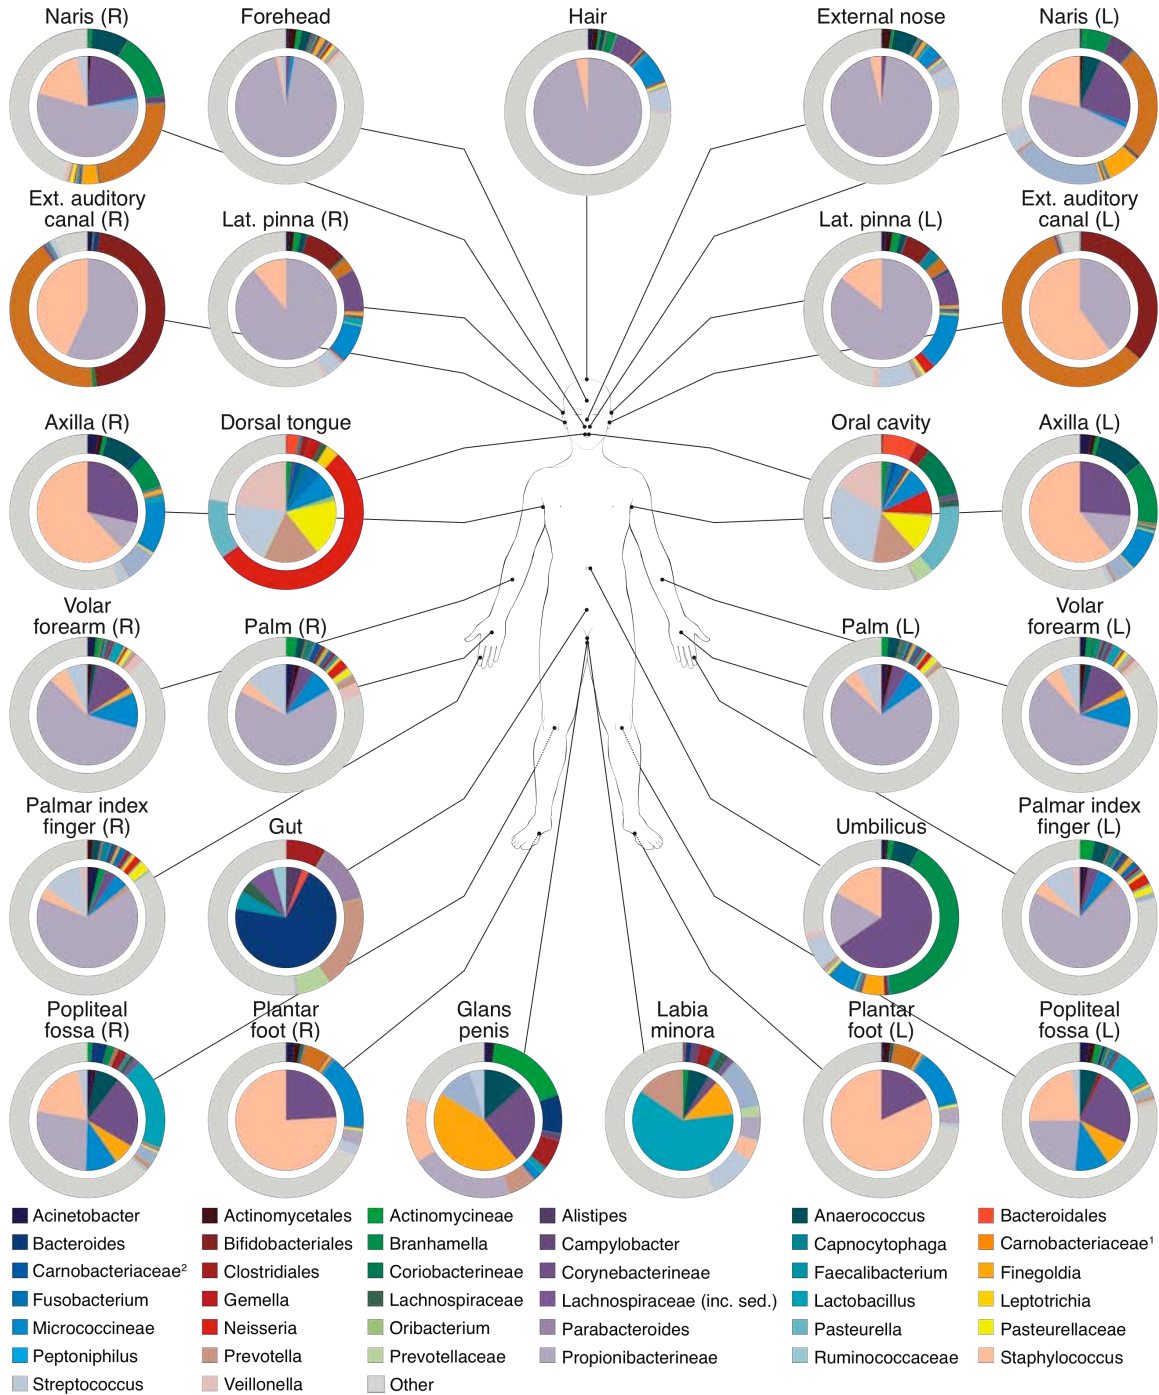

**Fig. S13. Core and peripheral taxa within 27 human body habitats/locations.** Core taxa shown in central pies were detected in all subjects given our level of survey effort. Peripheral taxa, represented in outer rings, were not detected in all subjects. The 40 most abundant lineages are shown, including all core taxa. “Other” taxa, in gray, represent less abundant peripheral lineages. Taxa are classified to the highest taxonomic level to which they were confidently assigned. R, right; L, left.

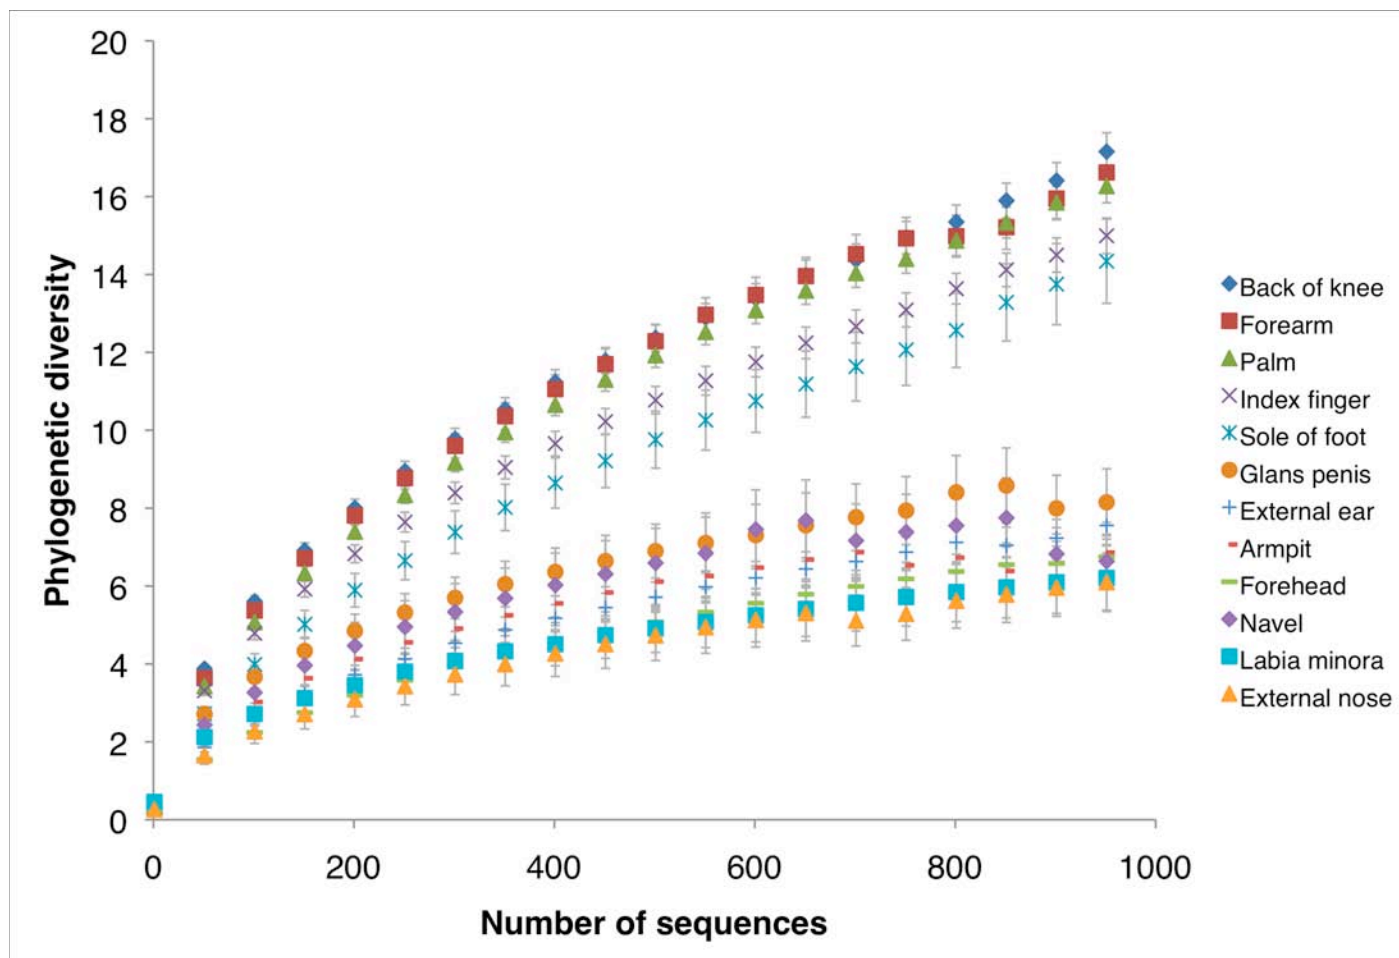

**Fig. S14.** Site-to-site variation in skin surface bacterial diversity. Phylogenetic diversity rarefaction curves for communities sampled from the listed skin locations of 6 people. Sites track into two groups: high and low diversity. Sites within these two groups were averaged for the rarefaction analysis shown in Fig. 3A of the main text. Mean  $\pm$  95% confidence intervals shown. A decrease (or abrupt increase) in diversity with increasing number of sampled sequences occurs when samples drop from the analysis due to lower total sequence count.

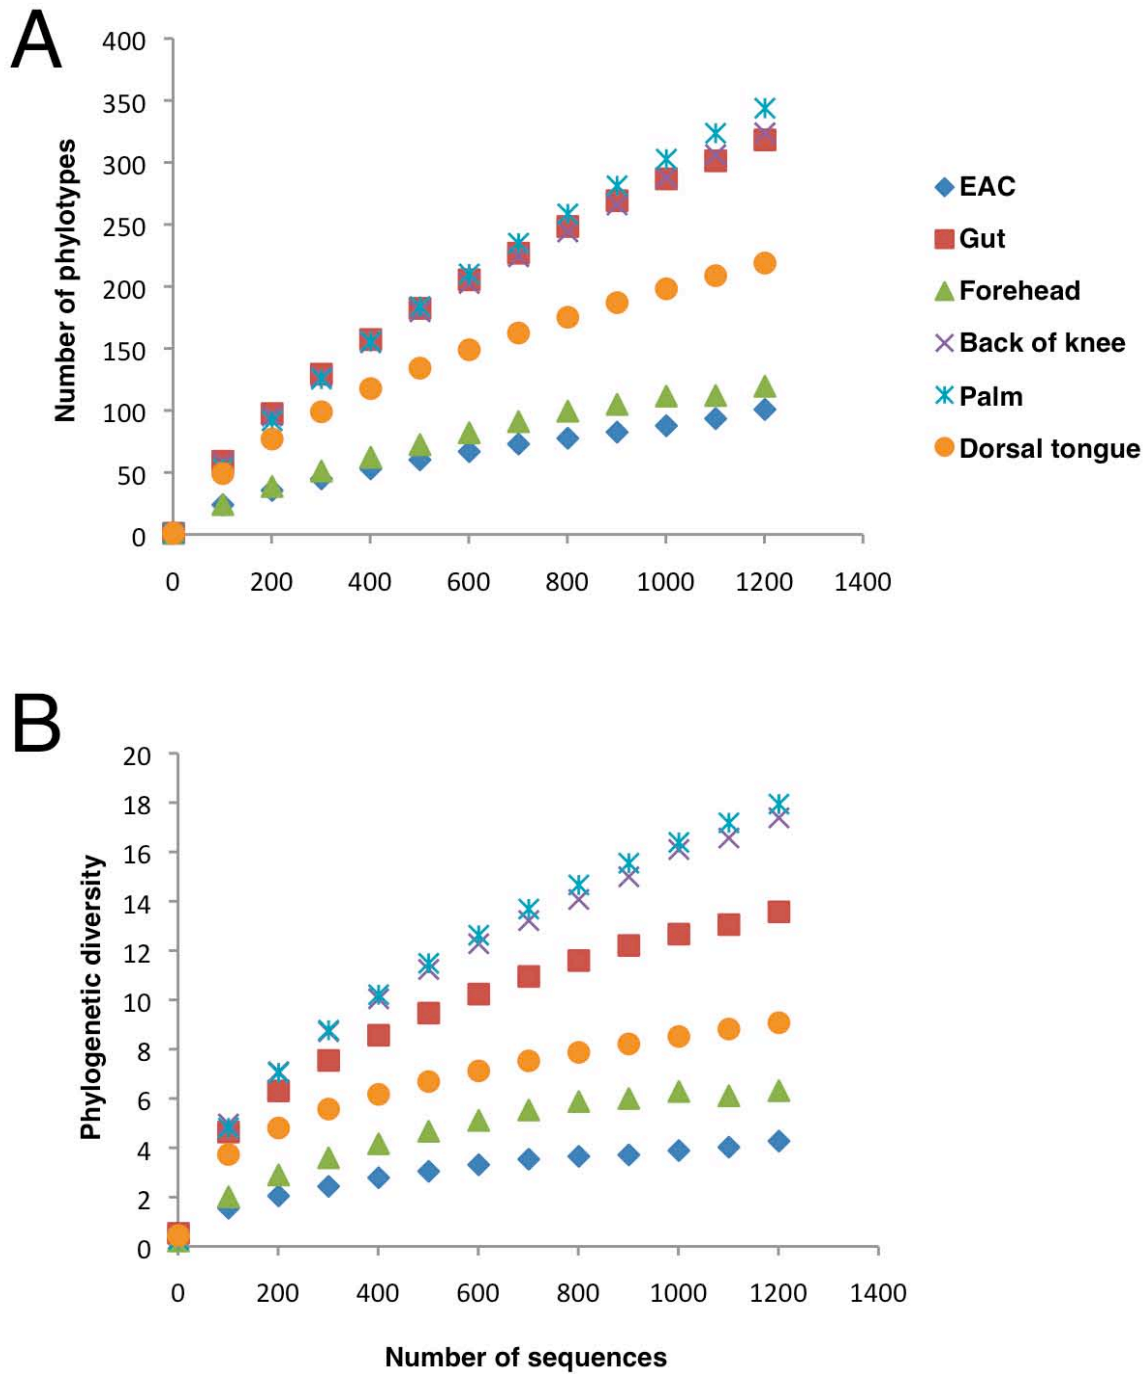

**Fig. S15.** Comparison of selected high and low diversity skin sites to other body habitats, as measured using (A) the number of phylotypes (species-level OTUs defined at  $\geq 97\%$  sequence identity) found within communities and (B) phylogenetic diversity, a branch length-based measure indicative of the amount of evolutionary history represented by a community within a phylogenetic tree.



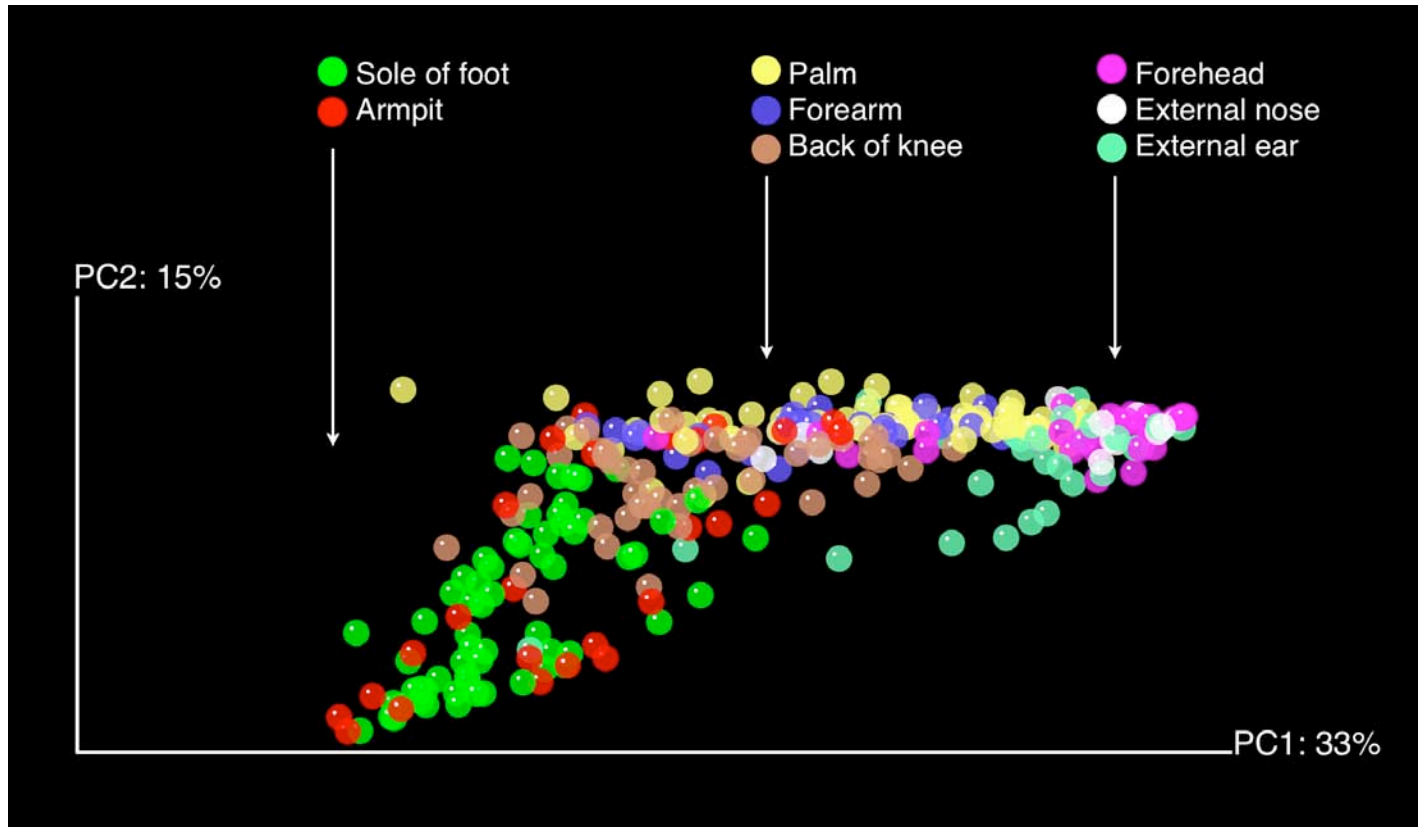

**Fig. S16.** Skin communities (selected locations) clustered using principal coordinates analysis (PCoA) of the weighted UniFrac distance matrix. Scaled PC1 and PC2 are plotted on  $x$  and  $y$  axes. Each point corresponds to a community colored according to skin location. The percentage of variation explained by the plotted principal coordinates is indicated on the axes.

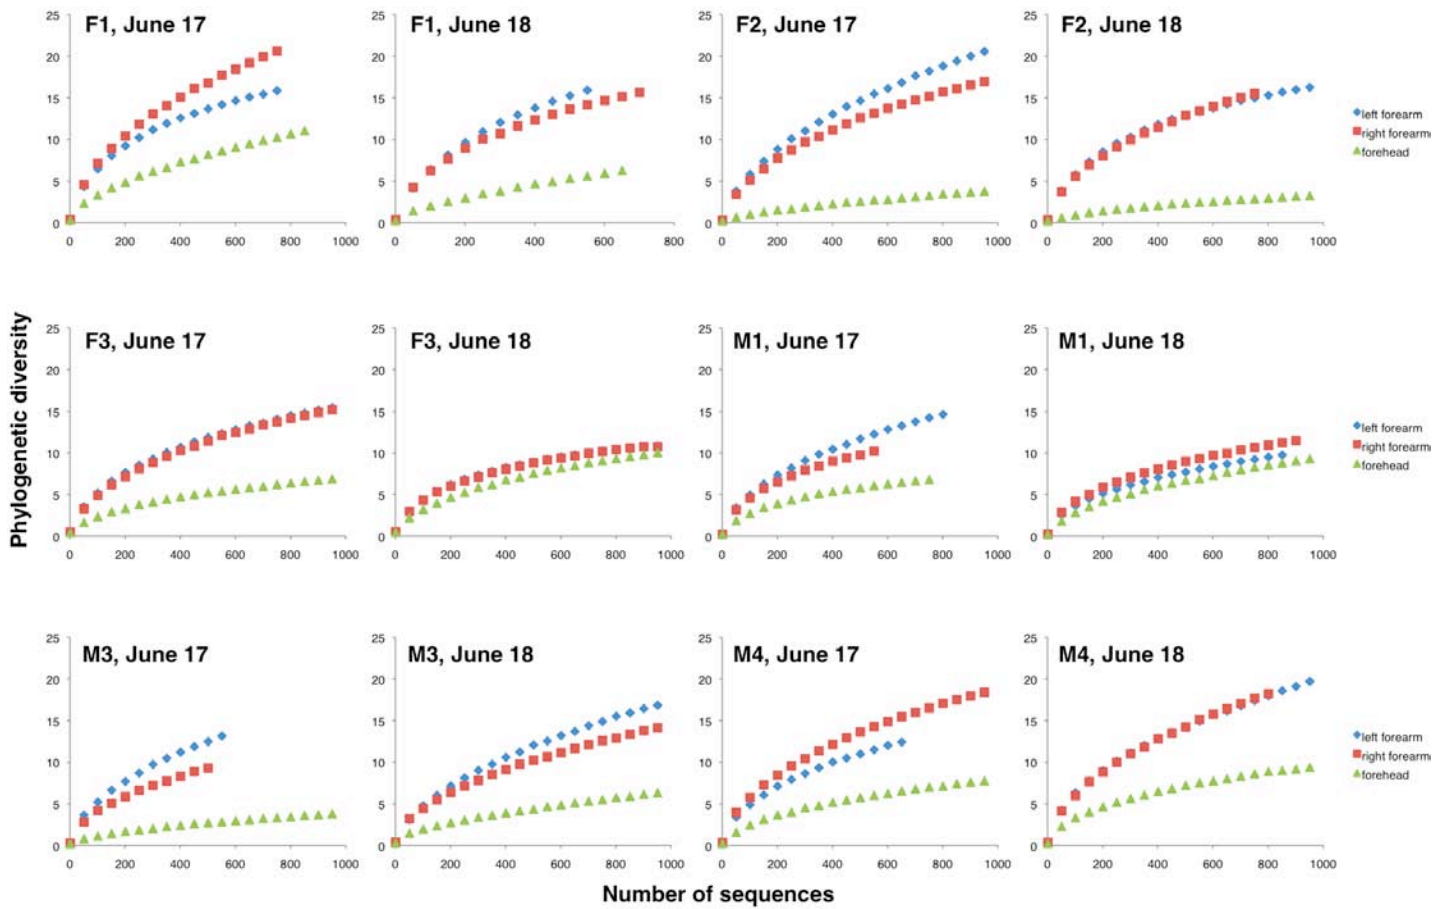

**Fig. S17.** The forehead is generally less diverse than the forearm. Phylogenetic diversity rarefaction curves for communities sampled from the forehead and volar forearms of 6 people in June. Each curve represents a single sample.

| TIME                                                | ACTIVITY                                             | DESCRIPTION                                                                                                                                                                                                                                                                                                                                                                                                                                                                                                                                                                                                                                                                                                                                                                                                                                                                                                                                                                                                    |                                                     |                                                      |                            |                             |                                                     |                                                      |                            |                             |
|-----------------------------------------------------|------------------------------------------------------|----------------------------------------------------------------------------------------------------------------------------------------------------------------------------------------------------------------------------------------------------------------------------------------------------------------------------------------------------------------------------------------------------------------------------------------------------------------------------------------------------------------------------------------------------------------------------------------------------------------------------------------------------------------------------------------------------------------------------------------------------------------------------------------------------------------------------------------------------------------------------------------------------------------------------------------------------------------------------------------------------------------|-----------------------------------------------------|------------------------------------------------------|----------------------------|-----------------------------|-----------------------------------------------------|------------------------------------------------------|----------------------------|-----------------------------|
| 8:00 AM                                             | <b>SWAB TONGUE</b>                                   | Take 5 tongue swabs simultaneously, one for sequencing and four for input to forehead <sub>self,other</sub> and forearm <sub>self,other</sub> .                                                                                                                                                                                                                                                                                                                                                                                                                                                                                                                                                                                                                                                                                                                                                                                                                                                                |                                                     |                                                      |                            |                             |                                                     |                                                      |                            |                             |
| 8:15 AM                                             | <b>PREPARE FOR SAMPLING</b>                          | Wear a surgical mask and gloves, draw grids as shown below using alcohol resistant marker.                                                                                                                                                                                                                                                                                                                                                                                                                                                                                                                                                                                                                                                                                                                                                                                                                                                                                                                     |                                                     |                                                      |                            |                             |                                                     |                                                      |                            |                             |
| 8:30 AM                                             | <b>INITIAL SAMPLE TIME = 0 hours</b>                 | <div style="display: flex; justify-content: space-around; align-items: center;"> <div style="text-align: center;"> <p><b>Left Forearm</b></p> <p>thumb</p> <table border="1" style="border-collapse: collapse;"> <tr> <td style="padding: 2px;">1 = swab<sub>10</sub>, swab<sub>input self</sub></td> <td style="padding: 2px;">2 = swab<sub>10</sub>, swab<sub>input other</sub></td> </tr> <tr> <td style="padding: 2px;">3 = swab<sub>10</sub></td> <td style="padding: 2px;">4 = swab<sub>10</sub></td> </tr> </table> <p>pinkie</p> </div> <div style="text-align: center;"> <p><b>Forehead</b></p> <p>hair</p> <table border="1" style="border-collapse: collapse;"> <tr> <td style="padding: 2px;">5 = swab<sub>10</sub>, swab<sub>input self</sub></td> <td style="padding: 2px;">6 = swab<sub>10</sub>, swab<sub>input other</sub></td> </tr> <tr> <td style="padding: 2px;">7 = swab<sub>10</sub></td> <td style="padding: 2px;">8 = swab<sub>10</sub></td> </tr> </table> <p>nose</p> </div> </div> | 1 = swab <sub>10</sub> , swab <sub>input self</sub> | 2 = swab <sub>10</sub> , swab <sub>input other</sub> | 3 = swab <sub>10</sub>     | 4 = swab <sub>10</sub>      | 5 = swab <sub>10</sub> , swab <sub>input self</sub> | 6 = swab <sub>10</sub> , swab <sub>input other</sub> | 7 = swab <sub>10</sub>     | 8 = swab <sub>10</sub>      |
| 1 = swab <sub>10</sub> , swab <sub>input self</sub> | 2 = swab <sub>10</sub> , swab <sub>input other</sub> |                                                                                                                                                                                                                                                                                                                                                                                                                                                                                                                                                                                                                                                                                                                                                                                                                                                                                                                                                                                                                |                                                     |                                                      |                            |                             |                                                     |                                                      |                            |                             |
| 3 = swab <sub>10</sub>                              | 4 = swab <sub>10</sub>                               |                                                                                                                                                                                                                                                                                                                                                                                                                                                                                                                                                                                                                                                                                                                                                                                                                                                                                                                                                                                                                |                                                     |                                                      |                            |                             |                                                     |                                                      |                            |                             |
| 5 = swab <sub>10</sub> , swab <sub>input self</sub> | 6 = swab <sub>10</sub> , swab <sub>input other</sub> |                                                                                                                                                                                                                                                                                                                                                                                                                                                                                                                                                                                                                                                                                                                                                                                                                                                                                                                                                                                                                |                                                     |                                                      |                            |                             |                                                     |                                                      |                            |                             |
| 7 = swab <sub>10</sub>                              | 8 = swab <sub>10</sub>                               |                                                                                                                                                                                                                                                                                                                                                                                                                                                                                                                                                                                                                                                                                                                                                                                                                                                                                                                                                                                                                |                                                     |                                                      |                            |                             |                                                     |                                                      |                            |                             |
| 8:45 AM                                             | <b>DISINFECT</b>                                     | Wearing gloves, scrub grids with liquid antibiotic soap using sterile sponge and water, rinse, dry, rub with isopropanol, rub with ethanol.                                                                                                                                                                                                                                                                                                                                                                                                                                                                                                                                                                                                                                                                                                                                                                                                                                                                    |                                                     |                                                      |                            |                             |                                                     |                                                      |                            |                             |
| 9:00 AM                                             | <b>TRANSPLANT</b>                                    | <div style="display: flex; justify-content: space-around; align-items: center;"> <div style="text-align: center;"> <p><b>Left Forearm</b></p> <p>thumb</p> <table border="1" style="border-collapse: collapse;"> <tr> <td style="padding: 2px;">1 = forehead<sub>self</sub></td> <td style="padding: 2px;">2 = forehead<sub>other</sub></td> </tr> <tr> <td style="padding: 2px;">3 = tongue<sub>self</sub></td> <td style="padding: 2px;">4 = tongue<sub>other</sub></td> </tr> </table> <p>pinkie</p> </div> <div style="text-align: center;"> <p><b>Forehead</b></p> <p>hair</p> <table border="1" style="border-collapse: collapse;"> <tr> <td style="padding: 2px;">5 = forearm<sub>self</sub></td> <td style="padding: 2px;">6 = forearm<sub>other</sub></td> </tr> <tr> <td style="padding: 2px;">7 = tongue<sub>self</sub></td> <td style="padding: 2px;">8 = tongue<sub>other</sub></td> </tr> </table> <p>nose</p> </div> </div>                                                                     | 1 = forehead <sub>self</sub>                        | 2 = forehead <sub>other</sub>                        | 3 = tongue <sub>self</sub> | 4 = tongue <sub>other</sub> | 5 = forearm <sub>self</sub>                         | 6 = forearm <sub>other</sub>                         | 7 = tongue <sub>self</sub> | 8 = tongue <sub>other</sub> |
| 1 = forehead <sub>self</sub>                        | 2 = forehead <sub>other</sub>                        |                                                                                                                                                                                                                                                                                                                                                                                                                                                                                                                                                                                                                                                                                                                                                                                                                                                                                                                                                                                                                |                                                     |                                                      |                            |                             |                                                     |                                                      |                            |                             |
| 3 = tongue <sub>self</sub>                          | 4 = tongue <sub>other</sub>                          |                                                                                                                                                                                                                                                                                                                                                                                                                                                                                                                                                                                                                                                                                                                                                                                                                                                                                                                                                                                                                |                                                     |                                                      |                            |                             |                                                     |                                                      |                            |                             |
| 5 = forearm <sub>self</sub>                         | 6 = forearm <sub>other</sub>                         |                                                                                                                                                                                                                                                                                                                                                                                                                                                                                                                                                                                                                                                                                                                                                                                                                                                                                                                                                                                                                |                                                     |                                                      |                            |                             |                                                     |                                                      |                            |                             |
| 7 = tongue <sub>self</sub>                          | 8 = tongue <sub>other</sub>                          |                                                                                                                                                                                                                                                                                                                                                                                                                                                                                                                                                                                                                                                                                                                                                                                                                                                                                                                                                                                                                |                                                     |                                                      |                            |                             |                                                     |                                                      |                            |                             |
| 9:15 AM                                             | <b>COVER</b>                                         | Tape a sterile gauze loosely over the grids to prevent major disturbance.                                                                                                                                                                                                                                                                                                                                                                                                                                                                                                                                                                                                                                                                                                                                                                                                                                                                                                                                      |                                                     |                                                      |                            |                             |                                                     |                                                      |                            |                             |
| 11:00 AM                                            | <b>SAMPLE TIME = 2 hours</b>                         | <div style="display: flex; justify-content: space-around; align-items: center;"> <div style="text-align: center;"> <p><b>Left Forearm</b></p> <p>thumb</p> <table border="1" style="border-collapse: collapse;"> <tr> <td style="padding: 2px;">1 = swab<sub>12</sub></td> <td style="padding: 2px;">2 = swab<sub>12</sub></td> </tr> <tr> <td style="padding: 2px;">3 = swab<sub>12</sub></td> <td style="padding: 2px;">4 = swab<sub>12</sub></td> </tr> </table> <p>pinkie</p> </div> <div style="text-align: center;"> <p><b>Forehead</b></p> <p>hair</p> <table border="1" style="border-collapse: collapse;"> <tr> <td style="padding: 2px;">5 = swab<sub>12</sub></td> <td style="padding: 2px;">6 = swab<sub>12</sub></td> </tr> <tr> <td style="padding: 2px;">7 = swab<sub>12</sub></td> <td style="padding: 2px;">8 = swab<sub>12</sub></td> </tr> </table> <p>nose</p> </div> </div>                                                                                                               | 1 = swab <sub>12</sub>                              | 2 = swab <sub>12</sub>                               | 3 = swab <sub>12</sub>     | 4 = swab <sub>12</sub>      | 5 = swab <sub>12</sub>                              | 6 = swab <sub>12</sub>                               | 7 = swab <sub>12</sub>     | 8 = swab <sub>12</sub>      |
| 1 = swab <sub>12</sub>                              | 2 = swab <sub>12</sub>                               |                                                                                                                                                                                                                                                                                                                                                                                                                                                                                                                                                                                                                                                                                                                                                                                                                                                                                                                                                                                                                |                                                     |                                                      |                            |                             |                                                     |                                                      |                            |                             |
| 3 = swab <sub>12</sub>                              | 4 = swab <sub>12</sub>                               |                                                                                                                                                                                                                                                                                                                                                                                                                                                                                                                                                                                                                                                                                                                                                                                                                                                                                                                                                                                                                |                                                     |                                                      |                            |                             |                                                     |                                                      |                            |                             |
| 5 = swab <sub>12</sub>                              | 6 = swab <sub>12</sub>                               |                                                                                                                                                                                                                                                                                                                                                                                                                                                                                                                                                                                                                                                                                                                                                                                                                                                                                                                                                                                                                |                                                     |                                                      |                            |                             |                                                     |                                                      |                            |                             |
| 7 = swab <sub>12</sub>                              | 8 = swab <sub>12</sub>                               |                                                                                                                                                                                                                                                                                                                                                                                                                                                                                                                                                                                                                                                                                                                                                                                                                                                                                                                                                                                                                |                                                     |                                                      |                            |                             |                                                     |                                                      |                            |                             |
| 1:00 PM                                             | <b>SAMPLE TIME = 4 hours</b>                         | <div style="display: flex; justify-content: space-around; align-items: center;"> <div style="text-align: center;"> <p><b>Left Forearm</b></p> <p>thumb</p> <table border="1" style="border-collapse: collapse;"> <tr> <td style="padding: 2px;">1 = swab<sub>14</sub></td> <td style="padding: 2px;">2 = swab<sub>14</sub></td> </tr> <tr> <td style="padding: 2px;">3 = swab<sub>14</sub></td> <td style="padding: 2px;">4 = swab<sub>14</sub></td> </tr> </table> <p>pinkie</p> </div> <div style="text-align: center;"> <p><b>Forehead</b></p> <p>hair</p> <table border="1" style="border-collapse: collapse;"> <tr> <td style="padding: 2px;">5 = swab<sub>14</sub></td> <td style="padding: 2px;">6 = swab<sub>14</sub></td> </tr> <tr> <td style="padding: 2px;">7 = swab<sub>14</sub></td> <td style="padding: 2px;">8 = swab<sub>14</sub></td> </tr> </table> <p>nose</p> </div> </div>                                                                                                               | 1 = swab <sub>14</sub>                              | 2 = swab <sub>14</sub>                               | 3 = swab <sub>14</sub>     | 4 = swab <sub>14</sub>      | 5 = swab <sub>14</sub>                              | 6 = swab <sub>14</sub>                               | 7 = swab <sub>14</sub>     | 8 = swab <sub>14</sub>      |
| 1 = swab <sub>14</sub>                              | 2 = swab <sub>14</sub>                               |                                                                                                                                                                                                                                                                                                                                                                                                                                                                                                                                                                                                                                                                                                                                                                                                                                                                                                                                                                                                                |                                                     |                                                      |                            |                             |                                                     |                                                      |                            |                             |
| 3 = swab <sub>14</sub>                              | 4 = swab <sub>14</sub>                               |                                                                                                                                                                                                                                                                                                                                                                                                                                                                                                                                                                                                                                                                                                                                                                                                                                                                                                                                                                                                                |                                                     |                                                      |                            |                             |                                                     |                                                      |                            |                             |
| 5 = swab <sub>14</sub>                              | 6 = swab <sub>14</sub>                               |                                                                                                                                                                                                                                                                                                                                                                                                                                                                                                                                                                                                                                                                                                                                                                                                                                                                                                                                                                                                                |                                                     |                                                      |                            |                             |                                                     |                                                      |                            |                             |
| 7 = swab <sub>14</sub>                              | 8 = swab <sub>14</sub>                               |                                                                                                                                                                                                                                                                                                                                                                                                                                                                                                                                                                                                                                                                                                                                                                                                                                                                                                                                                                                                                |                                                     |                                                      |                            |                             |                                                     |                                                      |                            |                             |
| 5:00 PM                                             | <b>SAMPLE TIME = 8 hours</b>                         | <div style="display: flex; justify-content: space-around; align-items: center;"> <div style="text-align: center;"> <p><b>Left Forearm</b></p> <p>thumb</p> <table border="1" style="border-collapse: collapse;"> <tr> <td style="padding: 2px;">1 = swab<sub>18</sub></td> <td style="padding: 2px;">2 = swab<sub>18</sub></td> </tr> <tr> <td style="padding: 2px;">3 = swab<sub>18</sub></td> <td style="padding: 2px;">4 = swab<sub>18</sub></td> </tr> </table> <p>pinkie</p> </div> <div style="text-align: center;"> <p><b>Forehead</b></p> <p>hair</p> <table border="1" style="border-collapse: collapse;"> <tr> <td style="padding: 2px;">5 = swab<sub>18</sub></td> <td style="padding: 2px;">6 = swab<sub>18</sub></td> </tr> <tr> <td style="padding: 2px;">7 = swab<sub>18</sub></td> <td style="padding: 2px;">8 = swab<sub>18</sub></td> </tr> </table> <p>nose</p> </div> </div>                                                                                                               | 1 = swab <sub>18</sub>                              | 2 = swab <sub>18</sub>                               | 3 = swab <sub>18</sub>     | 4 = swab <sub>18</sub>      | 5 = swab <sub>18</sub>                              | 6 = swab <sub>18</sub>                               | 7 = swab <sub>18</sub>     | 8 = swab <sub>18</sub>      |
| 1 = swab <sub>18</sub>                              | 2 = swab <sub>18</sub>                               |                                                                                                                                                                                                                                                                                                                                                                                                                                                                                                                                                                                                                                                                                                                                                                                                                                                                                                                                                                                                                |                                                     |                                                      |                            |                             |                                                     |                                                      |                            |                             |
| 3 = swab <sub>18</sub>                              | 4 = swab <sub>18</sub>                               |                                                                                                                                                                                                                                                                                                                                                                                                                                                                                                                                                                                                                                                                                                                                                                                                                                                                                                                                                                                                                |                                                     |                                                      |                            |                             |                                                     |                                                      |                            |                             |
| 5 = swab <sub>18</sub>                              | 6 = swab <sub>18</sub>                               |                                                                                                                                                                                                                                                                                                                                                                                                                                                                                                                                                                                                                                                                                                                                                                                                                                                                                                                                                                                                                |                                                     |                                                      |                            |                             |                                                     |                                                      |                            |                             |
| 7 = swab <sub>18</sub>                              | 8 = swab <sub>18</sub>                               |                                                                                                                                                                                                                                                                                                                                                                                                                                                                                                                                                                                                                                                                                                                                                                                                                                                                                                                                                                                                                |                                                     |                                                      |                            |                             |                                                     |                                                      |                            |                             |

**Fig. S18.** Experimental design and timeline of activities for the skin site bacterial community assembly study. The procedure was performed on two consecutive days.

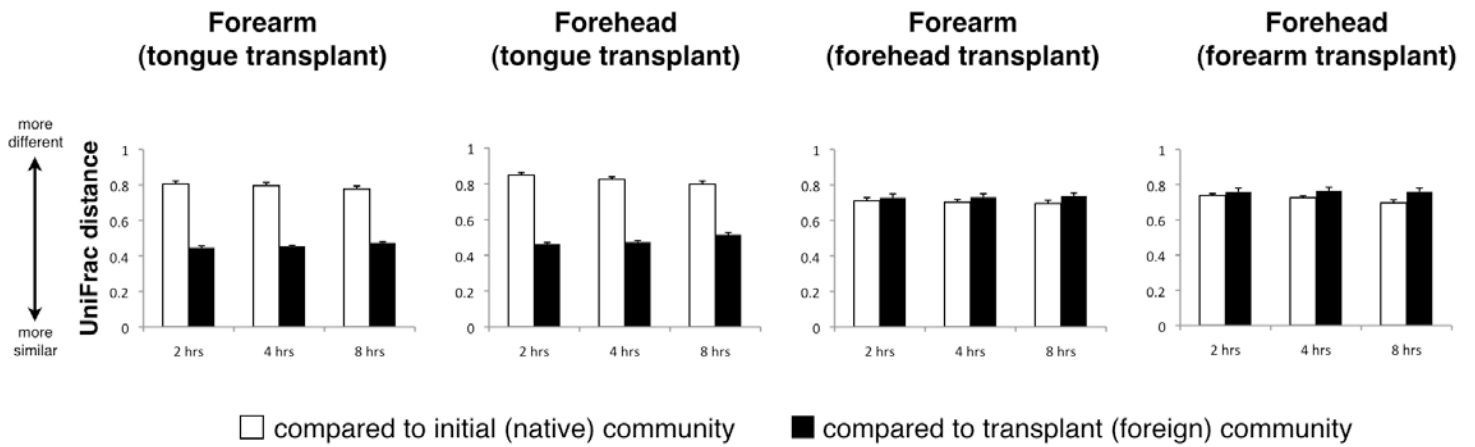

**Fig. S19.** Unweighted UniFrac results for transplantation experiment. Foreign microbiotas were transplanted (“input”) onto disinfected plots on the forearm and forehead, followed by sampling at 2, 4, and 8 hours. Native microbiotas (“initial”) were collected prior to disinfection. The graph shows average unweighted UniFrac distances of samples compared to native (white bars) and transplanted (black bars) communities. Error bars are 1 standard error of the mean.

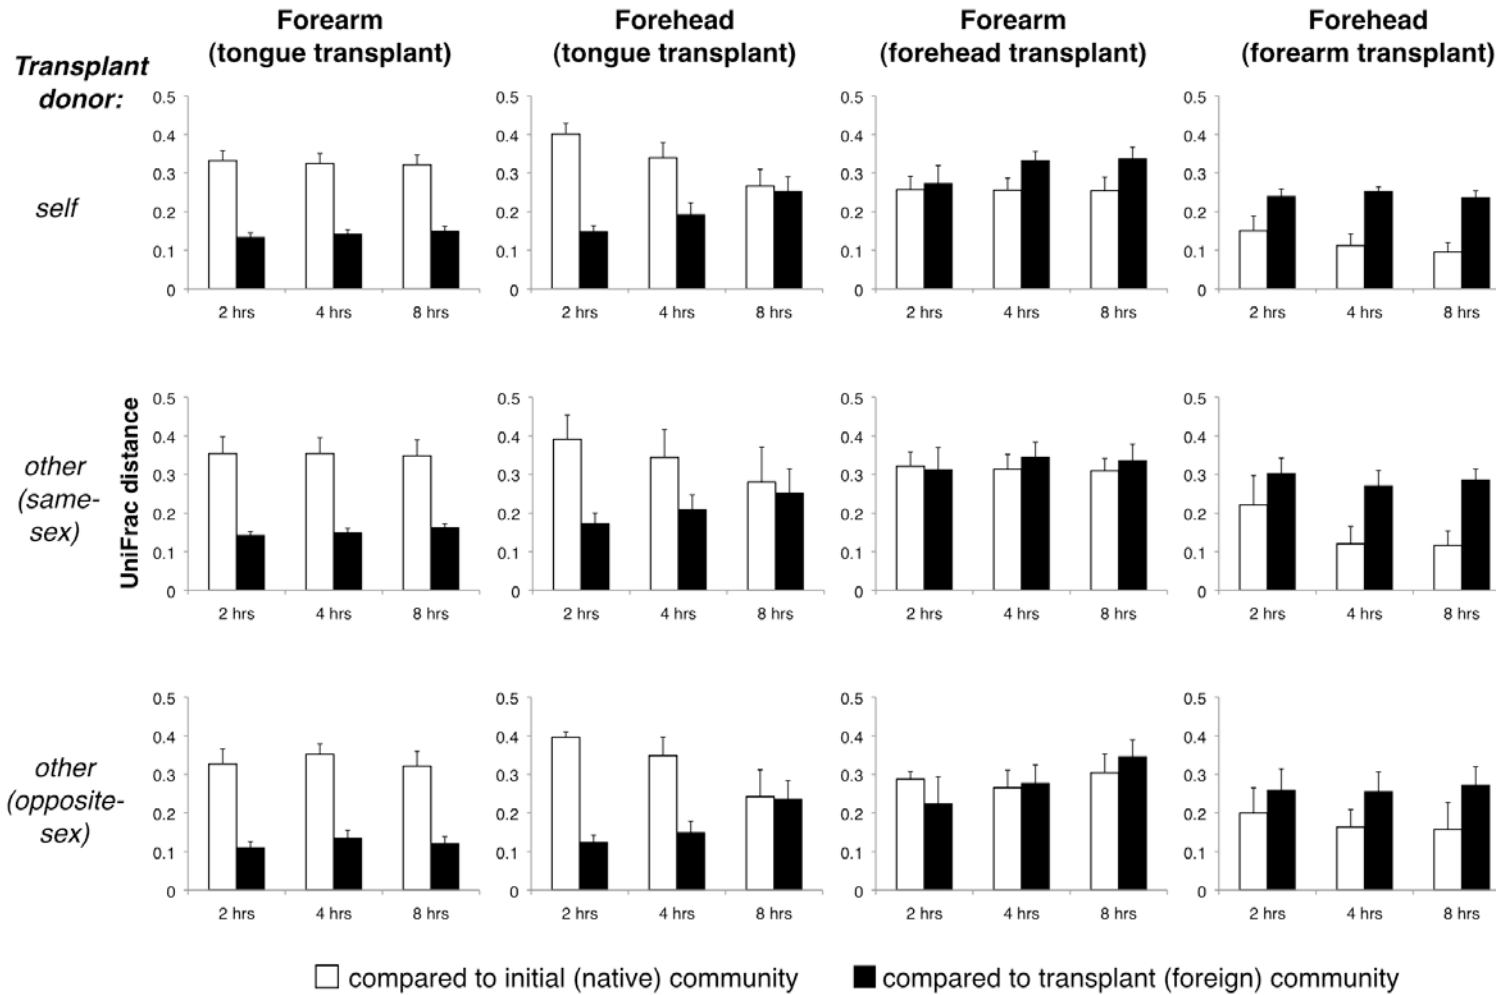

**Fig. S20.** Transplant donor effects on the structural similarity (weighted UniFrac distance) of assembling skin communities compared to native (white bars) and transplanted (black bars) microbiotas. Upper panels, intrapersonal transplant; middle panels, interpersonal transplant from same-sex individual; bottom panels, interpersonal transplant from opposite-sex individual.

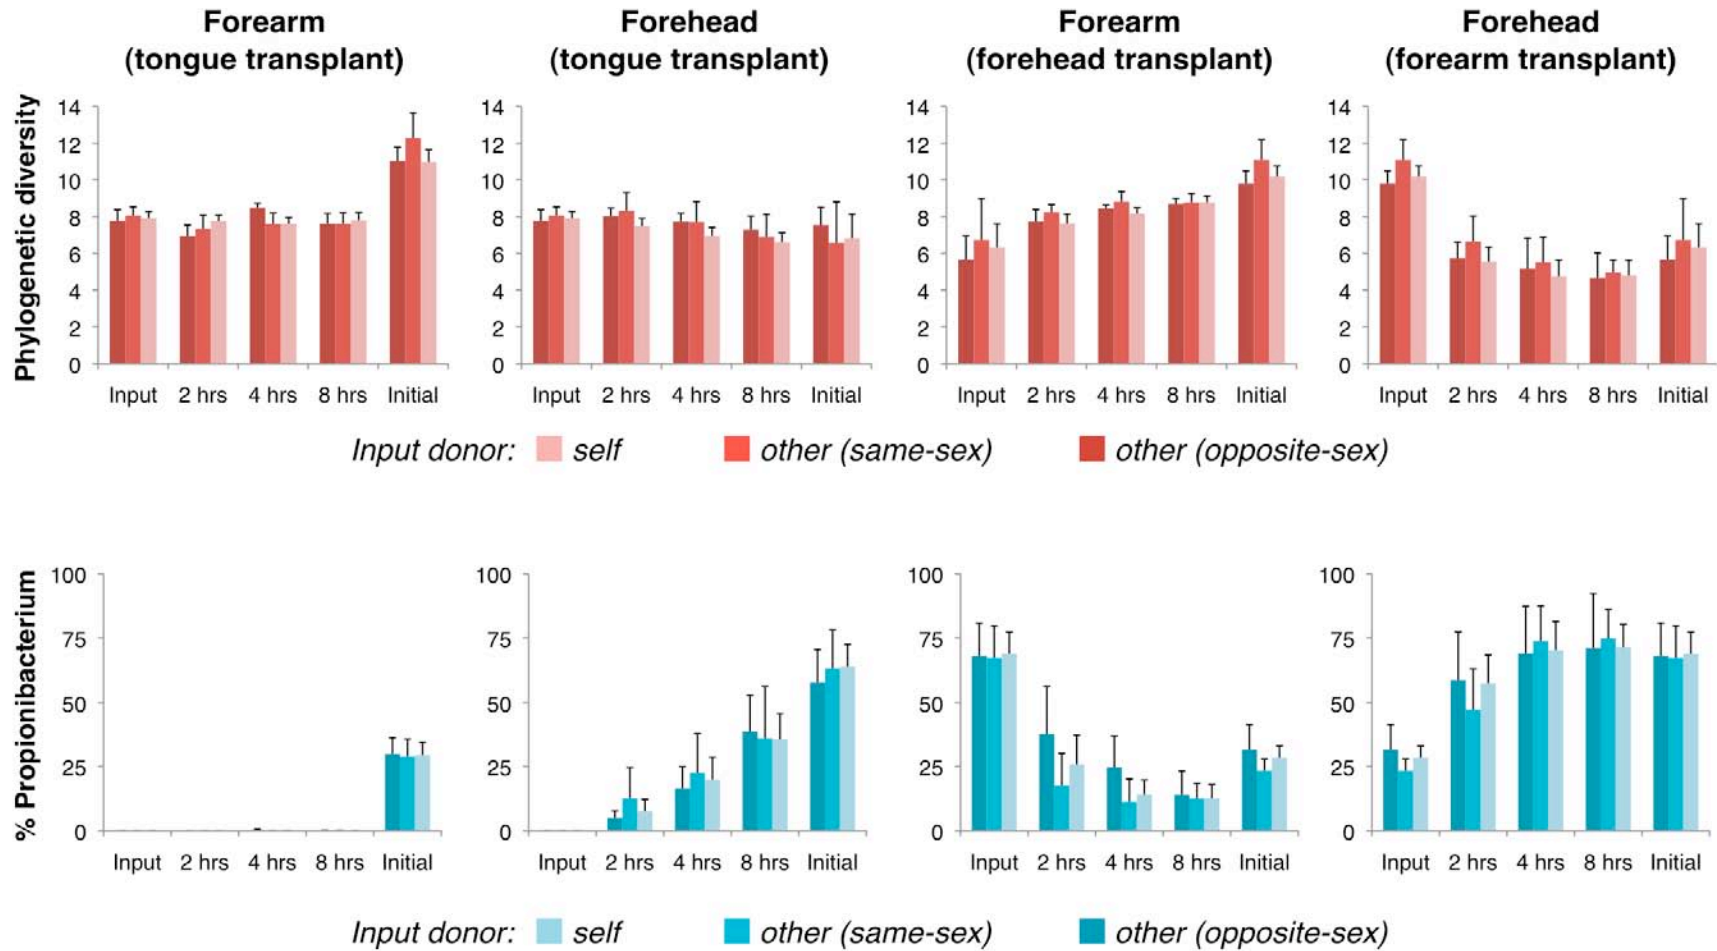

**Fig. S21.** Transplant donor effects on the phylogenetic diversity (upper panels) and relative abundance of *Propionibacterium* spp. (lower panels) within assembling skin communities post-disinfection and transplant with foreign (input) microbiotas. Light-shaded bars, intrapersonal transplant; medium-shaded bars, interpersonal transplant from same-sex individual; dark-shaded bars, interpersonal transplant from opposite-sex individual.

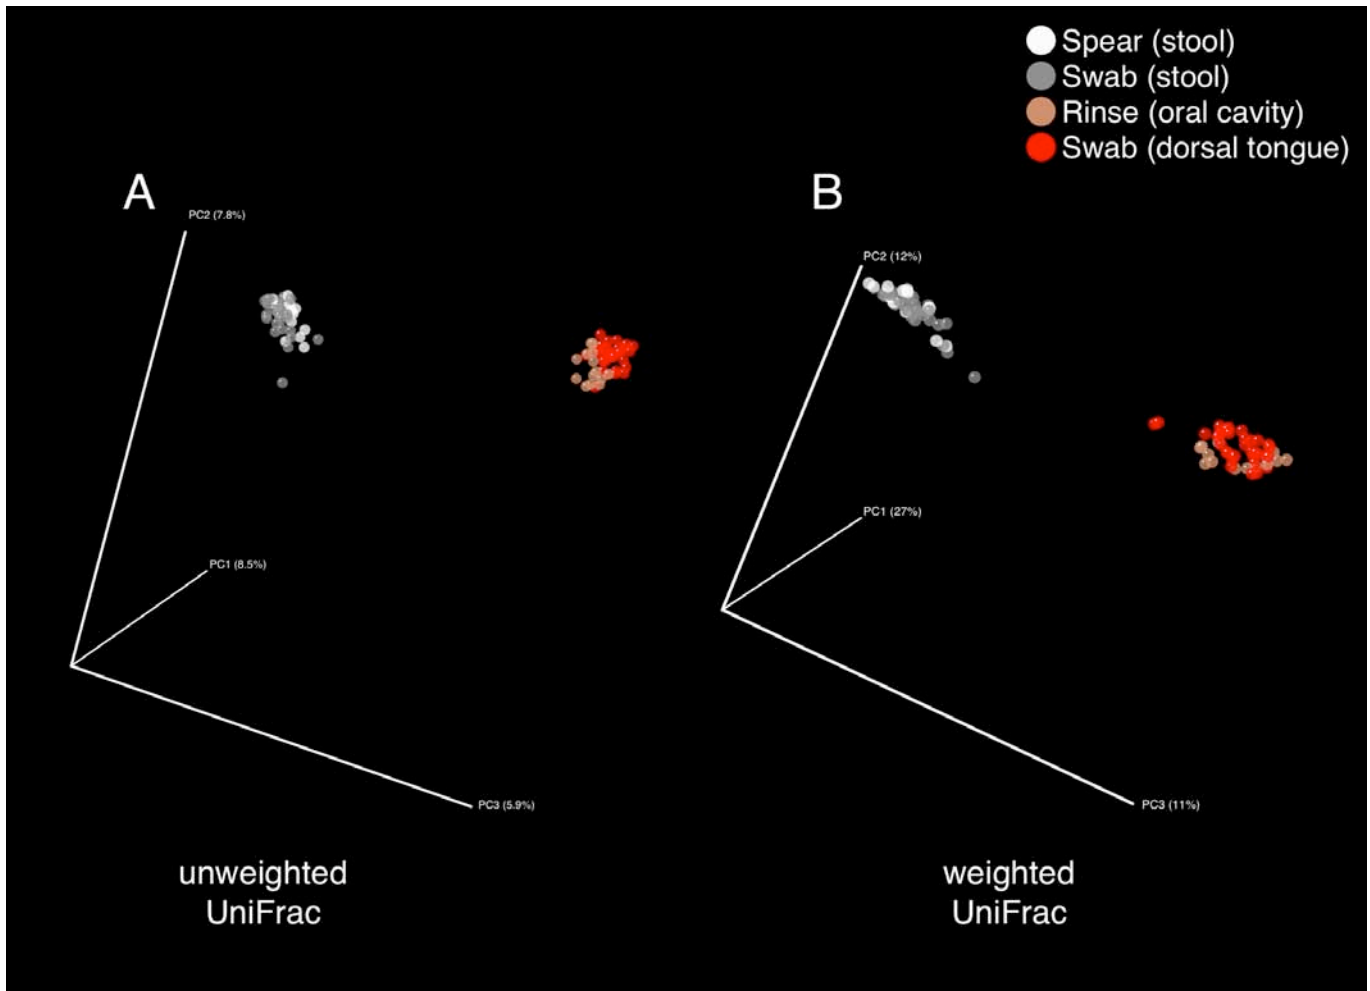

**Fig. S22.** Methods developed for this study. Stool samples collected off used bathroom tissue were compositionally indistinguishable from stool collected by stabbing the swab directly into the fecal material as shown using PCoA of (A) unweighted and (B) weighted UniFrac distances. Likewise, oral cavity samples collected using dorsal tongue swabs clustered tightly with those collected using sterile water rinses.

**Table S1.** Sample information

| #  | SampleID | No. of reads | Sample site (anatomical)      | Sample site (common)         | Body habitat | Host sex, indiv | Day     | Sample method              | Study      | Treatment |
|----|----------|--------------|-------------------------------|------------------------------|--------------|-----------------|---------|----------------------------|------------|-----------|
| 1  | F11Aptl  | 748          | left axilla                   | left armpit                  | Skin         | F1              | 6/17/08 | swab w/ sterile saline     | whole-body | none      |
| 2  | F11Apr   | 506          | right axilla                  | right armpit                 | Skin         | F1              | 6/17/08 | swab w/ sterile saline     | whole-body | none      |
| 3  | F11Ewxl  | 880          | left external auditory canal  | left outer ear canal/earwax  | EAC          | F1              | 6/17/08 | swab                       | whole-body | none      |
| 4  | F11Ewxr  | 811          | right external auditory canal | right outer ear canal/earwax | EAC          | F1              | 6/17/08 | swab                       | whole-body | none      |
| 5  | F11Fcsp  | 586          | stool                         | stool                        | Gut          | F1              | 6/17/08 | swab stabbed into stool    | whole-body | none      |
| 6  | F11Fcsw  | 1002         | stool                         | stool                        | Gut          | F1              | 6/17/08 | swab off used toilet paper | whole-body | none      |
| 7  | F11Forl  | 790          | left volar forearm            | left forearm                 | Skin         | F1              | 6/17/08 | swab w/ sterile saline     | whole-body | none      |
| 8  | F11Forr  | 756          | right volar forearm           | right forearm                | Skin         | F1              | 6/17/08 | swab w/ sterile saline     | whole-body | none      |
| 9  | F11Fotl  | 962          | left plantar foot             | left sole of foot            | Skin         | F1              | 6/17/08 | swab w/ sterile saline     | whole-body | none      |
| 10 | F11Fotr  | 854          | right plantar foot            | right sole of foot           | Skin         | F1              | 6/17/08 | swab w/ sterile saline     | whole-body | none      |
| 11 | F11Frhd  | 855          | forehead                      | forehead                     | Skin         | F1              | 6/17/08 | swab w/ sterile saline     | whole-body | none      |
| 12 | F11Hair  | 656          | hair on head                  | hair on head                 | Hair         | F1              | 6/17/08 | swab w/ sterile saline     | whole-body | none      |
| 13 | F11Indl  | 829          | left palmar index finger      | left index finger            | Skin         | F1              | 6/17/08 | swab w/ sterile saline     | whole-body | none      |
| 14 | F11Indr  | 763          | right palmar index finger     | right index finger           | Skin         | F1              | 6/17/08 | swab w/ sterile saline     | whole-body | none      |
| 15 | F11Knel  | 608          | left popliteal fossa          | left back of knees           | Skin         | F1              | 6/17/08 | swab w/ sterile saline     | whole-body | none      |
| 16 | F11Kner  | 625          | right popliteal fossa         | right back of knees          | Skin         | F1              | 6/17/08 | swab w/ sterile saline     | whole-body | none      |
| 17 | F11Labi  | 999          | labia minora                  | labia minora                 | Skin         | F1              | 6/17/08 | swab w/ sterile saline     | whole-body | none      |
| 18 | F11Mout  | 925          | oral cavity                   | mouth                        | Oral cavity  | F1              | 6/17/08 | rinse w/ sterile water     | whole-body | none      |
| 19 | F11Navl  | 1247         | umbilicus                     | navel                        | Skin         | F1              | 6/17/08 | swab w/ sterile saline     | whole-body | none      |
| 20 | F11Nose  | 955          | external nose                 | external nose                | Skin         | F1              | 6/17/08 | swab w/ sterile saline     | whole-body | none      |
| 21 | F11Nstl  | 973          | left naris                    | left nostril                 | Nostril      | F1              | 6/17/08 | swab w/ sterile saline     | whole-body | none      |
| 22 | F11Nstr  | 1099         | right naris                   | right nostril                | Nostril      | F1              | 6/17/08 | swab w/ sterile saline     | whole-body | none      |
| 23 | F11Pinl  | 820          | left lateral pinna            | left outer ear               | Skin         | F1              | 6/17/08 | swab w/ sterile saline     | whole-body | none      |
| 24 | F11Pinr  | 1273         | right lateral pinna           | right outer ear              | Skin         | F1              | 6/17/08 | swab w/ sterile saline     | whole-body | none      |
| 25 | F11Plml  | 718          | left palm                     | left palm                    | Skin         | F1              | 6/17/08 | swab w/ sterile saline     | whole-body | none      |
| 26 | F11Plmr  | 684          | right palm                    | right palm                   | Skin         | F1              | 6/17/08 | swab w/ sterile saline     | whole-body | none      |
| 27 | F11Tong  | 1625         | dorsal surface of tongue      | tongue                       | Oral cavity  | F1              | 6/17/08 | swab                       | whole-body | none      |
| 28 | F12Aptl  | 1064         | left axilla                   | left armpit                  | Skin         | F1              | 6/18/08 | swab w/ sterile saline     | whole-body | none      |
| 29 | F12Apr   | 967          | right axilla                  | right armpit                 | Skin         | F1              | 6/18/08 | swab w/ sterile saline     | whole-body | none      |
| 30 | F12Ewxl  | 896          | left external auditory canal  | left outer ear canal/earwax  | EAC          | F1              | 6/18/08 | swab                       | whole-body | none      |
| 31 | F12Ewxr  | 538          | right external auditory canal | right outer ear canal/earwax | EAC          | F1              | 6/18/08 | swab                       | whole-body | none      |
| 32 | F12Fcsp  | 925          | stool                         | stool                        | Gut          | F1              | 6/18/08 | swab stabbed into stool    | whole-body | none      |
| 33 | F12Fcsw  | 914          | stool                         | stool                        | Gut          | F1              | 6/18/08 | swab off used toilet paper | whole-body | none      |
| 34 | F12Forl  | 575          | left volar forearm            | left forearm                 | Skin         | F1              | 6/18/08 | swab w/ sterile saline     | whole-body | none      |
| 35 | F12Forr  | 707          | right volar forearm           | right forearm                | Skin         | F1              | 6/18/08 | swab w/ sterile saline     | whole-body | none      |
| 36 | F12Fotl  | 1678         | left plantar foot             | left sole of foot            | Skin         | F1              | 6/18/08 | swab w/ sterile saline     | whole-body | none      |



**Table S1.** Sample information

| #  | SampleID | No. of reads | Sample site (anatomical)  | Sample site (common)   | Body habitat | Host sex, indiv | Day     | Sample method              | Study      | Treatment |
|----|----------|--------------|---------------------------|------------------------|--------------|-----------------|---------|----------------------------|------------|-----------|
| 37 | F12Fotr  | 1560         | right plantar foot        | right sole of foot     | Skin         | F1              | 6/18/08 | swab w/ sterile saline     | whole-body | none      |
| 38 | F12Frhd  | 658          | forehead                  | forehead               | Skin         | F1              | 6/18/08 | swab w/ sterile saline     | whole-body | none      |
| 39 | F12Hair  | 868          | hair on head              | hair on head           | Hair         | F1              | 6/18/08 | swab w/ sterile saline     | whole-body | none      |
| 40 | F12Inld  | 1401         | left palmar index finger  | left index finger      | Skin         | F1              | 6/18/08 | swab w/ sterile saline     | whole-body | none      |
| 41 | F12Indr  | 1185         | right palmar index finger | right index finger     | Skin         | F1              | 6/18/08 | swab w/ sterile saline     | whole-body | none      |
| 42 | F12Knel  | 679          | left popliteal fossa      | left back of knees     | Skin         | F1              | 6/18/08 | swab w/ sterile saline     | whole-body | none      |
| 43 | F12Kner  | 1046         | right popliteal fossa     | right back of knees    | Skin         | F1              | 6/18/08 | swab w/ sterile saline     | whole-body | none      |
| 44 | F12Labi  | 1629         | labia minora              | labia minora           | Skin         | F1              | 6/18/08 | swab w/ sterile saline     | whole-body | none      |
| 45 | F12Mout  | 1694         | oral cavity               | mouth                  | Oral cavity  | F1              | 6/18/08 | rinse w/ sterile water     | whole-body | none      |
| 46 | F12Navl  | 1708         | umbilicus                 | navel                  | Skin         | F1              | 6/18/08 | swab w/ sterile saline     | whole-body | none      |
| 47 | F12Nose  | 1311         | external nose             | external nose          | Skin         | F1              | 6/18/08 | swab w/ sterile saline     | whole-body | none      |
| 48 | F12Nstl  | 1495         | left naris                | left nostril           | Nostril      | F1              | 6/18/08 | swab w/ sterile saline     | whole-body | none      |
| 49 | F12Nstr  | 1433         | right naris               | right nostril          | Nostril      | F1              | 6/18/08 | swab w/ sterile saline     | whole-body | none      |
| 50 | F12Pinl  | 1744         | left lateral pinna        | left outer ear         | Skin         | F1              | 6/18/08 | swab w/ sterile saline     | whole-body | none      |
| 51 | F12Pinr  | 1317         | right lateral pinna       | right outer ear        | Skin         | F1              | 6/18/08 | swab w/ sterile saline     | whole-body | none      |
| 52 | F12Plml  | 1336         | left palm                 | left palm              | Skin         | F1              | 6/18/08 | swab w/ sterile saline     | whole-body | none      |
| 53 | F12Plmr  | 1533         | right palm                | right palm             | Skin         | F1              | 6/18/08 | swab w/ sterile saline     | whole-body | none      |
| 54 | F12Tong  | 1977         | dorsal surface of tongue  | tongue                 | Oral cavity  | F1              | 6/18/08 | swab                       | whole-body | none      |
| 55 | F13Ewax  | 1222         | external auditory canal   | outer ear canal/earwax | EAC          | F1              | 9/17/08 | swab                       | whole-body | none      |
| 56 | F13Fcsw  | 1286         | stool                     | stool                  | Gut          | F1              | 9/17/08 | swab off used toilet paper | whole-body | none      |
| 57 | F13Fotl  | 988          | left plantar foot         | left sole of foot      | Skin         | F1              | 9/17/08 | swab w/ sterile saline     | whole-body | none      |
| 58 | F13Fotr  | 1396         | right plantar foot        | right sole of foot     | Skin         | F1              | 9/17/08 | swab w/ sterile saline     | whole-body | none      |
| 59 | F13Frhd  | 1001         | forehead                  | forehead               | Skin         | F1              | 9/17/08 | swab w/ sterile saline     | whole-body | none      |
| 60 | F13Knee  | 1252         | popliteal fossae          | back of knees          | Skin         | F1              | 9/17/08 | swab w/ sterile saline     | whole-body | none      |
| 61 | F13Nost  | 1343         | nares                     | nostrils               | Nostril      | F1              | 9/17/08 | swab w/ sterile saline     | whole-body | none      |
| 62 | F13Plml  | 1093         | left palm                 | left palm              | Skin         | F1              | 9/17/08 | swab w/ sterile saline     | whole-body | none      |
| 63 | F13Plmr  | 924          | right palm                | right palm             | Skin         | F1              | 9/17/08 | swab w/ sterile saline     | whole-body | none      |
| 64 | F13Tong  | 2277         | dorsal surface of tongue  | tongue                 | Oral cavity  | F1              | 9/17/08 | swab                       | whole-body | none      |
| 65 | F14Ewax  | 1143         | external auditory canal   | outer ear canal/earwax | EAC          | F1              | 9/18/08 | swab                       | whole-body | none      |
| 66 | F14Fcsw  | 1884         | stool                     | stool                  | Gut          | F1              | 9/18/08 | swab off used toilet paper | whole-body | none      |
| 67 | F14Fotl  | 772          | left plantar foot         | left sole of foot      | Skin         | F1              | 9/18/08 | swab w/ sterile saline     | whole-body | none      |
| 68 | F14Fotr  | 1966         | right plantar foot        | right sole of foot     | Skin         | F1              | 9/18/08 | swab w/ sterile saline     | whole-body | none      |
| 69 | F14Frhd  | 1194         | forehead                  | forehead               | Skin         | F1              | 9/18/08 | swab w/ sterile saline     | whole-body | none      |
| 70 | F14Knee  | 1042         | popliteal fossae          | back of knees          | Skin         | F1              | 9/18/08 | swab w/ sterile saline     | whole-body | none      |
| 71 | F14Nost  | 962          | nares                     | nostrils               | Nostril      | F1              | 9/18/08 | swab w/ sterile saline     | whole-body | none      |
| 72 | F14Plml  | 886          | left palm                 | left palm              | Skin         | F1              | 9/18/08 | swab w/ sterile saline     | whole-body | none      |

**Table S1.** Sample information

| #   | SampleID | No. of reads | Sample site (anatomical)      | Sample site (common)         | Body habitat | Host sex, indiv | Day     | Sample method              | Study      | Treatment |
|-----|----------|--------------|-------------------------------|------------------------------|--------------|-----------------|---------|----------------------------|------------|-----------|
| 73  | F14Plmr  | 1110         | right palm                    | right palm                   | Skin         | F1              | 9/18/08 | swab w/ sterile saline     | whole-body | none      |
| 74  | F14Tong  | 1616         | dorsal surface of tongue      | tongue                       | Oral cavity  | F1              | 9/18/08 | swab                       | whole-body | none      |
| 75  | F21Aptl  | 1855         | left axilla                   | left armpit                  | Skin         | F2              | 6/17/08 | swab w/ sterile saline     | whole-body | none      |
| 76  | F21Aptr  | 1243         | right axilla                  | right armpit                 | Skin         | F2              | 6/17/08 | swab w/ sterile saline     | whole-body | none      |
| 77  | F21Ewxl  | 1912         | left external auditory canal  | left outer ear canal/earwax  | EAC          | F2              | 6/17/08 | swab                       | whole-body | none      |
| 78  | F21Ewxr  | 1844         | right external auditory canal | right outer ear canal/earwax | EAC          | F2              | 6/17/08 | swab                       | whole-body | none      |
| 79  | F21Fcsp  | 965          | stool                         | stool                        | Gut          | F2              | 6/17/08 | swab stabbed into stool    | whole-body | none      |
| 80  | F21Fcsw  | 1263         | stool                         | stool                        | Gut          | F2              | 6/17/08 | swab off used toilet paper | whole-body | none      |
| 81  | F21Forl  | 1089         | left volar forearm            | left forearm                 | Skin         | F2              | 6/17/08 | swab w/ sterile saline     | whole-body | none      |
| 82  | F21Forr  | 1627         | right volar forearm           | right forearm                | Skin         | F2              | 6/17/08 | swab w/ sterile saline     | whole-body | none      |
| 83  | F21Fotl  | 1695         | left plantar foot             | left sole of foot            | Skin         | F2              | 6/17/08 | swab w/ sterile saline     | whole-body | none      |
| 84  | F21Fotr  | 825          | right plantar foot            | right sole of foot           | Skin         | F2              | 6/17/08 | swab w/ sterile saline     | whole-body | none      |
| 85  | F21Frhd  | 1924         | forehead                      | forehead                     | Skin         | F2              | 6/17/08 | swab w/ sterile saline     | whole-body | none      |
| 86  | F21Hair  | 1271         | hair on head                  | hair on head                 | Hair         | F2              | 6/17/08 | swab w/ sterile saline     | whole-body | none      |
| 87  | F21Indl  | 1235         | left palmar index finger      | left index finger            | Skin         | F2              | 6/17/08 | swab w/ sterile saline     | whole-body | none      |
| 88  | F21Indr  | 937          | right palmar index finger     | right index finger           | Skin         | F2              | 6/17/08 | swab w/ sterile saline     | whole-body | none      |
| 89  | F21Knel  | 1194         | left popliteal fossa          | left back of knees           | Skin         | F2              | 6/17/08 | swab w/ sterile saline     | whole-body | none      |
| 90  | F21Kner  | 2036         | right popliteal fossa         | right back of knees          | Skin         | F2              | 6/17/08 | swab w/ sterile saline     | whole-body | none      |
| 91  | F21Labi  | 1709         | labia minora                  | labia minora                 | Skin         | F2              | 6/17/08 | swab w/ sterile saline     | whole-body | none      |
| 92  | F21Mout  | 1847         | oral cavity                   | mouth                        | Oral cavity  | F2              | 6/17/08 | rinse w/ sterile water     | whole-body | none      |
| 93  | F21Navl  | 1904         | umbilicus                     | navel                        | Skin         | F2              | 6/17/08 | swab w/ sterile saline     | whole-body | none      |
| 94  | F21Nose  | 1754         | external nose                 | external nose                | Skin         | F2              | 6/17/08 | swab w/ sterile saline     | whole-body | none      |
| 95  | F21Nstl  | 1418         | left naris                    | left nostril                 | Nostril      | F2              | 6/17/08 | swab w/ sterile saline     | whole-body | none      |
| 96  | F21Nstr  | 1157         | right naris                   | right nostril                | Nostril      | F2              | 6/17/08 | swab w/ sterile saline     | whole-body | none      |
| 97  | F21Pinr  | 1333         | right lateral pinna           | right outer ear              | Skin         | F2              | 6/17/08 | swab w/ sterile saline     | whole-body | none      |
| 98  | F21Plml  | 1534         | left palm                     | left palm                    | Skin         | F2              | 6/17/08 | swab w/ sterile saline     | whole-body | none      |
| 99  | F21Plmr  | 1514         | right palm                    | right palm                   | Skin         | F2              | 6/17/08 | swab w/ sterile saline     | whole-body | none      |
| 100 | F21Tong  | 1599         | dorsal surface of tongue      | tongue                       | Oral cavity  | F2              | 6/17/08 | swab                       | whole-body | none      |
| 101 | F22Aptl  | 898          | left axilla                   | left armpit                  | Skin         | F2              | 6/18/08 | swab w/ sterile saline     | whole-body | none      |
| 102 | F22Aptr  | 1457         | right axilla                  | right armpit                 | Skin         | F2              | 6/18/08 | swab w/ sterile saline     | whole-body | none      |
| 103 | F22Ewxl  | 1987         | left external auditory canal  | left outer ear canal/earwax  | EAC          | F2              | 6/18/08 | swab                       | whole-body | none      |
| 104 | F22Ewxr  | 1682         | right external auditory canal | right outer ear canal/earwax | EAC          | F2              | 6/18/08 | swab                       | whole-body | none      |
| 105 | F22Fcsp  | 1500         | stool                         | stool                        | Gut          | F2              | 6/18/08 | swab stabbed into stool    | whole-body | none      |
| 106 | F22Fcsw  | 1398         | stool                         | stool                        | Gut          | F2              | 6/18/08 | swab off used toilet paper | whole-body | none      |
| 107 | F22Forl  | 1079         | left volar forearm            | left forearm                 | Skin         | F2              | 6/18/08 | swab w/ sterile saline     | whole-body | none      |
| 108 | F22Forr  | 790          | right volar forearm           | right forearm                | Skin         | F2              | 6/18/08 | swab w/ sterile saline     | whole-body | none      |

**Table S1.** Sample information

| #   | SampleID | No. of reads | Sample site (anatomical)  | Sample site (common)   | Body habitat | Host sex, indiv | Day     | Sample method              | Study      | Treatment |
|-----|----------|--------------|---------------------------|------------------------|--------------|-----------------|---------|----------------------------|------------|-----------|
| 109 | F22Fotl  | 1486         | left plantar foot         | left sole of foot      | Skin         | F2              | 6/18/08 | swab w/ sterile saline     | whole-body | none      |
| 110 | F22Fotr  | 1291         | right plantar foot        | right sole of foot     | Skin         | F2              | 6/18/08 | swab w/ sterile saline     | whole-body | none      |
| 111 | F22Frhd  | 1605         | forehead                  | forehead               | Skin         | F2              | 6/18/08 | swab w/ sterile saline     | whole-body | none      |
| 112 | F22Hair  | 1648         | hair on head              | hair on head           | Hair         | F2              | 6/18/08 | swab w/ sterile saline     | whole-body | none      |
| 113 | F22Indl  | 1371         | left palmar index finger  | left index finger      | Skin         | F2              | 6/18/08 | swab w/ sterile saline     | whole-body | none      |
| 114 | F22Indr  | 1635         | right palmar index finger | right index finger     | Skin         | F2              | 6/18/08 | swab w/ sterile saline     | whole-body | none      |
| 115 | F22Knel  | 1576         | left popliteal fossa      | left back of knees     | Skin         | F2              | 6/18/08 | swab w/ sterile saline     | whole-body | none      |
| 116 | F22Kner  | 1031         | right popliteal fossa     | right back of knees    | Skin         | F2              | 6/18/08 | swab w/ sterile saline     | whole-body | none      |
| 117 | F22Labi  | 1641         | labia minora              | labia minora           | Skin         | F2              | 6/18/08 | swab w/ sterile saline     | whole-body | none      |
| 118 | F22Mout  | 2623         | oral cavity               | mouth                  | Oral cavity  | F2              | 6/18/08 | rinse w/ sterile water     | whole-body | none      |
| 119 | F22Navl  | 914          | umbilicus                 | navel                  | Skin         | F2              | 6/18/08 | swab w/ sterile saline     | whole-body | none      |
| 120 | F22Nose  | 2020         | external nose             | external nose          | Skin         | F2              | 6/18/08 | swab w/ sterile saline     | whole-body | none      |
| 121 | F22Nstl  | 1350         | left naris                | left nostril           | Nostril      | F2              | 6/18/08 | swab w/ sterile saline     | whole-body | none      |
| 122 | F22Nstr  | 1450         | right naris               | right nostril          | Nostril      | F2              | 6/18/08 | swab w/ sterile saline     | whole-body | none      |
| 123 | F22Pinl  | 1284         | left lateral pinna        | left outer ear         | Skin         | F2              | 6/18/08 | swab w/ sterile saline     | whole-body | none      |
| 124 | F22Pinr  | 1787         | right lateral pinna       | right outer ear        | Skin         | F2              | 6/18/08 | swab w/ sterile saline     | whole-body | none      |
| 125 | F22Plml  | 1784         | left palm                 | left palm              | Skin         | F2              | 6/18/08 | swab w/ sterile saline     | whole-body | none      |
| 126 | F22Plmr  | 1609         | right palm                | right palm             | Skin         | F2              | 6/18/08 | swab w/ sterile saline     | whole-body | none      |
| 127 | F22Tong  | 2460         | dorsal surface of tongue  | tongue                 | Oral cavity  | F2              | 6/18/08 | swab                       | whole-body | none      |
| 128 | F23Ewax  | 1249         | external auditory canal   | outer ear canal/earwax | EAC          | F2              | 9/17/08 | swab                       | whole-body | none      |
| 129 | F23Fcsw  | 1421         | stool                     | stool                  | Gut          | F2              | 9/17/08 | swab off used toilet paper | whole-body | none      |
| 130 | F23Fotl  | 1123         | left plantar foot         | left sole of foot      | Skin         | F2              | 9/17/08 | swab w/ sterile saline     | whole-body | none      |
| 131 | F23Fotr  | 1119         | right plantar foot        | right sole of foot     | Skin         | F2              | 9/17/08 | swab w/ sterile saline     | whole-body | none      |
| 132 | F23Frhd  | 1799         | forehead                  | forehead               | Skin         | F2              | 9/17/08 | swab w/ sterile saline     | whole-body | none      |
| 133 | F23Knee  | 1073         | popliteal fossae          | back of knees          | Skin         | F2              | 9/17/08 | swab w/ sterile saline     | whole-body | none      |
| 134 | F23Nost  | 1401         | nares                     | nostrils               | Nostril      | F2              | 9/17/08 | swab w/ sterile saline     | whole-body | none      |
| 135 | F23Plml  | 1135         | left palm                 | left palm              | Skin         | F2              | 9/17/08 | swab w/ sterile saline     | whole-body | none      |
| 136 | F23Plmr  | 1147         | right palm                | right palm             | Skin         | F2              | 9/17/08 | swab w/ sterile saline     | whole-body | none      |
| 137 | F23Tong  | 2194         | dorsal surface of tongue  | tongue                 | Oral cavity  | F2              | 9/17/08 | swab                       | whole-body | none      |
| 138 | F24Ewax  | 1305         | external auditory canal   | outer ear canal/earwax | EAC          | F2              | 9/18/08 | swab                       | whole-body | none      |
| 139 | F24Fcsw  | 1707         | stool                     | stool                  | Gut          | F2              | 9/18/08 | swab off used toilet paper | whole-body | none      |
| 140 | F24Fotl  | 1394         | left plantar foot         | left sole of foot      | Skin         | F2              | 9/18/08 | swab w/ sterile saline     | whole-body | none      |
| 141 | F24Fotr  | 1147         | right plantar foot        | right sole of foot     | Skin         | F2              | 9/18/08 | swab w/ sterile saline     | whole-body | none      |
| 142 | F24Frhd  | 1409         | forehead                  | forehead               | Skin         | F2              | 9/18/08 | swab w/ sterile saline     | whole-body | none      |
| 143 | F24Knee  | 1035         | popliteal fossae          | back of knees          | Skin         | F2              | 9/18/08 | swab w/ sterile saline     | whole-body | none      |
| 144 | F24Nost  | 1286         | nares                     | nostrils               | Nostril      | F2              | 9/18/08 | swab w/ sterile saline     | whole-body | none      |

**Table S1.** Sample information

| #   | SampleID | No. of reads | Sample site (anatomical)      | Sample site (common)         | Body habitat | Host sex, indiv | Day     | Sample method              | Study      | Treatment |
|-----|----------|--------------|-------------------------------|------------------------------|--------------|-----------------|---------|----------------------------|------------|-----------|
| 145 | F24Plml  | 1112         | left palm                     | left palm                    | Skin         | F2              | 9/18/08 | swab w/ sterile saline     | whole-body | none      |
| 146 | F24Plmr  | 1159         | right palm                    | right palm                   | Skin         | F2              | 9/18/08 | swab w/ sterile saline     | whole-body | none      |
| 147 | F24Tong  | 1735         | dorsal surface of tongue      | tongue                       | Oral cavity  | F2              | 9/18/08 | swab                       | whole-body | none      |
| 148 | F31Aptl  | 819          | left axilla                   | left armpit                  | Skin         | F3              | 6/17/08 | swab w/ sterile saline     | whole-body | none      |
| 149 | F31Aptr  | 714          | right axilla                  | right armpit                 | Skin         | F3              | 6/17/08 | swab w/ sterile saline     | whole-body | none      |
| 150 | F31Ewxr  | 1566         | right external auditory canal | right outer ear canal/earwax | EAC          | F3              | 6/17/08 | swab                       | whole-body | none      |
| 151 | F31Fcsp  | 1048         | stool                         | stool                        | Gut          | F3              | 6/17/08 | swab stabbed into stool    | whole-body | none      |
| 152 | F31Fcsw  | 1832         | stool                         | stool                        | Gut          | F3              | 6/17/08 | swab off used toilet paper | whole-body | none      |
| 153 | F31Forl  | 1613         | left volar forearm            | left forearm                 | Skin         | F3              | 6/17/08 | swab w/ sterile saline     | whole-body | none      |
| 154 | F31Forr  | 1952         | right volar forearm           | right forearm                | Skin         | F3              | 6/17/08 | swab w/ sterile saline     | whole-body | none      |
| 155 | F31Fotl  | 2205         | left plantar foot             | left sole of foot            | Skin         | F3              | 6/17/08 | swab w/ sterile saline     | whole-body | none      |
| 156 | F31Fotr  | 1258         | right plantar foot            | right sole of foot           | Skin         | F3              | 6/17/08 | swab w/ sterile saline     | whole-body | none      |
| 157 | F31Frhd  | 1253         | forehead                      | forehead                     | Skin         | F3              | 6/17/08 | swab w/ sterile saline     | whole-body | none      |
| 158 | F31Hair  | 704          | hair on head                  | hair on head                 | Hair         | F3              | 6/17/08 | swab w/ sterile saline     | whole-body | none      |
| 159 | F31Indl  | 1196         | left palmar index finger      | left index finger            | Skin         | F3              | 6/17/08 | swab w/ sterile saline     | whole-body | none      |
| 160 | F31Indr  | 1055         | right palmar index finger     | right index finger           | Skin         | F3              | 6/17/08 | swab w/ sterile saline     | whole-body | none      |
| 161 | F31Knel  | 1158         | left popliteal fossa          | left back of knees           | Skin         | F3              | 6/17/08 | swab w/ sterile saline     | whole-body | none      |
| 162 | F31Kner  | 815          | right popliteal fossa         | right back of knees          | Skin         | F3              | 6/17/08 | swab w/ sterile saline     | whole-body | none      |
| 163 | F31Labi  | 2427         | labia minora                  | labia minora                 | Skin         | F3              | 6/17/08 | swab w/ sterile saline     | whole-body | none      |
| 164 | F31Mout  | 1368         | oral cavity                   | mouth                        | Oral cavity  | F3              | 6/17/08 | rinse w/ sterile water     | whole-body | none      |
| 165 | F31Nose  | 1327         | external nose                 | external nose                | Skin         | F3              | 6/17/08 | swab w/ sterile saline     | whole-body | none      |
| 166 | F31Nstl  | 624          | left naris                    | left nostril                 | Nostril      | F3              | 6/17/08 | swab w/ sterile saline     | whole-body | none      |
| 167 | F31Nstr  | 969          | right naris                   | right nostril                | Nostril      | F3              | 6/17/08 | swab w/ sterile saline     | whole-body | none      |
| 168 | F31Pinl  | 819          | left lateral pinna            | left outer ear               | Skin         | F3              | 6/17/08 | swab w/ sterile saline     | whole-body | none      |
| 169 | F31Pinr  | 763          | right lateral pinna           | right outer ear              | Skin         | F3              | 6/17/08 | swab w/ sterile saline     | whole-body | none      |
| 170 | F31Plml  | 668          | left palm                     | left palm                    | Skin         | F3              | 6/17/08 | swab w/ sterile saline     | whole-body | none      |
| 171 | F31Plmr  | 1821         | right palm                    | right palm                   | Skin         | F3              | 6/17/08 | swab w/ sterile saline     | whole-body | none      |
| 172 | F31Tong  | 2013         | dorsal surface of tongue      | tongue                       | Oral cavity  | F3              | 6/17/08 | swab                       | whole-body | none      |
| 173 | F32Aptl  | 813          | left axilla                   | left armpit                  | Skin         | F3              | 6/18/08 | swab w/ sterile saline     | whole-body | none      |
| 174 | F32Aptr  | 1295         | right axilla                  | right armpit                 | Skin         | F3              | 6/18/08 | swab w/ sterile saline     | whole-body | none      |
| 175 | F32Ewxl  | 925          | left external auditory canal  | left outer ear canal/earwax  | EAC          | F3              | 6/18/08 | swab                       | whole-body | none      |
| 176 | F32Ewxr  | 1204         | right external auditory canal | right outer ear canal/earwax | EAC          | F3              | 6/18/08 | swab                       | whole-body | none      |
| 177 | F32Fcsp  | 2163         | stool                         | stool                        | Gut          | F3              | 6/18/08 | swab stabbed into stool    | whole-body | none      |
| 178 | F32Fcsw  | 1914         | stool                         | stool                        | Gut          | F3              | 6/18/08 | swab off used toilet paper | whole-body | none      |
| 179 | F32Forl  | 1390         | left volar forearm            | left forearm                 | Skin         | F3              | 6/18/08 | swab w/ sterile saline     | whole-body | none      |
| 180 | F32Forr  | 1229         | right volar forearm           | right forearm                | Skin         | F3              | 6/18/08 | swab w/ sterile saline     | whole-body | none      |

**Table S1.** Sample information

| #   | SampleID | No. of reads | Sample site (anatomical)  | Sample site (common)   | Body habitat | Host sex, indiv | Day     | Sample method              | Study      | Treatment |
|-----|----------|--------------|---------------------------|------------------------|--------------|-----------------|---------|----------------------------|------------|-----------|
| 181 | F32Fotl  | 1182         | left plantar foot         | left sole of foot      | Skin         | F3              | 6/18/08 | swab w/ sterile saline     | whole-body | none      |
| 182 | F32Fotr  | 1460         | right plantar foot        | right sole of foot     | Skin         | F3              | 6/18/08 | swab w/ sterile saline     | whole-body | none      |
| 183 | F32Frhd  | 2397         | forehead                  | forehead               | Skin         | F3              | 6/18/08 | swab w/ sterile saline     | whole-body | none      |
| 184 | F32Hair  | 1197         | hair on head              | hair on head           | Hair         | F3              | 6/18/08 | swab w/ sterile saline     | whole-body | none      |
| 185 | F32Indl  | 1212         | left palmar index finger  | left index finger      | Skin         | F3              | 6/18/08 | swab w/ sterile saline     | whole-body | none      |
| 186 | F32Indr  | 2632         | right palmar index finger | right index finger     | Skin         | F3              | 6/18/08 | swab w/ sterile saline     | whole-body | none      |
| 187 | F32Knel  | 627          | left popliteal fossa      | left back of knees     | Skin         | F3              | 6/18/08 | swab w/ sterile saline     | whole-body | none      |
| 188 | F32Kner  | 1338         | right popliteal fossa     | right back of knees    | Skin         | F3              | 6/18/08 | swab w/ sterile saline     | whole-body | none      |
| 189 | F32Labi  | 1590         | labia minora              | labia minora           | Skin         | F3              | 6/18/08 | swab w/ sterile saline     | whole-body | none      |
| 190 | F32Mout  | 1699         | oral cavity               | mouth                  | Oral cavity  | F3              | 6/18/08 | rinse w/ sterile water     | whole-body | none      |
| 191 | F32Navl  | 1119         | umbilicus                 | navel                  | Skin         | F3              | 6/18/08 | swab w/ sterile saline     | whole-body | none      |
| 192 | F32Nose  | 2341         | external nose             | external nose          | Skin         | F3              | 6/18/08 | swab w/ sterile saline     | whole-body | none      |
| 193 | F32Nstl  | 1669         | left naris                | left nostril           | Nostril      | F3              | 6/18/08 | swab w/ sterile saline     | whole-body | none      |
| 194 | F32Nstr  | 2305         | right naris               | right nostril          | Nostril      | F3              | 6/18/08 | swab w/ sterile saline     | whole-body | none      |
| 195 | F32Pinl  | 918          | left lateral pinna        | left outer ear         | Skin         | F3              | 6/18/08 | swab w/ sterile saline     | whole-body | none      |
| 196 | F32Pinr  | 848          | right lateral pinna       | right outer ear        | Skin         | F3              | 6/18/08 | swab w/ sterile saline     | whole-body | none      |
| 197 | F32Plml  | 1695         | left palm                 | left palm              | Skin         | F3              | 6/18/08 | swab w/ sterile saline     | whole-body | none      |
| 198 | F32Plmr  | 1142         | right palm                | right palm             | Skin         | F3              | 6/18/08 | swab w/ sterile saline     | whole-body | none      |
| 199 | F32Tong  | 1869         | dorsal surface of tongue  | tongue                 | Oral cavity  | F3              | 6/18/08 | swab                       | whole-body | none      |
| 200 | F33Ewax  | 860          | external auditory canal   | outer ear canal/earwax | EAC          | F3              | 9/17/08 | swab                       | whole-body | none      |
| 201 | F33Fcsw  | 1706         | stool                     | stool                  | Gut          | F3              | 9/17/08 | swab off used toilet paper | whole-body | none      |
| 202 | F33Fotl  | 1322         | left plantar foot         | left sole of foot      | Skin         | F3              | 9/17/08 | swab w/ sterile saline     | whole-body | none      |
| 203 | F33Fotr  | 1303         | right plantar foot        | right sole of foot     | Skin         | F3              | 9/17/08 | swab w/ sterile saline     | whole-body | none      |
| 204 | F33Frhd  | 1008         | forehead                  | forehead               | Skin         | F3              | 9/17/08 | swab w/ sterile saline     | whole-body | none      |
| 205 | F33Knee  | 1036         | popliteal fossae          | back of knees          | Skin         | F3              | 9/17/08 | swab w/ sterile saline     | whole-body | none      |
| 206 | F33Nost  | 985          | nares                     | nostrils               | Nostril      | F3              | 9/17/08 | swab w/ sterile saline     | whole-body | none      |
| 207 | F33Plml  | 1159         | left palm                 | left palm              | Skin         | F3              | 9/17/08 | swab w/ sterile saline     | whole-body | none      |
| 208 | F33Plmr  | 1406         | right palm                | right palm             | Skin         | F3              | 9/17/08 | swab w/ sterile saline     | whole-body | none      |
| 209 | F33Tong  | 2236         | dorsal surface of tongue  | tongue                 | Oral cavity  | F3              | 9/17/08 | swab                       | whole-body | none      |
| 210 | F34Ewax  | 768          | external auditory canal   | outer ear canal/earwax | EAC          | F3              | 9/18/08 | swab                       | whole-body | none      |
| 211 | F34Fcsw  | 1917         | stool                     | stool                  | Gut          | F3              | 9/18/08 | swab off used toilet paper | whole-body | none      |
| 212 | F34Fotl  | 1501         | left plantar foot         | left sole of foot      | Skin         | F3              | 9/18/08 | swab w/ sterile saline     | whole-body | none      |
| 213 | F34Fotr  | 1200         | right plantar foot        | right sole of foot     | Skin         | F3              | 9/18/08 | swab w/ sterile saline     | whole-body | none      |
| 214 | F34Frhd  | 1133         | forehead                  | forehead               | Skin         | F3              | 9/18/08 | swab w/ sterile saline     | whole-body | none      |
| 215 | F34Knee  | 945          | popliteal fossae          | back of knees          | Skin         | F3              | 9/18/08 | swab w/ sterile saline     | whole-body | none      |
| 216 | F34Nost  | 1152         | nares                     | nostrils               | Nostril      | F3              | 9/18/08 | swab w/ sterile saline     | whole-body | none      |

**Table S1.** Sample information

| #   | SampleID | No. of reads | Sample site (anatomical)      | Sample site (common)         | Body habitat | Host sex, indiv | Day     | Sample method              | Study      | Treatment |
|-----|----------|--------------|-------------------------------|------------------------------|--------------|-----------------|---------|----------------------------|------------|-----------|
| 217 | F34Plml  | 945          | left palm                     | left palm                    | Skin         | F3              | 9/18/08 | swab w/ sterile saline     | whole-body | none      |
| 218 | F34Plmr  | 1055         | right palm                    | right palm                   | Skin         | F3              | 9/18/08 | swab w/ sterile saline     | whole-body | none      |
| 219 | F34Tong  | 1864         | dorsal surface of tongue      | tongue                       | Oral cavity  | F3              | 9/18/08 | swab                       | whole-body | none      |
| 220 | M11Aptl  | 822          | left axilla                   | left armpit                  | Skin         | M1              | 6/17/08 | swab w/ sterile saline     | whole-body | none      |
| 221 | M11Apr   | 755          | right axilla                  | right armpit                 | Skin         | M1              | 6/17/08 | swab w/ sterile saline     | whole-body | none      |
| 222 | M11Ewxl  | 1247         | left external auditory canal  | left outer ear canal/earwax  | EAC          | M1              | 6/17/08 | swab                       | whole-body | none      |
| 223 | M11Fcsp  | 1398         | stool                         | stool                        | Gut          | M1              | 6/17/08 | swab stabbed into stool    | whole-body | none      |
| 224 | M11Fcsw  | 899          | stool                         | stool                        | Gut          | M1              | 6/17/08 | swab off used toilet paper | whole-body | none      |
| 225 | M11Forl  | 847          | left volar forearm            | left forearm                 | Skin         | M1              | 6/17/08 | swab w/ sterile saline     | whole-body | none      |
| 226 | M11Forr  | 566          | right volar forearm           | right forearm                | Skin         | M1              | 6/17/08 | swab w/ sterile saline     | whole-body | none      |
| 227 | M11Fotl  | 1119         | left plantar foot             | left sole of foot            | Skin         | M1              | 6/17/08 | swab w/ sterile saline     | whole-body | none      |
| 228 | M11Fotr  | 1000         | right plantar foot            | right sole of foot           | Skin         | M1              | 6/17/08 | swab w/ sterile saline     | whole-body | none      |
| 229 | M11Frhd  | 797          | forehead                      | forehead                     | Skin         | M1              | 6/17/08 | swab w/ sterile saline     | whole-body | none      |
| 230 | M11Glms  | 1045         | glans penis                   | glans penis                  | Skin         | M1              | 6/17/08 | swab w/ sterile saline     | whole-body | none      |
| 231 | M11Hair  | 910          | hair on head                  | hair on head                 | Hair         | M1              | 6/17/08 | swab w/ sterile saline     | whole-body | none      |
| 232 | M11Indl  | 805          | left palmar index finger      | left index finger            | Skin         | M1              | 6/17/08 | swab w/ sterile saline     | whole-body | none      |
| 233 | M11Indr  | 607          | right palmar index finger     | right index finger           | Skin         | M1              | 6/17/08 | swab w/ sterile saline     | whole-body | none      |
| 234 | M11Knel  | 864          | left popliteal fossa          | left back of knees           | Skin         | M1              | 6/17/08 | swab w/ sterile saline     | whole-body | none      |
| 235 | M11Kner  | 950          | right popliteal fossa         | right back of knees          | Skin         | M1              | 6/17/08 | swab w/ sterile saline     | whole-body | none      |
| 236 | M11Mout  | 1007         | oral cavity                   | mouth                        | Oral cavity  | M1              | 6/17/08 | rinse w/ sterile water     | whole-body | none      |
| 237 | M11Navl  | 661          | umbilicus                     | navel                        | Skin         | M1              | 6/17/08 | swab w/ sterile saline     | whole-body | none      |
| 238 | M11Nose  | 799          | external nose                 | external nose                | Skin         | M1              | 6/17/08 | swab w/ sterile saline     | whole-body | none      |
| 239 | M11Nstl  | 820          | left naris                    | left nostril                 | Nostril      | M1              | 6/17/08 | swab w/ sterile saline     | whole-body | none      |
| 240 | M11Nstr  | 604          | right naris                   | right nostril                | Nostril      | M1              | 6/17/08 | swab w/ sterile saline     | whole-body | none      |
| 241 | M11Pinl  | 784          | left lateral pinna            | left outer ear               | Skin         | M1              | 6/17/08 | swab w/ sterile saline     | whole-body | none      |
| 242 | M11Pinr  | 819          | right lateral pinna           | right outer ear              | Skin         | M1              | 6/17/08 | swab w/ sterile saline     | whole-body | none      |
| 243 | M11Plml  | 813          | left palm                     | left palm                    | Skin         | M1              | 6/17/08 | swab w/ sterile saline     | whole-body | none      |
| 244 | M11Plmr  | 700          | right palm                    | right palm                   | Skin         | M1              | 6/17/08 | swab w/ sterile saline     | whole-body | none      |
| 245 | M11Tong  | 1282         | dorsal surface of tongue      | tongue                       | Oral cavity  | M1              | 6/17/08 | swab                       | whole-body | none      |
| 246 | M12Aptl  | 1116         | left axilla                   | left armpit                  | Skin         | M1              | 6/18/08 | swab w/ sterile saline     | whole-body | none      |
| 247 | M12Apr   | 923          | right axilla                  | right armpit                 | Skin         | M1              | 6/18/08 | swab w/ sterile saline     | whole-body | none      |
| 248 | M12Ewxl  | 717          | left external auditory canal  | left outer ear canal/earwax  | EAC          | M1              | 6/18/08 | swab                       | whole-body | none      |
| 249 | M12Ewxr  | 1058         | right external auditory canal | right outer ear canal/earwax | EAC          | M1              | 6/18/08 | swab                       | whole-body | none      |
| 250 | M12Fcsp  | 877          | stool                         | stool                        | Gut          | M1              | 6/18/08 | swab stabbed into stool    | whole-body | none      |
| 251 | M12Fcsw  | 746          | stool                         | stool                        | Gut          | M1              | 6/18/08 | swab off used toilet paper | whole-body | none      |
| 252 | M12Forl  | 855          | left volar forearm            | left forearm                 | Skin         | M1              | 6/18/08 | swab w/ sterile saline     | whole-body | none      |

**Table S1.** Sample information

| #   | SampleID | No. of reads | Sample site (anatomical)  | Sample site (common)   | Body habitat | Host sex, indiv | Day     | Sample method              | Study      | Treatment |
|-----|----------|--------------|---------------------------|------------------------|--------------|-----------------|---------|----------------------------|------------|-----------|
| 253 | M12Forr  | 912          | right volar forearm       | right forearm          | Skin         | M1              | 6/18/08 | swab w/ sterile saline     | whole-body | none      |
| 254 | M12Fotl  | 1167         | left plantar foot         | left sole of foot      | Skin         | M1              | 6/18/08 | swab w/ sterile saline     | whole-body | none      |
| 255 | M12Fotr  | 820          | right plantar foot        | right sole of foot     | Skin         | M1              | 6/18/08 | swab w/ sterile saline     | whole-body | none      |
| 256 | M12Frhd  | 1066         | forehead                  | forehead               | Skin         | M1              | 6/18/08 | swab w/ sterile saline     | whole-body | none      |
| 257 | M12Glns  | 965          | glans penis               | glans penis            | Skin         | M1              | 6/18/08 | swab w/ sterile saline     | whole-body | none      |
| 258 | M12Hair  | 827          | hair on head              | hair on head           | Hair         | M1              | 6/18/08 | swab w/ sterile saline     | whole-body | none      |
| 259 | M12Indl  | 765          | left palmar index finger  | left index finger      | Skin         | M1              | 6/18/08 | swab w/ sterile saline     | whole-body | none      |
| 260 | M12Indr  | 787          | right palmar index finger | right index finger     | Skin         | M1              | 6/18/08 | swab w/ sterile saline     | whole-body | none      |
| 261 | M12Knel  | 727          | left popliteal fossa      | left back of knees     | Skin         | M1              | 6/18/08 | swab w/ sterile saline     | whole-body | none      |
| 262 | M12Kner  | 580          | right popliteal fossa     | right back of knees    | Skin         | M1              | 6/18/08 | swab w/ sterile saline     | whole-body | none      |
| 263 | M12Mout  | 957          | oral cavity               | mouth                  | Oral cavity  | M1              | 6/18/08 | rinse w/ sterile water     | whole-body | none      |
| 264 | M12Navl  | 865          | umbilicus                 | navel                  | Skin         | M1              | 6/18/08 | swab w/ sterile saline     | whole-body | none      |
| 265 | M12Nose  | 1118         | external nose             | external nose          | Skin         | M1              | 6/18/08 | swab w/ sterile saline     | whole-body | none      |
| 266 | M12Nstl  | 930          | left naris                | left nostril           | Nostril      | M1              | 6/18/08 | swab w/ sterile saline     | whole-body | none      |
| 267 | M12Nstr  | 1086         | right naris               | right nostril          | Nostril      | M1              | 6/18/08 | swab w/ sterile saline     | whole-body | none      |
| 268 | M12Pinl  | 842          | left lateral pinna        | left outer ear         | Skin         | M1              | 6/18/08 | swab w/ sterile saline     | whole-body | none      |
| 269 | M12Pinr  | 989          | right lateral pinna       | right outer ear        | Skin         | M1              | 6/18/08 | swab w/ sterile saline     | whole-body | none      |
| 270 | M12Plml  | 855          | left palm                 | left palm              | Skin         | M1              | 6/18/08 | swab w/ sterile saline     | whole-body | none      |
| 271 | M12Plmr  | 951          | right palm                | right palm             | Skin         | M1              | 6/18/08 | swab w/ sterile saline     | whole-body | none      |
| 272 | M12Tong  | 1301         | dorsal surface of tongue  | tongue                 | Oral cavity  | M1              | 6/18/08 | swab                       | whole-body | none      |
| 273 | M13Ewax  | 1192         | external auditory canal   | outer ear canal/earwax | EAC          | M1              | 9/17/08 | swab                       | whole-body | none      |
| 274 | M13Fcsw  | 1773         | stool                     | stool                  | Gut          | M1              | 9/17/08 | swab off used toilet paper | whole-body | none      |
| 275 | M13Fotl  | 830          | left plantar foot         | left sole of foot      | Skin         | M1              | 9/17/08 | swab w/ sterile saline     | whole-body | none      |
| 276 | M13Fotr  | 953          | right plantar foot        | right sole of foot     | Skin         | M1              | 9/17/08 | swab w/ sterile saline     | whole-body | none      |
| 277 | M13Frhd  | 1607         | forehead                  | forehead               | Skin         | M1              | 9/17/08 | swab w/ sterile saline     | whole-body | none      |
| 278 | M13Knee  | 1191         | popliteal fossae          | back of knees          | Skin         | M1              | 9/17/08 | swab w/ sterile saline     | whole-body | none      |
| 279 | M13Nost  | 1389         | nares                     | nostrils               | Nostril      | M1              | 9/17/08 | swab w/ sterile saline     | whole-body | none      |
| 280 | M13Plml  | 1266         | left palm                 | left palm              | Skin         | M1              | 9/17/08 | swab w/ sterile saline     | whole-body | none      |
| 281 | M13Plmr  | 997          | right palm                | right palm             | Skin         | M1              | 9/17/08 | swab w/ sterile saline     | whole-body | none      |
| 282 | M13Tong  | 1975         | dorsal surface of tongue  | tongue                 | Oral cavity  | M1              | 9/17/08 | swab                       | whole-body | none      |
| 283 | M14Ewax  | 1811         | external auditory canal   | outer ear canal/earwax | EAC          | M1              | 9/18/08 | swab                       | whole-body | none      |
| 284 | M14Fcsw  | 1640         | stool                     | stool                  | Gut          | M1              | 9/18/08 | swab off used toilet paper | whole-body | none      |
| 285 | M14Fotl  | 1163         | left plantar foot         | left sole of foot      | Skin         | M1              | 9/18/08 | swab w/ sterile saline     | whole-body | none      |
| 286 | M14Fotr  | 1092         | right plantar foot        | right sole of foot     | Skin         | M1              | 9/18/08 | swab w/ sterile saline     | whole-body | none      |
| 287 | M14Frhd  | 1302         | forehead                  | forehead               | Skin         | M1              | 9/18/08 | swab w/ sterile saline     | whole-body | none      |
| 288 | M14Knee  | 1283         | popliteal fossae          | back of knees          | Skin         | M1              | 9/18/08 | swab w/ sterile saline     | whole-body | none      |

**Table S1.** Sample information

| #   | SampleID | No. of reads | Sample site (anatomical)      | Sample site (common)         | Body habitat | Host sex, indiv | Day     | Sample method              | Study      | Treatment |
|-----|----------|--------------|-------------------------------|------------------------------|--------------|-----------------|---------|----------------------------|------------|-----------|
| 289 | M14Nost  | 1156         | nares                         | nostrils                     | Nostril      | M1              | 9/18/08 | swab w/ sterile saline     | whole-body | none      |
| 290 | M14Plml  | 1723         | left palm                     | left palm                    | Skin         | M1              | 9/18/08 | swab w/ sterile saline     | whole-body | none      |
| 291 | M14Plmr  | 1052         | right palm                    | right palm                   | Skin         | M1              | 9/18/08 | swab w/ sterile saline     | whole-body | none      |
| 292 | M14Tong  | 2490         | dorsal surface of tongue      | tongue                       | Oral cavity  | M1              | 9/18/08 | swab                       | whole-body | none      |
| 293 | M21Aptl  | 721          | left axilla                   | left armpit                  | Skin         | M2              | 6/17/08 | swab w/ sterile saline     | whole-body | none      |
| 294 | M21Apr   | 1346         | right axilla                  | right armpit                 | Skin         | M2              | 6/17/08 | swab w/ sterile saline     | whole-body | none      |
| 295 | M21Ewxl  | 1802         | left external auditory canal  | left outer ear canal/earwax  | EAC          | M2              | 6/17/08 | swab                       | whole-body | none      |
| 296 | M21Ewxr  | 1985         | right external auditory canal | right outer ear canal/earwax | EAC          | M2              | 6/17/08 | swab                       | whole-body | none      |
| 297 | M21Fcsp  | 2087         | stool                         | stool                        | Gut          | M2              | 6/17/08 | swab stabbed into stool    | whole-body | none      |
| 298 | M21Fcsw  | 1683         | stool                         | stool                        | Gut          | M2              | 6/17/08 | swab off used toilet paper | whole-body | none      |
| 299 | M21Forl  | 1701         | left volar forearm            | left forearm                 | Skin         | M2              | 6/17/08 | swab w/ sterile saline     | whole-body | none      |
| 300 | M21Forr  | 1139         | right volar forearm           | right forearm                | Skin         | M2              | 6/17/08 | swab w/ sterile saline     | whole-body | none      |
| 301 | M21Fotl  | 2889         | left plantar foot             | left sole of foot            | Skin         | M2              | 6/17/08 | swab w/ sterile saline     | whole-body | none      |
| 302 | M21Fotr  | 1185         | right plantar foot            | right sole of foot           | Skin         | M2              | 6/17/08 | swab w/ sterile saline     | whole-body | none      |
| 303 | M21Frhd  | 1697         | forehead                      | forehead                     | Skin         | M2              | 6/17/08 | swab w/ sterile saline     | whole-body | none      |
| 304 | M21Glms  | 1724         | glans penis                   | glans penis                  | Skin         | M2              | 6/17/08 | swab w/ sterile saline     | whole-body | none      |
| 305 | M21Hair  | 996          | hair on head                  | hair on head                 | Hair         | M2              | 6/17/08 | swab w/ sterile saline     | whole-body | none      |
| 306 | M21Indl  | 2061         | left palmar index finger      | left index finger            | Skin         | M2              | 6/17/08 | swab w/ sterile saline     | whole-body | none      |
| 307 | M21Indr  | 1919         | right palmar index finger     | right index finger           | Skin         | M2              | 6/17/08 | swab w/ sterile saline     | whole-body | none      |
| 308 | M21Knel  | 1452         | left popliteal fossa          | left back of knees           | Skin         | M2              | 6/17/08 | swab w/ sterile saline     | whole-body | none      |
| 309 | M21Kner  | 774          | right popliteal fossa         | right back of knees          | Skin         | M2              | 6/17/08 | swab w/ sterile saline     | whole-body | none      |
| 310 | M21Mout  | 5563         | oral cavity                   | mouth                        | Oral cavity  | M2              | 6/17/08 | rinse w/ sterile water     | whole-body | none      |
| 311 | M21Navl  | 1210         | umbilicus                     | navel                        | Skin         | M2              | 6/17/08 | swab w/ sterile saline     | whole-body | none      |
| 312 | M21Nose  | 651          | external nose                 | external nose                | Skin         | M2              | 6/17/08 | swab w/ sterile saline     | whole-body | none      |
| 313 | M21Nstl  | 1889         | left naris                    | left nostril                 | Nostril      | M2              | 6/17/08 | swab w/ sterile saline     | whole-body | none      |
| 314 | M21Nstr  | 1309         | right naris                   | right nostril                | Nostril      | M2              | 6/17/08 | swab w/ sterile saline     | whole-body | none      |
| 315 | M21Pinl  | 1808         | left lateral pinna            | left outer ear               | Skin         | M2              | 6/17/08 | swab w/ sterile saline     | whole-body | none      |
| 316 | M21Pinr  | 3063         | right lateral pinna           | right outer ear              | Skin         | M2              | 6/17/08 | swab w/ sterile saline     | whole-body | none      |
| 317 | M21Plml  | 2453         | left palm                     | left palm                    | Skin         | M2              | 6/17/08 | swab w/ sterile saline     | whole-body | none      |
| 318 | M21Plmr  | 2097         | right palm                    | right palm                   | Skin         | M2              | 6/17/08 | swab w/ sterile saline     | whole-body | none      |
| 319 | M21Tong  | 2481         | dorsal surface of tongue      | tongue                       | Oral cavity  | M2              | 6/17/08 | swab                       | whole-body | none      |
| 320 | M22Aptl  | 478          | left axilla                   | left armpit                  | Skin         | M2              | 6/18/08 | swab w/ sterile saline     | whole-body | none      |
| 321 | M22Apr   | 1644         | right axilla                  | right armpit                 | Skin         | M2              | 6/18/08 | swab w/ sterile saline     | whole-body | none      |
| 322 | M22Ewxl  | 1482         | left external auditory canal  | left outer ear canal/earwax  | EAC          | M2              | 6/18/08 | swab                       | whole-body | none      |
| 323 | M22Ewxr  | 1628         | right external auditory canal | right outer ear canal/earwax | EAC          | M2              | 6/18/08 | swab                       | whole-body | none      |
| 324 | M22Fcsp  | 1700         | stool                         | stool                        | Gut          | M2              | 6/18/08 | swab stabbed into stool    | whole-body | none      |



**Table S1.** Sample information

| #   | SampleID | No. of reads | Sample site (anatomical)  | Sample site (common)   | Body habitat | Host sex, indiv | Day     | Sample method              | Study      | Treatment |
|-----|----------|--------------|---------------------------|------------------------|--------------|-----------------|---------|----------------------------|------------|-----------|
| 325 | M22Fcsw  | 1512         | stool                     | stool                  | Gut          | M2              | 6/18/08 | swab off used toilet paper | whole-body | none      |
| 326 | M22Forl  | 1070         | left volar forearm        | left forearm           | Skin         | M2              | 6/18/08 | swab w/ sterile saline     | whole-body | none      |
| 327 | M22Forr  | 1103         | right volar forearm       | right forearm          | Skin         | M2              | 6/18/08 | swab w/ sterile saline     | whole-body | none      |
| 328 | M22Fotl  | 1497         | left plantar foot         | left sole of foot      | Skin         | M2              | 6/18/08 | swab w/ sterile saline     | whole-body | none      |
| 329 | M22Fotr  | 1773         | right plantar foot        | right sole of foot     | Skin         | M2              | 6/18/08 | swab w/ sterile saline     | whole-body | none      |
| 330 | M22Frhd  | 1170         | forehead                  | forehead               | Skin         | M2              | 6/18/08 | swab w/ sterile saline     | whole-body | none      |
| 331 | M22Glns  | 890          | glans penis               | glans penis            | Skin         | M2              | 6/18/08 | swab w/ sterile saline     | whole-body | none      |
| 332 | M22Hair  | 1294         | hair on head              | hair on head           | Hair         | M2              | 6/18/08 | swab w/ sterile saline     | whole-body | none      |
| 333 | M22lndl  | 1559         | left palmar index finger  | left index finger      | Skin         | M2              | 6/18/08 | swab w/ sterile saline     | whole-body | none      |
| 334 | M22lndr  | 1463         | right palmar index finger | right index finger     | Skin         | M2              | 6/18/08 | swab w/ sterile saline     | whole-body | none      |
| 335 | M22Knel  | 429          | left popliteal fossa      | left back of knees     | Skin         | M2              | 6/18/08 | swab w/ sterile saline     | whole-body | none      |
| 336 | M22Kner  | 533          | right popliteal fossa     | right back of knees    | Skin         | M2              | 6/18/08 | swab w/ sterile saline     | whole-body | none      |
| 337 | M22Mout  | 3027         | oral cavity               | mouth                  | Oral cavity  | M2              | 6/18/08 | rinse w/ sterile water     | whole-body | none      |
| 338 | M22Navl  | 1136         | umbilicus                 | navel                  | Skin         | M2              | 6/18/08 | swab w/ sterile saline     | whole-body | none      |
| 339 | M22Nose  | 2897         | external nose             | external nose          | Skin         | M2              | 6/18/08 | swab w/ sterile saline     | whole-body | none      |
| 340 | M22Nstl  | 1405         | left naris                | left nostril           | Nostril      | M2              | 6/18/08 | swab w/ sterile saline     | whole-body | none      |
| 341 | M22Nstr  | 1059         | right naris               | right nostril          | Nostril      | M2              | 6/18/08 | swab w/ sterile saline     | whole-body | none      |
| 342 | M22Pinl  | 1697         | left lateral pinna        | left outer ear         | Skin         | M2              | 6/18/08 | swab w/ sterile saline     | whole-body | none      |
| 343 | M22Pinr  | 1297         | right lateral pinna       | right outer ear        | Skin         | M2              | 6/18/08 | swab w/ sterile saline     | whole-body | none      |
| 344 | M22Plml  | 1586         | left palm                 | left palm              | Skin         | M2              | 6/18/08 | swab w/ sterile saline     | whole-body | none      |
| 345 | M22Plmr  | 1155         | right palm                | right palm             | Skin         | M2              | 6/18/08 | swab w/ sterile saline     | whole-body | none      |
| 346 | M22Tong  | 1740         | dorsal surface of tongue  | tongue                 | Oral cavity  | M2              | 6/18/08 | swab                       | whole-body | none      |
| 347 | M23Ewax  | 1146         | external auditory canal   | outer ear canal/earwax | EAC          | M2              | 9/17/08 | swab                       | whole-body | none      |
| 348 | M23Fcsw  | 1796         | stool                     | stool                  | Gut          | M2              | 9/17/08 | swab off used toilet paper | whole-body | none      |
| 349 | M23Fotl  | 1022         | left plantar foot         | left sole of foot      | Skin         | M2              | 9/17/08 | swab w/ sterile saline     | whole-body | none      |
| 350 | M23Fotr  | 1158         | right plantar foot        | right sole of foot     | Skin         | M2              | 9/17/08 | swab w/ sterile saline     | whole-body | none      |
| 351 | M23Frhd  | 1737         | forehead                  | forehead               | Skin         | M2              | 9/17/08 | swab w/ sterile saline     | whole-body | none      |
| 352 | M23Knee  | 1495         | popliteal fossae          | back of knees          | Skin         | M2              | 9/17/08 | swab w/ sterile saline     | whole-body | none      |
| 353 | M23Nost  | 1298         | nares                     | nostrils               | Nostril      | M2              | 9/17/08 | swab w/ sterile saline     | whole-body | none      |
| 354 | M23Plml  | 1493         | left palm                 | left palm              | Skin         | M2              | 9/17/08 | swab w/ sterile saline     | whole-body | none      |
| 355 | M23Plmr  | 949          | right palm                | right palm             | Skin         | M2              | 9/17/08 | swab w/ sterile saline     | whole-body | none      |
| 356 | M23Tong  | 2069         | dorsal surface of tongue  | tongue                 | Oral cavity  | M2              | 9/17/08 | swab                       | whole-body | none      |
| 357 | M24Ewax  | 1207         | external auditory canal   | outer ear canal/earwax | EAC          | M2              | 9/18/08 | swab                       | whole-body | none      |
| 358 | M24Fcsw  | 1483         | stool                     | stool                  | Gut          | M2              | 9/18/08 | swab off used toilet paper | whole-body | none      |
| 359 | M24Fotl  | 1190         | left plantar foot         | left sole of foot      | Skin         | M2              | 9/18/08 | swab w/ sterile saline     | whole-body | none      |
| 360 | M24Fotr  | 861          | right plantar foot        | right sole of foot     | Skin         | M2              | 9/18/08 | swab w/ sterile saline     | whole-body | none      |

**Table S1.** Sample information

| #   | SampleID | No. of reads | Sample site (anatomical)      | Sample site (common)         | Body habitat | Host sex, indiv | Day     | Sample method              | Study      | Treatment |
|-----|----------|--------------|-------------------------------|------------------------------|--------------|-----------------|---------|----------------------------|------------|-----------|
| 361 | M24Frhd  | 1126         | forehead                      | forehead                     | Skin         | M2              | 9/18/08 | swab w/ sterile saline     | whole-body | none      |
| 362 | M24Knee  | 1161         | popliteal fossae              | back of knees                | Skin         | M2              | 9/18/08 | swab w/ sterile saline     | whole-body | none      |
| 363 | M24Nost  | 1511         | nares                         | nostrils                     | Nostril      | M2              | 9/18/08 | swab w/ sterile saline     | whole-body | none      |
| 364 | M24Plml  | 1014         | left palm                     | left palm                    | Skin         | M2              | 9/18/08 | swab w/ sterile saline     | whole-body | none      |
| 365 | M24Plmr  | 1023         | right palm                    | right palm                   | Skin         | M2              | 9/18/08 | swab w/ sterile saline     | whole-body | none      |
| 366 | M24Tong  | 714          | dorsal surface of tongue      | tongue                       | Oral cavity  | M2              | 9/18/08 | swab                       | whole-body | none      |
| 367 | M31Aptl  | 1641         | left axilla                   | left armpit                  | Skin         | M3              | 6/17/08 | swab w/ sterile saline     | whole-body | none      |
| 368 | M31Apr   | 1758         | right axilla                  | right armpit                 | Skin         | M3              | 6/17/08 | swab w/ sterile saline     | whole-body | none      |
| 369 | M31Ewxl  | 1272         | left external auditory canal  | left outer ear canal/earwax  | EAC          | M3              | 6/17/08 | swab                       | whole-body | none      |
| 370 | M31Ewxr  | 1739         | right external auditory canal | right outer ear canal/earwax | EAC          | M3              | 6/17/08 | swab                       | whole-body | none      |
| 371 | M31Fcsp  | 582          | stool                         | stool                        | Gut          | M3              | 6/17/08 | swab stabbed into stool    | whole-body | none      |
| 372 | M31Fcsw  | 1535         | stool                         | stool                        | Gut          | M3              | 6/17/08 | swab off used toilet paper | whole-body | none      |
| 373 | M31Forl  | 573          | left volar forearm            | left forearm                 | Skin         | M3              | 6/17/08 | swab w/ sterile saline     | whole-body | none      |
| 374 | M31Forr  | 518          | right volar forearm           | right forearm                | Skin         | M3              | 6/17/08 | swab w/ sterile saline     | whole-body | none      |
| 375 | M31Fotl  | 627          | left plantar foot             | left sole of foot            | Skin         | M3              | 6/17/08 | swab w/ sterile saline     | whole-body | none      |
| 376 | M31Fotr  | 1268         | right plantar foot            | right sole of foot           | Skin         | M3              | 6/17/08 | swab w/ sterile saline     | whole-body | none      |
| 377 | M31Frhd  | 1752         | forehead                      | forehead                     | Skin         | M3              | 6/17/08 | swab w/ sterile saline     | whole-body | none      |
| 378 | M31Glms  | 1157         | glans penis                   | glans penis                  | Skin         | M3              | 6/17/08 | swab w/ sterile saline     | whole-body | none      |
| 379 | M31Hair  | 1655         | hair on head                  | hair on head                 | Hair         | M3              | 6/17/08 | swab w/ sterile saline     | whole-body | none      |
| 380 | M31Indl  | 2120         | left palmar index finger      | left index finger            | Skin         | M3              | 6/17/08 | swab w/ sterile saline     | whole-body | none      |
| 381 | M31Indr  | 2220         | right palmar index finger     | right index finger           | Skin         | M3              | 6/17/08 | swab w/ sterile saline     | whole-body | none      |
| 382 | M31Knel  | 1120         | left popliteal fossa          | left back of knees           | Skin         | M3              | 6/17/08 | swab w/ sterile saline     | whole-body | none      |
| 383 | M31Kner  | 913          | right popliteal fossa         | right back of knees          | Skin         | M3              | 6/17/08 | swab w/ sterile saline     | whole-body | none      |
| 384 | M31Mout  | 1245         | oral cavity                   | mouth                        | Oral cavity  | M3              | 6/17/08 | rinse w/ sterile water     | whole-body | none      |
| 385 | M31Navl  | 585          | umbilicus                     | navel                        | Skin         | M3              | 6/17/08 | swab w/ sterile saline     | whole-body | none      |
| 386 | M31Nose  | 1626         | external nose                 | external nose                | Skin         | M3              | 6/17/08 | swab w/ sterile saline     | whole-body | none      |
| 387 | M31Nstl  | 785          | left naris                    | left nostril                 | Nostril      | M3              | 6/17/08 | swab w/ sterile saline     | whole-body | none      |
| 388 | M31Nstr  | 1139         | right naris                   | right nostril                | Nostril      | M3              | 6/17/08 | swab w/ sterile saline     | whole-body | none      |
| 389 | M31Pinl  | 1216         | left lateral pinna            | left outer ear               | Skin         | M3              | 6/17/08 | swab w/ sterile saline     | whole-body | none      |
| 390 | M31Pinr  | 1043         | right lateral pinna           | right outer ear              | Skin         | M3              | 6/17/08 | swab w/ sterile saline     | whole-body | none      |
| 391 | M31Plml  | 1209         | left palm                     | left palm                    | Skin         | M3              | 6/17/08 | swab w/ sterile saline     | whole-body | none      |
| 392 | M31Plmr  | 1722         | right palm                    | right palm                   | Skin         | M3              | 6/17/08 | swab w/ sterile saline     | whole-body | none      |
| 393 | M31Tong  | 1872         | dorsal surface of tongue      | tongue                       | Oral cavity  | M3              | 6/17/08 | swab                       | whole-body | none      |
| 394 | M32Aptl  | 1110         | left axilla                   | left armpit                  | Skin         | M3              | 6/18/08 | swab w/ sterile saline     | whole-body | none      |
| 395 | M32Apr   | 1859         | right axilla                  | right armpit                 | Skin         | M3              | 6/18/08 | swab w/ sterile saline     | whole-body | none      |
| 396 | M32Ewxl  | 1298         | left external auditory canal  | left outer ear canal/earwax  | EAC          | M3              | 6/18/08 | swab                       | whole-body | none      |

**Table S1.** Sample information

| #   | SampleID | No. of reads | Sample site (anatomical)      | Sample site (common)         | Body habitat | Host sex, indiv | Day     | Sample method              | Study      | Treatment |
|-----|----------|--------------|-------------------------------|------------------------------|--------------|-----------------|---------|----------------------------|------------|-----------|
| 397 | M32Ewxr  | 1222         | right external auditory canal | right outer ear canal/earwax | EAC          | M3              | 6/18/08 | swab                       | whole-body | none      |
| 398 | M32Fcsp  | 1396         | stool                         | stool                        | Gut          | M3              | 6/18/08 | swab stabbed into stool    | whole-body | none      |
| 399 | M32Fcsw  | 1489         | stool                         | stool                        | Gut          | M3              | 6/18/08 | swab off used toilet paper | whole-body | none      |
| 400 | M32Forl  | 1061         | left volar forearm            | left forearm                 | Skin         | M3              | 6/18/08 | swab w/ sterile saline     | whole-body | none      |
| 401 | M32Forr  | 1584         | right volar forearm           | right forearm                | Skin         | M3              | 6/18/08 | swab w/ sterile saline     | whole-body | none      |
| 402 | M32Fotl  | 873          | left plantar foot             | left sole of foot            | Skin         | M3              | 6/18/08 | swab w/ sterile saline     | whole-body | none      |
| 403 | M32Fotr  | 1227         | right plantar foot            | right sole of foot           | Skin         | M3              | 6/18/08 | swab w/ sterile saline     | whole-body | none      |
| 404 | M32Frhd  | 1247         | forehead                      | forehead                     | Skin         | M3              | 6/18/08 | swab w/ sterile saline     | whole-body | none      |
| 405 | M32Glms  | 790          | glans penis                   | glans penis                  | Skin         | M3              | 6/18/08 | swab w/ sterile saline     | whole-body | none      |
| 406 | M32Hair  | 1162         | hair on head                  | hair on head                 | Hair         | M3              | 6/18/08 | swab w/ sterile saline     | whole-body | none      |
| 407 | M32Indl  | 1811         | left palmar index finger      | left index finger            | Skin         | M3              | 6/18/08 | swab w/ sterile saline     | whole-body | none      |
| 408 | M32Indr  | 1086         | right palmar index finger     | right index finger           | Skin         | M3              | 6/18/08 | swab w/ sterile saline     | whole-body | none      |
| 409 | M32Knel  | 565          | left popliteal fossa          | left back of knees           | Skin         | M3              | 6/18/08 | swab w/ sterile saline     | whole-body | none      |
| 410 | M32Kner  | 601          | right popliteal fossa         | right back of knees          | Skin         | M3              | 6/18/08 | swab w/ sterile saline     | whole-body | none      |
| 411 | M32Mout  | 1645         | oral cavity                   | mouth                        | Oral cavity  | M3              | 6/18/08 | rinse w/ sterile water     | whole-body | none      |
| 412 | M32Nose  | 1633         | external nose                 | external nose                | Skin         | M3              | 6/18/08 | swab w/ sterile saline     | whole-body | none      |
| 413 | M32Nstl  | 1302         | left naris                    | left nostril                 | Nostril      | M3              | 6/18/08 | swab w/ sterile saline     | whole-body | none      |
| 414 | M32Nstr  | 1512         | right naris                   | right nostril                | Nostril      | M3              | 6/18/08 | swab w/ sterile saline     | whole-body | none      |
| 415 | M32Pinl  | 1328         | left lateral pinna            | left outer ear               | Skin         | M3              | 6/18/08 | swab w/ sterile saline     | whole-body | none      |
| 416 | M32Pinr  | 718          | right lateral pinna           | right outer ear              | Skin         | M3              | 6/18/08 | swab w/ sterile saline     | whole-body | none      |
| 417 | M32Plml  | 1447         | left palm                     | left palm                    | Skin         | M3              | 6/18/08 | swab w/ sterile saline     | whole-body | none      |
| 418 | M32Plmr  | 1279         | right palm                    | right palm                   | Skin         | M3              | 6/18/08 | swab w/ sterile saline     | whole-body | none      |
| 419 | M32Tong  | 2099         | dorsal surface of tongue      | tongue                       | Oral cavity  | M3              | 6/18/08 | swab                       | whole-body | none      |
| 420 | M33Ewax  | 1044         | external auditory canal       | outer ear canal/earwax       | EAC          | M3              | 9/17/08 | swab                       | whole-body | none      |
| 421 | M33Fcsw  | 1671         | stool                         | stool                        | Gut          | M3              | 9/17/08 | swab off used toilet paper | whole-body | none      |
| 422 | M33Fotl  | 852          | left plantar foot             | left sole of foot            | Skin         | M3              | 9/17/08 | swab w/ sterile saline     | whole-body | none      |
| 423 | M33Fotr  | 798          | right plantar foot            | right sole of foot           | Skin         | M3              | 9/17/08 | swab w/ sterile saline     | whole-body | none      |
| 424 | M33Frhd  | 989          | forehead                      | forehead                     | Skin         | M3              | 9/17/08 | swab w/ sterile saline     | whole-body | none      |
| 425 | M33Knee  | 932          | popliteal fossae              | back of knees                | Skin         | M3              | 9/17/08 | swab w/ sterile saline     | whole-body | none      |
| 426 | M33Nost  | 1041         | nares                         | nostrils                     | Nostril      | M3              | 9/17/08 | swab w/ sterile saline     | whole-body | none      |
| 427 | M33Plml  | 1027         | left palm                     | left palm                    | Skin         | M3              | 9/17/08 | swab w/ sterile saline     | whole-body | none      |
| 428 | M33Plmr  | 1013         | right palm                    | right palm                   | Skin         | M3              | 9/17/08 | swab w/ sterile saline     | whole-body | none      |
| 429 | M33Tong  | 1679         | dorsal surface of tongue      | tongue                       | Oral cavity  | M3              | 9/17/08 | swab                       | whole-body | none      |
| 430 | M34Ewax  | 1288         | external auditory canal       | outer ear canal/earwax       | EAC          | M3              | 9/18/08 | swab                       | whole-body | none      |
| 431 | M34Fotl  | 921          | left plantar foot             | left sole of foot            | Skin         | M3              | 9/18/08 | swab w/ sterile saline     | whole-body | none      |
| 432 | M34Fotr  | 960          | right plantar foot            | right sole of foot           | Skin         | M3              | 9/18/08 | swab w/ sterile saline     | whole-body | none      |

**Table S1.** Sample information

| #   | SampleID | No. of reads | Sample site (anatomical)      | Sample site (common)         | Body habitat | Host sex, indiv | Day     | Sample method              | Study      | Treatment |
|-----|----------|--------------|-------------------------------|------------------------------|--------------|-----------------|---------|----------------------------|------------|-----------|
| 433 | M34Frhd  | 1117         | forehead                      | forehead                     | Skin         | M3              | 9/18/08 | swab w/ sterile saline     | whole-body | none      |
| 434 | M34Knee  | 820          | popliteal fossae              | back of knees                | Skin         | M3              | 9/18/08 | swab w/ sterile saline     | whole-body | none      |
| 435 | M34Nost  | 1100         | nares                         | nostrils                     | Nostril      | M3              | 9/18/08 | swab w/ sterile saline     | whole-body | none      |
| 436 | M34Plml  | 1191         | left palm                     | left palm                    | Skin         | M3              | 9/18/08 | swab w/ sterile saline     | whole-body | none      |
| 437 | M34Plmr  | 1000         | right palm                    | right palm                   | Skin         | M3              | 9/18/08 | swab w/ sterile saline     | whole-body | none      |
| 438 | M34Tong  | 2920         | dorsal surface of tongue      | tongue                       | Oral cavity  | M3              | 9/18/08 | swab                       | whole-body | none      |
| 439 | M41Aptl  | 1840         | left axilla                   | left armpit                  | Skin         | M4              | 6/17/08 | swab w/ sterile saline     | whole-body | none      |
| 440 | M41Apr   | 1831         | right axilla                  | right armpit                 | Skin         | M4              | 6/17/08 | swab w/ sterile saline     | whole-body | none      |
| 441 | M41Ewxl  | 2562         | left external auditory canal  | left outer ear canal/earwax  | EAC          | M4              | 6/17/08 | swab                       | whole-body | none      |
| 442 | M41Ewxr  | 2781         | right external auditory canal | right outer ear canal/earwax | EAC          | M4              | 6/17/08 | swab                       | whole-body | none      |
| 443 | M41Fcsp  | 2086         | stool                         | stool                        | Gut          | M4              | 6/17/08 | swab stabbed into stool    | whole-body | none      |
| 444 | M41Fcsw  | 2012         | stool                         | stool                        | Gut          | M4              | 6/17/08 | swab off used toilet paper | whole-body | none      |
| 445 | M41Forl  | 700          | left volar forearm            | left forearm                 | Skin         | M4              | 6/17/08 | swab w/ sterile saline     | whole-body | none      |
| 446 | M41Forr  | 1099         | right volar forearm           | right forearm                | Skin         | M4              | 6/17/08 | swab w/ sterile saline     | whole-body | none      |
| 447 | M41Fotl  | 1971         | left plantar foot             | left sole of foot            | Skin         | M4              | 6/17/08 | swab w/ sterile saline     | whole-body | none      |
| 448 | M41Fotr  | 1345         | right plantar foot            | right sole of foot           | Skin         | M4              | 6/17/08 | swab w/ sterile saline     | whole-body | none      |
| 449 | M41Frhd  | 1380         | forehead                      | forehead                     | Skin         | M4              | 6/17/08 | swab w/ sterile saline     | whole-body | none      |
| 450 | M41Glms  | 505          | glans penis                   | glans penis                  | Skin         | M4              | 6/17/08 | swab w/ sterile saline     | whole-body | none      |
| 451 | M41Hair  | 893          | hair on head                  | hair on head                 | Hair         | M4              | 6/17/08 | swab w/ sterile saline     | whole-body | none      |
| 452 | M41Indl  | 843          | left palmar index finger      | left index finger            | Skin         | M4              | 6/17/08 | swab w/ sterile saline     | whole-body | none      |
| 453 | M41Indr  | 649          | right palmar index finger     | right index finger           | Skin         | M4              | 6/17/08 | swab w/ sterile saline     | whole-body | none      |
| 454 | M41Knel  | 1689         | left popliteal fossa          | left back of knees           | Skin         | M4              | 6/17/08 | swab w/ sterile saline     | whole-body | none      |
| 455 | M41Kner  | 1719         | right popliteal fossa         | right back of knees          | Skin         | M4              | 6/17/08 | swab w/ sterile saline     | whole-body | none      |
| 456 | M41Mout  | 1052         | oral cavity                   | mouth                        | Oral cavity  | M4              | 6/17/08 | rinse w/ sterile water     | whole-body | none      |
| 457 | M41Navl  | 1986         | umbilicus                     | navel                        | Skin         | M4              | 6/17/08 | swab w/ sterile saline     | whole-body | none      |
| 458 | M41Nose  | 1076         | external nose                 | external nose                | Skin         | M4              | 6/17/08 | swab w/ sterile saline     | whole-body | none      |
| 459 | M41Nstl  | 1543         | left naris                    | left nostril                 | Nostril      | M4              | 6/17/08 | swab w/ sterile saline     | whole-body | none      |
| 460 | M41Nstr  | 888          | right naris                   | right nostril                | Nostril      | M4              | 6/17/08 | swab w/ sterile saline     | whole-body | none      |
| 461 | M41Pinl  | 1210         | left lateral pinna            | left outer ear               | Skin         | M4              | 6/17/08 | swab w/ sterile saline     | whole-body | none      |
| 462 | M41Pinr  | 1159         | right lateral pinna           | right outer ear              | Skin         | M4              | 6/17/08 | swab w/ sterile saline     | whole-body | none      |
| 463 | M41Plml  | 1740         | left palm                     | left palm                    | Skin         | M4              | 6/17/08 | swab w/ sterile saline     | whole-body | none      |
| 464 | M41Plmr  | 1195         | right palm                    | right palm                   | Skin         | M4              | 6/17/08 | swab w/ sterile saline     | whole-body | none      |
| 465 | M41Tong  | 1855         | dorsal surface of tongue      | tongue                       | Oral cavity  | M4              | 6/17/08 | swab                       | whole-body | none      |
| 466 | M42Aptl  | 1392         | left axilla                   | left armpit                  | Skin         | M4              | 6/18/08 | swab w/ sterile saline     | whole-body | none      |
| 467 | M42Apr   | 1455         | right axilla                  | right armpit                 | Skin         | M4              | 6/18/08 | swab w/ sterile saline     | whole-body | none      |
| 468 | M42Ewxl  | 1828         | left external auditory canal  | left outer ear canal/earwax  | EAC          | M4              | 6/18/08 | swab                       | whole-body | none      |

**Table S1.** Sample information

| #   | SampleID | No. of reads | Sample site (anatomical)      | Sample site (common)         | Body habitat | Host sex, indiv | Day     | Sample method              | Study      | Treatment |
|-----|----------|--------------|-------------------------------|------------------------------|--------------|-----------------|---------|----------------------------|------------|-----------|
| 469 | M42Ewxr  | 1152         | right external auditory canal | right outer ear canal/earwax | EAC          | M4              | 6/18/08 | swab                       | whole-body | none      |
| 470 | M42Fcsp  | 595          | stool                         | stool                        | Gut          | M4              | 6/18/08 | swab stabbed into stool    | whole-body | none      |
| 471 | M42Fcsw  | 1863         | stool                         | stool                        | Gut          | M4              | 6/18/08 | swab off used toilet paper | whole-body | none      |
| 472 | M42Forl  | 1507         | left volar forearm            | left forearm                 | Skin         | M4              | 6/18/08 | swab w/ sterile saline     | whole-body | none      |
| 473 | M42Forr  | 828          | right volar forearm           | right forearm                | Skin         | M4              | 6/18/08 | swab w/ sterile saline     | whole-body | none      |
| 474 | M42Fotl  | 2199         | left plantar foot             | left sole of foot            | Skin         | M4              | 6/18/08 | swab w/ sterile saline     | whole-body | none      |
| 475 | M42Fotr  | 901          | right plantar foot            | right sole of foot           | Skin         | M4              | 6/18/08 | swab w/ sterile saline     | whole-body | none      |
| 476 | M42Frhd  | 1936         | forehead                      | forehead                     | Skin         | M4              | 6/18/08 | swab w/ sterile saline     | whole-body | none      |
| 477 | M42Glms  | 1299         | glans penis                   | glans penis                  | Skin         | M4              | 6/18/08 | swab w/ sterile saline     | whole-body | none      |
| 478 | M42Hair  | 2107         | hair on head                  | hair on head                 | Hair         | M4              | 6/18/08 | swab w/ sterile saline     | whole-body | none      |
| 479 | M42Indl  | 2138         | left palmar index finger      | left index finger            | Skin         | M4              | 6/18/08 | swab w/ sterile saline     | whole-body | none      |
| 480 | M42Indr  | 1998         | right palmar index finger     | right index finger           | Skin         | M4              | 6/18/08 | swab w/ sterile saline     | whole-body | none      |
| 481 | M42Knel  | 1786         | left popliteal fossa          | left back of knees           | Skin         | M4              | 6/18/08 | swab w/ sterile saline     | whole-body | none      |
| 482 | M42Kner  | 1041         | right popliteal fossa         | right back of knees          | Skin         | M4              | 6/18/08 | swab w/ sterile saline     | whole-body | none      |
| 483 | M42Mout  | 2484         | oral cavity                   | mouth                        | Oral cavity  | M4              | 6/18/08 | rinse w/ sterile water     | whole-body | none      |
| 484 | M42Navl  | 570          | umbilicus                     | navel                        | Skin         | M4              | 6/18/08 | swab w/ sterile saline     | whole-body | none      |
| 485 | M42Nose  | 1029         | external nose                 | external nose                | Skin         | M4              | 6/18/08 | swab w/ sterile saline     | whole-body | none      |
| 486 | M42Nstl  | 894          | left naris                    | left nostril                 | Nostril      | M4              | 6/18/08 | swab w/ sterile saline     | whole-body | none      |
| 487 | M42Nstr  | 686          | right naris                   | right nostril                | Nostril      | M4              | 6/18/08 | swab w/ sterile saline     | whole-body | none      |
| 488 | M42Pinl  | 2109         | left lateral pinna            | left outer ear               | Skin         | M4              | 6/18/08 | swab w/ sterile saline     | whole-body | none      |
| 489 | M42Pivr  | 1444         | right lateral pinna           | right outer ear              | Skin         | M4              | 6/18/08 | swab w/ sterile saline     | whole-body | none      |
| 490 | M42Plml  | 1376         | left palm                     | left palm                    | Skin         | M4              | 6/18/08 | swab w/ sterile saline     | whole-body | none      |
| 491 | M42Plmr  | 1185         | right palm                    | right palm                   | Skin         | M4              | 6/18/08 | swab w/ sterile saline     | whole-body | none      |
| 492 | M42Tong  | 1498         | dorsal surface of tongue      | tongue                       | Oral cavity  | M4              | 6/18/08 | swab                       | whole-body | none      |
| 493 | M43Ewax  | 1790         | external auditory canal       | outer ear canal/earwax       | EAC          | M4              | 9/17/08 | swab                       | whole-body | none      |
| 494 | M43Fcsw  | 1629         | stool                         | stool                        | Gut          | M4              | 9/17/08 | swab off used toilet paper | whole-body | none      |
| 495 | M43Fotl  | 1100         | left plantar foot             | left sole of foot            | Skin         | M4              | 9/17/08 | swab w/ sterile saline     | whole-body | none      |
| 496 | M43Fotr  | 1050         | right plantar foot            | right sole of foot           | Skin         | M4              | 9/17/08 | swab w/ sterile saline     | whole-body | none      |
| 497 | M43Frhd  | 1411         | forehead                      | forehead                     | Skin         | M4              | 9/17/08 | swab w/ sterile saline     | whole-body | none      |
| 498 | M43Knee  | 1094         | popliteal fossae              | back of knees                | Skin         | M4              | 9/17/08 | swab w/ sterile saline     | whole-body | none      |
| 499 | M43Nost  | 1314         | nares                         | nostrils                     | Nostril      | M4              | 9/17/08 | swab w/ sterile saline     | whole-body | none      |
| 500 | M43Plml  | 1375         | left palm                     | left palm                    | Skin         | M4              | 9/17/08 | swab w/ sterile saline     | whole-body | none      |
| 501 | M43Plmr  | 1239         | right palm                    | right palm                   | Skin         | M4              | 9/17/08 | swab w/ sterile saline     | whole-body | none      |
| 502 | M43Tong  | 1634         | dorsal surface of tongue      | tongue                       | Oral cavity  | M4              | 9/17/08 | swab                       | whole-body | none      |
| 503 | M44Ewax  | 1584         | external auditory canal       | outer ear canal/earwax       | EAC          | M4              | 9/18/08 | swab                       | whole-body | none      |
| 504 | M44Fcsw  | 1848         | stool                         | stool                        | Gut          | M4              | 9/18/08 | swab off used toilet paper | whole-body | none      |

**Table S1.** Sample information

| #   | SampleID | No. of reads | Sample site (anatomical) | Sample site (common)   | Body habitat | Host sex, indiv | Day     | Sample method              | Study      | Treatment |
|-----|----------|--------------|--------------------------|------------------------|--------------|-----------------|---------|----------------------------|------------|-----------|
| 505 | M44Fotl  | 1023         | left plantar foot        | left sole of foot      | Skin         | M4              | 9/18/08 | swab w/ sterile saline     | whole-body | none      |
| 506 | M44Fotr  | 979          | right plantar foot       | right sole of foot     | Skin         | M4              | 9/18/08 | swab w/ sterile saline     | whole-body | none      |
| 507 | M44Frhd  | 1237         | forehead                 | forehead               | Skin         | M4              | 9/18/08 | swab w/ sterile saline     | whole-body | none      |
| 508 | M44Knee  | 1259         | popliteal fossae         | back of knees          | Skin         | M4              | 9/18/08 | swab w/ sterile saline     | whole-body | none      |
| 509 | M44Nost  | 1173         | nares                    | nostrils               | Nostril      | M4              | 9/18/08 | swab w/ sterile saline     | whole-body | none      |
| 510 | M44Plml  | 1398         | left palm                | left palm              | Skin         | M4              | 9/18/08 | swab w/ sterile saline     | whole-body | none      |
| 511 | M44Plmr  | 1324         | right palm               | right palm             | Skin         | M4              | 9/18/08 | swab w/ sterile saline     | whole-body | none      |
| 512 | M44Tong  | 1842         | dorsal surface of tongue | tongue                 | Oral cavity  | M4              | 9/18/08 | swab                       | whole-body | none      |
| 513 | M53Ewax  | 1099         | external auditory canal  | outer ear canal/earwax | EAC          | M5              | 9/17/08 | swab                       | whole-body | none      |
| 514 | M53Fcsw  | 1488         | stool                    | stool                  | Gut          | M5              | 9/17/08 | swab off used toilet paper | whole-body | none      |
| 515 | M53Fotl  | 1287         | left plantar foot        | left sole of foot      | Skin         | M5              | 9/17/08 | swab w/ sterile saline     | whole-body | none      |
| 516 | M53Fotr  | 1251         | right plantar foot       | right sole of foot     | Skin         | M5              | 9/17/08 | swab w/ sterile saline     | whole-body | none      |
| 517 | M53Frhd  | 1154         | forehead                 | forehead               | Skin         | M5              | 9/17/08 | swab w/ sterile saline     | whole-body | none      |
| 518 | M53Knee  | 1348         | popliteal fossae         | back of knees          | Skin         | M5              | 9/17/08 | swab w/ sterile saline     | whole-body | none      |
| 519 | M53Nost  | 1656         | nares                    | nostrils               | Nostril      | M5              | 9/17/08 | swab w/ sterile saline     | whole-body | none      |
| 520 | M53Plml  | 1229         | left palm                | left palm              | Skin         | M5              | 9/17/08 | swab w/ sterile saline     | whole-body | none      |
| 521 | M53Plmr  | 992          | right palm               | right palm             | Skin         | M5              | 9/17/08 | swab w/ sterile saline     | whole-body | none      |
| 522 | M53Tong  | 1967         | dorsal surface of tongue | tongue                 | Oral cavity  | M5              | 9/17/08 | swab                       | whole-body | none      |
| 523 | M54Ewax  | 1014         | external auditory canal  | outer ear canal/earwax | EAC          | M5              | 9/18/08 | swab                       | whole-body | none      |
| 524 | M54Fcsw  | 1588         | stool                    | stool                  | Gut          | M5              | 9/18/08 | swab off used toilet paper | whole-body | none      |
| 525 | M54Fotl  | 1068         | left plantar foot        | left sole of foot      | Skin         | M5              | 9/18/08 | swab w/ sterile saline     | whole-body | none      |
| 526 | M54Fotr  | 1296         | right plantar foot       | right sole of foot     | Skin         | M5              | 9/18/08 | swab w/ sterile saline     | whole-body | none      |
| 527 | M54Frhd  | 1201         | forehead                 | forehead               | Skin         | M5              | 9/18/08 | swab w/ sterile saline     | whole-body | none      |
| 528 | M54Knee  | 1211         | popliteal fossae         | back of knees          | Skin         | M5              | 9/18/08 | swab w/ sterile saline     | whole-body | none      |
| 529 | M54Nost  | 1157         | nares                    | nostrils               | Nostril      | M5              | 9/18/08 | swab w/ sterile saline     | whole-body | none      |
| 530 | M54Plml  | 1181         | left palm                | left palm              | Skin         | M5              | 9/18/08 | swab w/ sterile saline     | whole-body | none      |
| 531 | M54Plmr  | 1253         | right palm               | right palm             | Skin         | M5              | 9/18/08 | swab w/ sterile saline     | whole-body | none      |
| 532 | M54Tong  | 1954         | dorsal surface of tongue | tongue                 | Oral cavity  | M5              | 9/18/08 | swab                       | whole-body | none      |
| 533 | M63Ewax  | 1094         | external auditory canal  | outer ear canal/earwax | EAC          | M6              | 9/17/08 | swab                       | whole-body | none      |
| 534 | M63Fcsw  | 1581         | stool                    | stool                  | Gut          | M6              | 9/17/08 | swab off used toilet paper | whole-body | none      |
| 535 | M63Fotl  | 1030         | left plantar foot        | left sole of foot      | Skin         | M6              | 9/17/08 | swab w/ sterile saline     | whole-body | none      |
| 536 | M63Fotr  | 968          | right plantar foot       | right sole of foot     | Skin         | M6              | 9/17/08 | swab w/ sterile saline     | whole-body | none      |
| 537 | M63Frhd  | 1185         | forehead                 | forehead               | Skin         | M6              | 9/17/08 | swab w/ sterile saline     | whole-body | none      |
| 538 | M63Knee  | 946          | popliteal fossae         | back of knees          | Skin         | M6              | 9/17/08 | swab w/ sterile saline     | whole-body | none      |
| 539 | M63Nost  | 1185         | nares                    | nostrils               | Nostril      | M6              | 9/17/08 | swab w/ sterile saline     | whole-body | none      |
| 540 | M63Plml  | 1056         | left palm                | left palm              | Skin         | M6              | 9/17/08 | swab w/ sterile saline     | whole-body | none      |

**Table S1.** Sample information

| #   | SampleID | No. of reads | Sample site (anatomical) | Sample site (common)   | Body habitat | Host sex, indiv | Day     | Sample method              | Study      | Treatment                                                 |
|-----|----------|--------------|--------------------------|------------------------|--------------|-----------------|---------|----------------------------|------------|-----------------------------------------------------------|
| 541 | M63PImr  | 1183         | right palm               | right palm             | Skin         | M6              | 9/17/08 | swab w/ sterile saline     | whole-body | none                                                      |
| 542 | M63Tong  | 1505         | dorsal surface of tongue | tongue                 | Oral cavity  | M6              | 9/17/08 | swab                       | whole-body | none                                                      |
| 543 | M64Ewax  | 1173         | external auditory canal  | outer ear canal/earwax | EAC          | M6              | 9/18/08 | swab                       | whole-body | none                                                      |
| 544 | M64Fcsw  | 1664         | stool                    | stool                  | Gut          | M6              | 9/18/08 | swab off used toilet paper | whole-body | none                                                      |
| 545 | M64Fotl  | 1396         | left plantar foot        | left sole of foot      | Skin         | M6              | 9/18/08 | swab w/ sterile saline     | whole-body | none                                                      |
| 546 | M64Fotr  | 1330         | right plantar foot       | right sole of foot     | Skin         | M6              | 9/18/08 | swab w/ sterile saline     | whole-body | none                                                      |
| 547 | M64Frhd  | 1130         | forehead                 | forehead               | Skin         | M6              | 9/18/08 | swab w/ sterile saline     | whole-body | none                                                      |
| 548 | M64Knee  | 1240         | popliteal fossae         | back of knees          | Skin         | M6              | 9/18/08 | swab w/ sterile saline     | whole-body | none                                                      |
| 549 | M64Nost  | 1280         | nares                    | nostrils               | Nostril      | M6              | 9/18/08 | swab w/ sterile saline     | whole-body | none                                                      |
| 550 | M64Plml  | 1324         | left palm                | left palm              | Skin         | M6              | 9/18/08 | swab w/ sterile saline     | whole-body | none                                                      |
| 551 | M64PImr  | 1356         | right palm               | right palm             | Skin         | M6              | 9/18/08 | swab w/ sterile saline     | whole-body | none                                                      |
| 552 | M64Tong  | 1953         | dorsal surface of tongue | tongue                 | Oral cavity  | M6              | 9/18/08 | swab                       | whole-body | none                                                      |
| 553 | F210A1   | 1238         | left volar forearm       | forearm                | Skin         | F2              | day 1   | swab w/ sterile saline     | transplant | none                                                      |
| 554 | F210A2   | 1202         | left volar forearm       | forearm                | Skin         | F2              | day 1   | swab w/ sterile saline     | transplant | none                                                      |
| 555 | F210A3   | 1316         | left volar forearm       | forearm                | Skin         | F2              | day 1   | swab w/ sterile saline     | transplant | none                                                      |
| 556 | F210A4   | 1216         | left volar forearm       | forearm                | Skin         | F2              | day 1   | swab w/ sterile saline     | transplant | none                                                      |
| 557 | F210H5   | 1377         | forehead                 | forehead               | Skin         | F2              | day 1   | swab w/ sterile saline     | transplant | none                                                      |
| 558 | F210H6   | 1428         | forehead                 | forehead               | Skin         | F2              | day 1   | swab w/ sterile saline     | transplant | none                                                      |
| 559 | F210H7   | 1535         | forehead                 | forehead               | Skin         | F2              | day 1   | swab w/ sterile saline     | transplant | none                                                      |
| 560 | F210H8   | 1520         | forehead                 | forehead               | Skin         | F2              | day 1   | swab w/ sterile saline     | transplant | none                                                      |
| 561 | F210T    | 835          | dorsal surface of tongue | tongue                 | Oral cavity  | F2              | day 1   | swab                       | transplant | none                                                      |
| 562 | F212A1   | 1308         | left volar forearm       | forearm                | Skin         | F2              | day 1   | swab w/ sterile saline     | transplant | disinfect./inoc. with forehead from self (2hrs)           |
| 563 | F212A2   | 1350         | left volar forearm       | forearm                | Skin         | F2              | day 1   | swab w/ sterile saline     | transplant | disinfect./inoc. with forehead from same-sex other (2hrs) |
| 564 | F212A3   | 1254         | left volar forearm       | forearm                | Skin         | F2              | day 1   | swab w/ sterile saline     | transplant | disinfect./inoc. with tongue from self (2hrs)             |
| 565 | F212A4   | 1240         | left volar forearm       | forearm                | Skin         | F2              | day 1   | swab w/ sterile saline     | transplant | disinfect./inoc. with tongue from same-sex other (2hrs)   |
| 566 | F212H5   | 1409         | forehead                 | forehead               | Skin         | F2              | day 1   | swab w/ sterile saline     | transplant | disinfect./inoc. with forearm from self (2hrs)            |
| 567 | F212H6   | 1210         | forehead                 | forehead               | Skin         | F2              | day 1   | swab w/ sterile saline     | transplant | disinfect./inoc. with forearm from same-sex other (2hrs)  |
| 568 | F212H7   | 1502         | forehead                 | forehead               | Skin         | F2              | day 1   | swab w/ sterile saline     | transplant | disinfect./inoc. with tongue from self (2hrs)             |
| 569 | F212H8   | 1409         | forehead                 | forehead               | Skin         | F2              | day 1   | swab w/ sterile saline     | transplant | disinfect./inoc. with tongue from same-sex other (2hrs)   |
| 570 | F214A1   | 1203         | left volar forearm       | forearm                | Skin         | F2              | day 1   | swab w/ sterile saline     | transplant | disinfect./inoc. with forehead from self (4hrs)           |
| 571 | F214A2   | 1216         | left volar forearm       | forearm                | Skin         | F2              | day 1   | swab w/ sterile saline     | transplant | disinfect./inoc. with forehead from same-sex other (4hrs) |
| 572 | F214A3   | 1177         | left volar forearm       | forearm                | Skin         | F2              | day 1   | swab w/ sterile saline     | transplant | disinfect./inoc. with tongue from self (4hrs)             |
| 573 | F214A4   | 1246         | left volar forearm       | forearm                | Skin         | F2              | day 1   | swab w/ sterile saline     | transplant | disinfect./inoc. with tongue from same-sex other (4hrs)   |
| 574 | F214H5   | 1500         | forehead                 | forehead               | Skin         | F2              | day 1   | swab w/ sterile saline     | transplant | disinfect./inoc. with forearm from self (4hrs)            |
| 575 | F214H6   | 1558         | forehead                 | forehead               | Skin         | F2              | day 1   | swab w/ sterile saline     | transplant | disinfect./inoc. with forearm from same-sex other (4hrs)  |
| 576 | F214H7   | 1356         | forehead                 | forehead               | Skin         | F2              | day 1   | swab w/ sterile saline     | transplant | disinfect./inoc. with tongue from self (4hrs)             |

**Table S1.** Sample information

| #   | SampleID | No. of reads | Sample site (anatomical) | Sample site (common) | Body habitat | Host sex, indiv | Day   | Sample method          | Study      | Treatment                                                 |
|-----|----------|--------------|--------------------------|----------------------|--------------|-----------------|-------|------------------------|------------|-----------------------------------------------------------|
| 577 | F214H8   | 1410         | forehead                 | forehead             | Skin         | F2              | day 1 | swab w/ sterile saline | transplant | disinfect./inoc. with tongue from same-sex other (4hrs)   |
| 578 | F218A1   | 1234         | left volar forearm       | forearm              | Skin         | F2              | day 1 | swab w/ sterile saline | transplant | disinfect./inoc. with forehead from self (8hrs)           |
| 579 | F218A2   | 1261         | left volar forearm       | forearm              | Skin         | F2              | day 1 | swab w/ sterile saline | transplant | disinfect./inoc. with forehead from same-sex other (8hrs) |
| 580 | F218A3   | 1233         | left volar forearm       | forearm              | Skin         | F2              | day 1 | swab w/ sterile saline | transplant | disinfect./inoc. with tongue from self (8hrs)             |
| 581 | F218A4   | 1227         | left volar forearm       | forearm              | Skin         | F2              | day 1 | swab w/ sterile saline | transplant | disinfect./inoc. with tongue from same-sex other (8hrs)   |
| 582 | F218H5   | 1514         | forehead                 | forehead             | Skin         | F2              | day 1 | swab w/ sterile saline | transplant | disinfect./inoc. with forearm from self (8hrs)            |
| 583 | F218H6   | 1443         | forehead                 | forehead             | Skin         | F2              | day 1 | swab w/ sterile saline | transplant | disinfect./inoc. with forearm from same-sex other (8hrs)  |
| 584 | F218H7   | 1493         | forehead                 | forehead             | Skin         | F2              | day 1 | swab w/ sterile saline | transplant | disinfect./inoc. with tongue from self (8hrs)             |
| 585 | F218H8   | 1648         | forehead                 | forehead             | Skin         | F2              | day 1 | swab w/ sterile saline | transplant | disinfect./inoc. with tongue from same-sex other (8hrs)   |
| 586 | F220A1   | 1353         | left volar forearm       | forearm              | Skin         | F2              | day 2 | swab w/ sterile saline | transplant | none                                                      |
| 587 | F220A2   | 1381         | left volar forearm       | forearm              | Skin         | F2              | day 2 | swab w/ sterile saline | transplant | none                                                      |
| 588 | F220A3   | 1261         | left volar forearm       | forearm              | Skin         | F2              | day 2 | swab w/ sterile saline | transplant | none                                                      |
| 589 | F220A4   | 1329         | left volar forearm       | forearm              | Skin         | F2              | day 2 | swab w/ sterile saline | transplant | none                                                      |
| 590 | F220H5   | 1395         | forehead                 | forehead             | Skin         | F2              | day 2 | swab w/ sterile saline | transplant | none                                                      |
| 591 | F220H6   | 1478         | forehead                 | forehead             | Skin         | F2              | day 2 | swab w/ sterile saline | transplant | none                                                      |
| 592 | F220H7   | 1461         | forehead                 | forehead             | Skin         | F2              | day 2 | swab w/ sterile saline | transplant | none                                                      |
| 593 | F220H8   | 1549         | forehead                 | forehead             | Skin         | F2              | day 2 | swab w/ sterile saline | transplant | none                                                      |
| 594 | F220T    | 723          | dorsal surface of tongue | tongue               | Oral cavity  | F2              | day 2 | swab                   | transplant | none                                                      |
| 595 | F222A1   | 1342         | left volar forearm       | forearm              | Skin         | F2              | day 2 | swab w/ sterile saline | transplant | disinfect./inoc. with forehead from self (2hrs)           |
| 596 | F222A2   | 1279         | left volar forearm       | forearm              | Skin         | F2              | day 2 | swab w/ sterile saline | transplant | disinfect./inoc. with forehead from same-sex other (2hrs) |
| 597 | F222A3   | 1183         | left volar forearm       | forearm              | Skin         | F2              | day 2 | swab w/ sterile saline | transplant | disinfect./inoc. with tongue from self (2hrs)             |
| 598 | F222A4   | 1349         | left volar forearm       | forearm              | Skin         | F2              | day 2 | swab w/ sterile saline | transplant | disinfect./inoc. with tongue from same-sex other (2hrs)   |
| 599 | F222H5   | 1361         | forehead                 | forehead             | Skin         | F2              | day 2 | swab w/ sterile saline | transplant | disinfect./inoc. with forearm from self (2hrs)            |
| 600 | F222H6   | 1384         | forehead                 | forehead             | Skin         | F2              | day 2 | swab w/ sterile saline | transplant | disinfect./inoc. with forearm from same-sex other (2hrs)  |
| 601 | F222H7   | 1289         | forehead                 | forehead             | Skin         | F2              | day 2 | swab w/ sterile saline | transplant | disinfect./inoc. with tongue from self (2hrs)             |
| 602 | F222H8   | 1384         | forehead                 | forehead             | Skin         | F2              | day 2 | swab w/ sterile saline | transplant | disinfect./inoc. with tongue from same-sex other (2hrs)   |
| 603 | F224A1   | 1323         | left volar forearm       | forearm              | Skin         | F2              | day 2 | swab w/ sterile saline | transplant | disinfect./inoc. with forehead from self (4hrs)           |
| 604 | F224A2   | 1328         | left volar forearm       | forearm              | Skin         | F2              | day 2 | swab w/ sterile saline | transplant | disinfect./inoc. with forehead from same-sex other (4hrs) |
| 605 | F224A3   | 1074         | left volar forearm       | forearm              | Skin         | F2              | day 2 | swab w/ sterile saline | transplant | disinfect./inoc. with tongue from self (4hrs)             |
| 606 | F224A4   | 1216         | left volar forearm       | forearm              | Skin         | F2              | day 2 | swab w/ sterile saline | transplant | disinfect./inoc. with tongue from same-sex other (4hrs)   |
| 607 | F224H5   | 1502         | forehead                 | forehead             | Skin         | F2              | day 2 | swab w/ sterile saline | transplant | disinfect./inoc. with forearm from self (4hrs)            |
| 608 | F224H6   | 1307         | forehead                 | forehead             | Skin         | F2              | day 2 | swab w/ sterile saline | transplant | disinfect./inoc. with forearm from same-sex other (4hrs)  |
| 609 | F224H7   | 1427         | forehead                 | forehead             | Skin         | F2              | day 2 | swab w/ sterile saline | transplant | disinfect./inoc. with tongue from self (4hrs)             |
| 610 | F224H8   | 1291         | forehead                 | forehead             | Skin         | F2              | day 2 | swab w/ sterile saline | transplant | disinfect./inoc. with tongue from same-sex other (4hrs)   |
| 611 | F228A1   | 1347         | left volar forearm       | forearm              | Skin         | F2              | day 2 | swab w/ sterile saline | transplant | disinfect./inoc. with forehead from self (8hrs)           |
| 612 | F228A2   | 1063         | left volar forearm       | forearm              | Skin         | F2              | day 2 | swab w/ sterile saline | transplant | disinfect./inoc. with forehead from same-sex other (8hrs) |



**Table S1.** Sample information

| #   | SampleID | No. of reads | Sample site (anatomical) | Sample site (common) | Body habitat | Host sex, indiv | Day   | Sample method          | Study      | Treatment                                                 |
|-----|----------|--------------|--------------------------|----------------------|--------------|-----------------|-------|------------------------|------------|-----------------------------------------------------------|
| 613 | F228A3   | 1084         | left volar forearm       | forearm              | Skin         | F2              | day 2 | swab w/ sterile saline | transplant | disinfect./inoc. with tongue from self (8hrs)             |
| 614 | F228A4   | 1296         | left volar forearm       | forearm              | Skin         | F2              | day 2 | swab w/ sterile saline | transplant | disinfect./inoc. with tongue from same-sex other (8hrs)   |
| 615 | F228H5   | 1497         | forehead                 | forehead             | Skin         | F2              | day 2 | swab w/ sterile saline | transplant | disinfect./inoc. with forearm from self (8hrs)            |
| 616 | F228H6   | 1416         | forehead                 | forehead             | Skin         | F2              | day 2 | swab w/ sterile saline | transplant | disinfect./inoc. with forearm from same-sex other (8hrs)  |
| 617 | F228H7   | 1363         | forehead                 | forehead             | Skin         | F2              | day 2 | swab w/ sterile saline | transplant | disinfect./inoc. with tongue from self (8hrs)             |
| 618 | F228H8   | 1315         | forehead                 | forehead             | Skin         | F2              | day 2 | swab w/ sterile saline | transplant | disinfect./inoc. with tongue from same-sex other (8hrs)   |
| 619 | F310A1   | 1437         | left volar forearm       | forearm              | Skin         | F3              | day 1 | swab w/ sterile saline | transplant | none                                                      |
| 620 | F310A2   | 1344         | left volar forearm       | forearm              | Skin         | F3              | day 1 | swab w/ sterile saline | transplant | none                                                      |
| 621 | F310A3   | 1444         | left volar forearm       | forearm              | Skin         | F3              | day 1 | swab w/ sterile saline | transplant | none                                                      |
| 622 | F310A4   | 1381         | left volar forearm       | forearm              | Skin         | F3              | day 1 | swab w/ sterile saline | transplant | none                                                      |
| 623 | F310H5   | 1380         | forehead                 | forehead             | Skin         | F3              | day 1 | swab w/ sterile saline | transplant | none                                                      |
| 624 | F310H6   | 875          | forehead                 | forehead             | Skin         | F3              | day 1 | swab w/ sterile saline | transplant | none                                                      |
| 625 | F310H7   | 1543         | forehead                 | forehead             | Skin         | F3              | day 1 | swab w/ sterile saline | transplant | none                                                      |
| 626 | F310H8   | 1472         | forehead                 | forehead             | Skin         | F3              | day 1 | swab w/ sterile saline | transplant | none                                                      |
| 627 | F310T    | 751          | dorsal surface of tongue | tongue               | Oral cavity  | F3              | day 1 | swab                   | transplant | none                                                      |
| 628 | F312A1   | 1103         | left volar forearm       | forearm              | Skin         | F3              | day 1 | swab w/ sterile saline | transplant | disinfect./inoc. with forehead from self (2hrs)           |
| 629 | F312A2   | 1287         | left volar forearm       | forearm              | Skin         | F3              | day 1 | swab w/ sterile saline | transplant | disinfect./inoc. with forehead from same-sex other (2hrs) |
| 630 | F312A3   | 1257         | left volar forearm       | forearm              | Skin         | F3              | day 1 | swab w/ sterile saline | transplant | disinfect./inoc. with tongue from self (2hrs)             |
| 631 | F312A4   | 1248         | left volar forearm       | forearm              | Skin         | F3              | day 1 | swab w/ sterile saline | transplant | disinfect./inoc. with tongue from same-sex other (2hrs)   |
| 632 | F312H5   | 1340         | forehead                 | forehead             | Skin         | F3              | day 1 | swab w/ sterile saline | transplant | disinfect./inoc. with forearm from self (2hrs)            |
| 633 | F312H6   | 1403         | forehead                 | forehead             | Skin         | F3              | day 1 | swab w/ sterile saline | transplant | disinfect./inoc. with forearm from same-sex other (2hrs)  |
| 634 | F312H7   | 1045         | forehead                 | forehead             | Skin         | F3              | day 1 | swab w/ sterile saline | transplant | disinfect./inoc. with tongue from self (2hrs)             |
| 635 | F312H8   | 1348         | forehead                 | forehead             | Skin         | F3              | day 1 | swab w/ sterile saline | transplant | disinfect./inoc. with tongue from same-sex other (2hrs)   |
| 636 | F314A1   | 1175         | left volar forearm       | forearm              | Skin         | F3              | day 1 | swab w/ sterile saline | transplant | disinfect./inoc. with forehead from self (4hrs)           |
| 637 | F314A2   | 1241         | left volar forearm       | forearm              | Skin         | F3              | day 1 | swab w/ sterile saline | transplant | disinfect./inoc. with forehead from same-sex other (4hrs) |
| 638 | F314A3   | 1087         | left volar forearm       | forearm              | Skin         | F3              | day 1 | swab w/ sterile saline | transplant | disinfect./inoc. with tongue from self (4hrs)             |
| 639 | F314A4   | 1228         | left volar forearm       | forearm              | Skin         | F3              | day 1 | swab w/ sterile saline | transplant | disinfect./inoc. with tongue from same-sex other (4hrs)   |
| 640 | F314H5   | 1404         | forehead                 | forehead             | Skin         | F3              | day 1 | swab w/ sterile saline | transplant | disinfect./inoc. with forearm from self (4hrs)            |
| 641 | F314H6   | 1327         | forehead                 | forehead             | Skin         | F3              | day 1 | swab w/ sterile saline | transplant | disinfect./inoc. with forearm from same-sex other (4hrs)  |
| 642 | F314H7   | 1219         | forehead                 | forehead             | Skin         | F3              | day 1 | swab w/ sterile saline | transplant | disinfect./inoc. with tongue from self (4hrs)             |
| 643 | F314H8   | 1245         | forehead                 | forehead             | Skin         | F3              | day 1 | swab w/ sterile saline | transplant | disinfect./inoc. with tongue from same-sex other (4hrs)   |
| 644 | F318A1   | 1237         | left volar forearm       | forearm              | Skin         | F3              | day 1 | swab w/ sterile saline | transplant | disinfect./inoc. with forehead from self (8hrs)           |
| 645 | F318A2   | 1368         | left volar forearm       | forearm              | Skin         | F3              | day 1 | swab w/ sterile saline | transplant | disinfect./inoc. with forehead from same-sex other (8hrs) |
| 646 | F318A3   | 1108         | left volar forearm       | forearm              | Skin         | F3              | day 1 | swab w/ sterile saline | transplant | disinfect./inoc. with tongue from self (8hrs)             |
| 647 | F318A4   | 1251         | left volar forearm       | forearm              | Skin         | F3              | day 1 | swab w/ sterile saline | transplant | disinfect./inoc. with tongue from same-sex other (8hrs)   |
| 648 | F318H5   | 1496         | forehead                 | forehead             | Skin         | F3              | day 1 | swab w/ sterile saline | transplant | disinfect./inoc. with forearm from self (8hrs)            |

**Table S1.** Sample information

| #   | SampleID | No. of reads | Sample site (anatomical) | Sample site (common) | Body habitat | Host sex, indiv | Day   | Sample method          | Study      | Treatment                                                 |
|-----|----------|--------------|--------------------------|----------------------|--------------|-----------------|-------|------------------------|------------|-----------------------------------------------------------|
| 649 | F318H6   | 1339         | forehead                 | forehead             | Skin         | F3              | day 1 | swab w/ sterile saline | transplant | disinfect./inoc. with forearm from same-sex other (8hrs)  |
| 650 | F318H7   | 1400         | forehead                 | forehead             | Skin         | F3              | day 1 | swab w/ sterile saline | transplant | disinfect./inoc. with tongue from self (8hrs)             |
| 651 | F318H8   | 1370         | forehead                 | forehead             | Skin         | F3              | day 1 | swab w/ sterile saline | transplant | disinfect./inoc. with tongue from same-sex other (8hrs)   |
| 652 | F320A1   | 1012         | left volar forearm       | forearm              | Skin         | F3              | day 2 | swab w/ sterile saline | transplant | none                                                      |
| 653 | F320A2   | 1507         | left volar forearm       | forearm              | Skin         | F3              | day 2 | swab w/ sterile saline | transplant | none                                                      |
| 654 | F320A3   | 1407         | left volar forearm       | forearm              | Skin         | F3              | day 2 | swab w/ sterile saline | transplant | none                                                      |
| 655 | F320A4   | 1402         | left volar forearm       | forearm              | Skin         | F3              | day 2 | swab w/ sterile saline | transplant | none                                                      |
| 656 | F320H5   | 1468         | forehead                 | forehead             | Skin         | F3              | day 2 | swab w/ sterile saline | transplant | none                                                      |
| 657 | F320H6   | 1415         | forehead                 | forehead             | Skin         | F3              | day 2 | swab w/ sterile saline | transplant | none                                                      |
| 658 | F320H7   | 1478         | forehead                 | forehead             | Skin         | F3              | day 2 | swab w/ sterile saline | transplant | none                                                      |
| 659 | F320H8   | 1465         | forehead                 | forehead             | Skin         | F3              | day 2 | swab w/ sterile saline | transplant | none                                                      |
| 660 | F320T    | 938          | dorsal surface of tongue | tongue               | Oral cavity  | F3              | day 2 | swab                   | transplant | none                                                      |
| 661 | F322A1   | 1480         | left volar forearm       | forearm              | Skin         | F3              | day 2 | swab w/ sterile saline | transplant | disinfect./inoc. with forehead from self (2hrs)           |
| 662 | F322A2   | 1532         | left volar forearm       | forearm              | Skin         | F3              | day 2 | swab w/ sterile saline | transplant | disinfect./inoc. with forehead from same-sex other (2hrs) |
| 663 | F322A3   | 1222         | left volar forearm       | forearm              | Skin         | F3              | day 2 | swab w/ sterile saline | transplant | disinfect./inoc. with tongue from self (2hrs)             |
| 664 | F322A4   | 1461         | left volar forearm       | forearm              | Skin         | F3              | day 2 | swab w/ sterile saline | transplant | disinfect./inoc. with tongue from same-sex other (2hrs)   |
| 665 | F322H5   | 1461         | forehead                 | forehead             | Skin         | F3              | day 2 | swab w/ sterile saline | transplant | disinfect./inoc. with forearm from self (2hrs)            |
| 666 | F322H6   | 1398         | forehead                 | forehead             | Skin         | F3              | day 2 | swab w/ sterile saline | transplant | disinfect./inoc. with forearm from same-sex other (2hrs)  |
| 667 | F322H7   | 1502         | forehead                 | forehead             | Skin         | F3              | day 2 | swab w/ sterile saline | transplant | disinfect./inoc. with tongue from self (2hrs)             |
| 668 | F322H8   | 1479         | forehead                 | forehead             | Skin         | F3              | day 2 | swab w/ sterile saline | transplant | disinfect./inoc. with tongue from same-sex other (2hrs)   |
| 669 | F324A1   | 1487         | left volar forearm       | forearm              | Skin         | F3              | day 2 | swab w/ sterile saline | transplant | disinfect./inoc. with forehead from self (4hrs)           |
| 670 | F324A2   | 1517         | left volar forearm       | forearm              | Skin         | F3              | day 2 | swab w/ sterile saline | transplant | disinfect./inoc. with forehead from same-sex other (4hrs) |
| 671 | F324A3   | 1308         | left volar forearm       | forearm              | Skin         | F3              | day 2 | swab w/ sterile saline | transplant | disinfect./inoc. with tongue from self (4hrs)             |
| 672 | F324A4   | 1379         | left volar forearm       | forearm              | Skin         | F3              | day 2 | swab w/ sterile saline | transplant | disinfect./inoc. with tongue from same-sex other (4hrs)   |
| 673 | F324H5   | 1410         | forehead                 | forehead             | Skin         | F3              | day 2 | swab w/ sterile saline | transplant | disinfect./inoc. with forearm from self (4hrs)            |
| 674 | F324H6   | 1424         | forehead                 | forehead             | Skin         | F3              | day 2 | swab w/ sterile saline | transplant | disinfect./inoc. with forearm from same-sex other (4hrs)  |
| 675 | F324H7   | 1384         | forehead                 | forehead             | Skin         | F3              | day 2 | swab w/ sterile saline | transplant | disinfect./inoc. with tongue from self (4hrs)             |
| 676 | F324H8   | 1390         | forehead                 | forehead             | Skin         | F3              | day 2 | swab w/ sterile saline | transplant | disinfect./inoc. with tongue from same-sex other (4hrs)   |
| 677 | F328A1   | 1467         | left volar forearm       | forearm              | Skin         | F3              | day 2 | swab w/ sterile saline | transplant | disinfect./inoc. with forehead from self (8hrs)           |
| 678 | F328A2   | 1260         | left volar forearm       | forearm              | Skin         | F3              | day 2 | swab w/ sterile saline | transplant | disinfect./inoc. with forehead from same-sex other (8hrs) |
| 679 | F328A3   | 1251         | left volar forearm       | forearm              | Skin         | F3              | day 2 | swab w/ sterile saline | transplant | disinfect./inoc. with tongue from self (8hrs)             |
| 680 | F328A4   | 1340         | left volar forearm       | forearm              | Skin         | F3              | day 2 | swab w/ sterile saline | transplant | disinfect./inoc. with tongue from same-sex other (8hrs)   |
| 681 | F328H5   | 1451         | forehead                 | forehead             | Skin         | F3              | day 2 | swab w/ sterile saline | transplant | disinfect./inoc. with forearm from self (8hrs)            |
| 682 | F328H6   | 1404         | forehead                 | forehead             | Skin         | F3              | day 2 | swab w/ sterile saline | transplant | disinfect./inoc. with forearm from same-sex other (8hrs)  |
| 683 | F328H7   | 1470         | forehead                 | forehead             | Skin         | F3              | day 2 | swab w/ sterile saline | transplant | disinfect./inoc. with tongue from self (8hrs)             |
| 684 | F328H8   | 1347         | forehead                 | forehead             | Skin         | F3              | day 2 | swab w/ sterile saline | transplant | disinfect./inoc. with tongue from same-sex other (8hrs)   |

**Table S1.** Sample information

| #   | SampleID | No. of reads | Sample site (anatomical) | Sample site (common) | Body habitat | Host sex, indiv | Day   | Sample method          | Study      | Treatment                                                 |
|-----|----------|--------------|--------------------------|----------------------|--------------|-----------------|-------|------------------------|------------|-----------------------------------------------------------|
| 685 | M110A1   | 1286         | left volar forearm       | forearm              | Skin         | M1              | day 1 | swab w/ sterile saline | transplant | none                                                      |
| 686 | M110A2   | 1399         | left volar forearm       | forearm              | Skin         | M1              | day 1 | swab w/ sterile saline | transplant | none                                                      |
| 687 | M110A3   | 1377         | left volar forearm       | forearm              | Skin         | M1              | day 1 | swab w/ sterile saline | transplant | none                                                      |
| 688 | M110A4   | 1464         | left volar forearm       | forearm              | Skin         | M1              | day 1 | swab w/ sterile saline | transplant | none                                                      |
| 689 | M110H5   | 1395         | forehead                 | forehead             | Skin         | M1              | day 1 | swab w/ sterile saline | transplant | none                                                      |
| 690 | M110H6   | 1471         | forehead                 | forehead             | Skin         | M1              | day 1 | swab w/ sterile saline | transplant | none                                                      |
| 691 | M110H7   | 1413         | forehead                 | forehead             | Skin         | M1              | day 1 | swab w/ sterile saline | transplant | none                                                      |
| 692 | M110H8   | 1494         | forehead                 | forehead             | Skin         | M1              | day 1 | swab w/ sterile saline | transplant | none                                                      |
| 693 | M110T    | 905          | dorsal surface of tongue | tongue               | Oral cavity  | M1              | day 1 | swab                   | transplant | none                                                      |
| 694 | M112A1   | 1285         | left volar forearm       | forearm              | Skin         | M1              | day 1 | swab w/ sterile saline | transplant | disinfect./inoc. with forehead from self (2hrs)           |
| 695 | M112A2   | 1174         | left volar forearm       | forearm              | Skin         | M1              | day 1 | swab w/ sterile saline | transplant | disinfect./inoc. with forehead from same-sex other (2hrs) |
| 696 | M112A3   | 1243         | left volar forearm       | forearm              | Skin         | M1              | day 1 | swab w/ sterile saline | transplant | disinfect./inoc. with tongue from self (2hrs)             |
| 697 | M112A4   | 1256         | left volar forearm       | forearm              | Skin         | M1              | day 1 | swab w/ sterile saline | transplant | disinfect./inoc. with tongue from same-sex other (2hrs)   |
| 698 | M112H5   | 1208         | forehead                 | forehead             | Skin         | M1              | day 1 | swab w/ sterile saline | transplant | disinfect./inoc. with forearm from self (2hrs)            |
| 699 | M112H6   | 1281         | forehead                 | forehead             | Skin         | M1              | day 1 | swab w/ sterile saline | transplant | disinfect./inoc. with forearm from same-sex other (2hrs)  |
| 700 | M112H7   | 1351         | forehead                 | forehead             | Skin         | M1              | day 1 | swab w/ sterile saline | transplant | disinfect./inoc. with tongue from self (2hrs)             |
| 701 | M112H8   | 1284         | forehead                 | forehead             | Skin         | M1              | day 1 | swab w/ sterile saline | transplant | disinfect./inoc. with tongue from same-sex other (2hrs)   |
| 702 | M114A1   | 1230         | left volar forearm       | forearm              | Skin         | M1              | day 1 | swab w/ sterile saline | transplant | disinfect./inoc. with forehead from self (4hrs)           |
| 703 | M114A2   | 1330         | left volar forearm       | forearm              | Skin         | M1              | day 1 | swab w/ sterile saline | transplant | disinfect./inoc. with forehead from same-sex other (4hrs) |
| 704 | M114A3   | 1279         | left volar forearm       | forearm              | Skin         | M1              | day 1 | swab w/ sterile saline | transplant | disinfect./inoc. with tongue from self (4hrs)             |
| 705 | M114A4   | 1315         | left volar forearm       | forearm              | Skin         | M1              | day 1 | swab w/ sterile saline | transplant | disinfect./inoc. with tongue from same-sex other (4hrs)   |
| 706 | M114H5   | 1313         | forehead                 | forehead             | Skin         | M1              | day 1 | swab w/ sterile saline | transplant | disinfect./inoc. with forearm from self (4hrs)            |
| 707 | M114H6   | 1543         | forehead                 | forehead             | Skin         | M1              | day 1 | swab w/ sterile saline | transplant | disinfect./inoc. with forearm from same-sex other (4hrs)  |
| 708 | M114H7   | 1412         | forehead                 | forehead             | Skin         | M1              | day 1 | swab w/ sterile saline | transplant | disinfect./inoc. with tongue from self (4hrs)             |
| 709 | M114H8   | 1279         | forehead                 | forehead             | Skin         | M1              | day 1 | swab w/ sterile saline | transplant | disinfect./inoc. with tongue from same-sex other (4hrs)   |
| 710 | M118A1   | 1208         | left volar forearm       | forearm              | Skin         | M1              | day 1 | swab w/ sterile saline | transplant | disinfect./inoc. with forehead from self (8hrs)           |
| 711 | M118A2   | 1302         | left volar forearm       | forearm              | Skin         | M1              | day 1 | swab w/ sterile saline | transplant | disinfect./inoc. with forehead from same-sex other (8hrs) |
| 712 | M118A3   | 1202         | left volar forearm       | forearm              | Skin         | M1              | day 1 | swab w/ sterile saline | transplant | disinfect./inoc. with tongue from self (8hrs)             |
| 713 | M118A4   | 1200         | left volar forearm       | forearm              | Skin         | M1              | day 1 | swab w/ sterile saline | transplant | disinfect./inoc. with tongue from same-sex other (8hrs)   |
| 714 | M118H5   | 1092         | forehead                 | forehead             | Skin         | M1              | day 1 | swab w/ sterile saline | transplant | disinfect./inoc. with forearm from self (8hrs)            |
| 715 | M118H6   | 1402         | forehead                 | forehead             | Skin         | M1              | day 1 | swab w/ sterile saline | transplant | disinfect./inoc. with forearm from same-sex other (8hrs)  |
| 716 | M118H7   | 1292         | forehead                 | forehead             | Skin         | M1              | day 1 | swab w/ sterile saline | transplant | disinfect./inoc. with tongue from self (8hrs)             |
| 717 | M118H8   | 1437         | forehead                 | forehead             | Skin         | M1              | day 1 | swab w/ sterile saline | transplant | disinfect./inoc. with tongue from same-sex other (8hrs)   |
| 718 | M120A1   | 1364         | left volar forearm       | forearm              | Skin         | M1              | day 2 | swab w/ sterile saline | transplant | none                                                      |
| 719 | M120A2   | 1345         | left volar forearm       | forearm              | Skin         | M1              | day 2 | swab w/ sterile saline | transplant | none                                                      |
| 720 | M120A3   | 1399         | left volar forearm       | forearm              | Skin         | M1              | day 2 | swab w/ sterile saline | transplant | none                                                      |

**Table S1.** Sample information

| #   | SampleID | No. of reads | Sample site (anatomical) | Sample site (common) | Body habitat | Host sex, indiv | Day   | Sample method          | Study      | Treatment                                                 |
|-----|----------|--------------|--------------------------|----------------------|--------------|-----------------|-------|------------------------|------------|-----------------------------------------------------------|
| 721 | M120A4   | 1331         | left volar forearm       | forearm              | Skin         | M1              | day 2 | swab w/ sterile saline | transplant | none                                                      |
| 722 | M120H5   | 1302         | forehead                 | forehead             | Skin         | M1              | day 2 | swab w/ sterile saline | transplant | none                                                      |
| 723 | M120H6   | 1387         | forehead                 | forehead             | Skin         | M1              | day 2 | swab w/ sterile saline | transplant | none                                                      |
| 724 | M120H7   | 1384         | forehead                 | forehead             | Skin         | M1              | day 2 | swab w/ sterile saline | transplant | none                                                      |
| 725 | M120H8   | 1459         | forehead                 | forehead             | Skin         | M1              | day 2 | swab w/ sterile saline | transplant | none                                                      |
| 726 | M120T    | 896          | dorsal surface of tongue | tongue               | Oral cavity  | M1              | day 2 | swab                   | transplant | none                                                      |
| 727 | M122A1   | 1351         | left volar forearm       | forearm              | Skin         | M1              | day 2 | swab w/ sterile saline | transplant | disinfect./inoc. with forehead from self (2hrs)           |
| 728 | M122A2   | 1314         | left volar forearm       | forearm              | Skin         | M1              | day 2 | swab w/ sterile saline | transplant | disinfect./inoc. with forehead from same-sex other (2hrs) |
| 729 | M122A3   | 1287         | left volar forearm       | forearm              | Skin         | M1              | day 2 | swab w/ sterile saline | transplant | disinfect./inoc. with tongue from self (2hrs)             |
| 730 | M122A4   | 1060         | left volar forearm       | forearm              | Skin         | M1              | day 2 | swab w/ sterile saline | transplant | disinfect./inoc. with tongue from same-sex other (2hrs)   |
| 731 | M122H5   | 1314         | forehead                 | forehead             | Skin         | M1              | day 2 | swab w/ sterile saline | transplant | disinfect./inoc. with forearm from self (2hrs)            |
| 732 | M122H6   | 1404         | forehead                 | forehead             | Skin         | M1              | day 2 | swab w/ sterile saline | transplant | disinfect./inoc. with forearm from same-sex other (2hrs)  |
| 733 | M122H7   | 1332         | forehead                 | forehead             | Skin         | M1              | day 2 | swab w/ sterile saline | transplant | disinfect./inoc. with tongue from self (2hrs)             |
| 734 | M122H8   | 1355         | forehead                 | forehead             | Skin         | M1              | day 2 | swab w/ sterile saline | transplant | disinfect./inoc. with tongue from same-sex other (2hrs)   |
| 735 | M124A1   | 1339         | left volar forearm       | forearm              | Skin         | M1              | day 2 | swab w/ sterile saline | transplant | disinfect./inoc. with forehead from self (4hrs)           |
| 736 | M124A2   | 1221         | left volar forearm       | forearm              | Skin         | M1              | day 2 | swab w/ sterile saline | transplant | disinfect./inoc. with forehead from same-sex other (4hrs) |
| 737 | M124A3   | 1224         | left volar forearm       | forearm              | Skin         | M1              | day 2 | swab w/ sterile saline | transplant | disinfect./inoc. with tongue from self (4hrs)             |
| 738 | M124A4   | 1097         | left volar forearm       | forearm              | Skin         | M1              | day 2 | swab w/ sterile saline | transplant | disinfect./inoc. with tongue from same-sex other (4hrs)   |
| 739 | M124H5   | 1437         | forehead                 | forehead             | Skin         | M1              | day 2 | swab w/ sterile saline | transplant | disinfect./inoc. with forearm from self (4hrs)            |
| 740 | M124H6   | 1419         | forehead                 | forehead             | Skin         | M1              | day 2 | swab w/ sterile saline | transplant | disinfect./inoc. with forearm from same-sex other (4hrs)  |
| 741 | M124H7   | 1264         | forehead                 | forehead             | Skin         | M1              | day 2 | swab w/ sterile saline | transplant | disinfect./inoc. with tongue from self (4hrs)             |
| 742 | M124H8   | 1192         | forehead                 | forehead             | Skin         | M1              | day 2 | swab w/ sterile saline | transplant | disinfect./inoc. with tongue from same-sex other (4hrs)   |
| 743 | M128A1   | 893          | left volar forearm       | forearm              | Skin         | M1              | day 2 | swab w/ sterile saline | transplant | disinfect./inoc. with forehead from self (8hrs)           |
| 744 | M128A2   | 1292         | left volar forearm       | forearm              | Skin         | M1              | day 2 | swab w/ sterile saline | transplant | disinfect./inoc. with forehead from same-sex other (8hrs) |
| 745 | M128A3   | 1182         | left volar forearm       | forearm              | Skin         | M1              | day 2 | swab w/ sterile saline | transplant | disinfect./inoc. with tongue from self (8hrs)             |
| 746 | M128A4   | 1065         | left volar forearm       | forearm              | Skin         | M1              | day 2 | swab w/ sterile saline | transplant | disinfect./inoc. with tongue from same-sex other (8hrs)   |
| 747 | M128H5   | 1356         | forehead                 | forehead             | Skin         | M1              | day 2 | swab w/ sterile saline | transplant | disinfect./inoc. with forearm from self (8hrs)            |
| 748 | M128H6   | 1444         | forehead                 | forehead             | Skin         | M1              | day 2 | swab w/ sterile saline | transplant | disinfect./inoc. with forearm from same-sex other (8hrs)  |
| 749 | M128H7   | 1305         | forehead                 | forehead             | Skin         | M1              | day 2 | swab w/ sterile saline | transplant | disinfect./inoc. with tongue from self (8hrs)             |
| 750 | M128H8   | 1199         | forehead                 | forehead             | Skin         | M1              | day 2 | swab w/ sterile saline | transplant | disinfect./inoc. with tongue from same-sex other (8hrs)   |
| 751 | M410A1   | 1374         | left volar forearm       | forearm              | Skin         | M4              | day 1 | swab w/ sterile saline | transplant | none                                                      |
| 752 | M410A2   | 773          | left volar forearm       | forearm              | Skin         | M4              | day 1 | swab w/ sterile saline | transplant | none                                                      |
| 753 | M410A3   | 1406         | left volar forearm       | forearm              | Skin         | M4              | day 1 | swab w/ sterile saline | transplant | none                                                      |
| 754 | M410A4   | 1313         | left volar forearm       | forearm              | Skin         | M4              | day 1 | swab w/ sterile saline | transplant | none                                                      |
| 755 | M410H5   | 1373         | forehead                 | forehead             | Skin         | M4              | day 1 | swab w/ sterile saline | transplant | none                                                      |
| 756 | M410H6   | 1265         | forehead                 | forehead             | Skin         | M4              | day 1 | swab w/ sterile saline | transplant | none                                                      |

**Table S1.** Sample information

| #   | SampleID | No. of reads | Sample site (anatomical) | Sample site (common) | Body habitat | Host sex, indiv | Day   | Sample method          | Study      | Treatment                                                 |
|-----|----------|--------------|--------------------------|----------------------|--------------|-----------------|-------|------------------------|------------|-----------------------------------------------------------|
| 757 | M410H7   | 1334         | forehead                 | forehead             | Skin         | M4              | day 1 | swab w/ sterile saline | transplant | none                                                      |
| 758 | M410H8   | 1314         | forehead                 | forehead             | Skin         | M4              | day 1 | swab w/ sterile saline | transplant | none                                                      |
| 759 | M410T    | 772          | dorsal surface of tongue | tongue               | Oral cavity  | M4              | day 1 | swab                   | transplant | none                                                      |
| 760 | M412A1   | 1199         | left volar forearm       | forearm              | Skin         | M4              | day 1 | swab w/ sterile saline | transplant | disinfect./inoc. with forehead from self (2hrs)           |
| 761 | M412A2   | 1188         | left volar forearm       | forearm              | Skin         | M4              | day 1 | swab w/ sterile saline | transplant | disinfect./inoc. with forehead from same-sex other (2hrs) |
| 762 | M412A3   | 1160         | left volar forearm       | forearm              | Skin         | M4              | day 1 | swab w/ sterile saline | transplant | disinfect./inoc. with tongue from self (2hrs)             |
| 763 | M412A4   | 1632         | left volar forearm       | forearm              | Skin         | M4              | day 1 | swab w/ sterile saline | transplant | disinfect./inoc. with tongue from same-sex other (2hrs)   |
| 764 | M412H5   | 1400         | forehead                 | forehead             | Skin         | M4              | day 1 | swab w/ sterile saline | transplant | disinfect./inoc. with forearm from self (2hrs)            |
| 765 | M412H6   | 1269         | forehead                 | forehead             | Skin         | M4              | day 1 | swab w/ sterile saline | transplant | disinfect./inoc. with forearm from same-sex other (2hrs)  |
| 766 | M412H7   | 1299         | forehead                 | forehead             | Skin         | M4              | day 1 | swab w/ sterile saline | transplant | disinfect./inoc. with tongue from self (2hrs)             |
| 767 | M412H8   | 1284         | forehead                 | forehead             | Skin         | M4              | day 1 | swab w/ sterile saline | transplant | disinfect./inoc. with tongue from same-sex other (2hrs)   |
| 768 | M414A1   | 1265         | left volar forearm       | forearm              | Skin         | M4              | day 1 | swab w/ sterile saline | transplant | disinfect./inoc. with forehead from self (4hrs)           |
| 769 | M414A2   | 1191         | left volar forearm       | forearm              | Skin         | M4              | day 1 | swab w/ sterile saline | transplant | disinfect./inoc. with forehead from same-sex other (4hrs) |
| 770 | M414A3   | 1091         | left volar forearm       | forearm              | Skin         | M4              | day 1 | swab w/ sterile saline | transplant | disinfect./inoc. with tongue from self (4hrs)             |
| 771 | M414A4   | 1234         | left volar forearm       | forearm              | Skin         | M4              | day 1 | swab w/ sterile saline | transplant | disinfect./inoc. with tongue from same-sex other (4hrs)   |
| 772 | M414H5   | 1445         | forehead                 | forehead             | Skin         | M4              | day 1 | swab w/ sterile saline | transplant | disinfect./inoc. with forearm from self (4hrs)            |
| 773 | M414H6   | 1495         | forehead                 | forehead             | Skin         | M4              | day 1 | swab w/ sterile saline | transplant | disinfect./inoc. with forearm from same-sex other (4hrs)  |
| 774 | M414H7   | 1223         | forehead                 | forehead             | Skin         | M4              | day 1 | swab w/ sterile saline | transplant | disinfect./inoc. with tongue from self (4hrs)             |
| 775 | M414H8   | 1346         | forehead                 | forehead             | Skin         | M4              | day 1 | swab w/ sterile saline | transplant | disinfect./inoc. with tongue from same-sex other (4hrs)   |
| 776 | M418A1   | 1258         | left volar forearm       | forearm              | Skin         | M4              | day 1 | swab w/ sterile saline | transplant | disinfect./inoc. with forehead from self (8hrs)           |
| 777 | M418A2   | 1123         | left volar forearm       | forearm              | Skin         | M4              | day 1 | swab w/ sterile saline | transplant | disinfect./inoc. with forehead from same-sex other (8hrs) |
| 778 | M418A3   | 1278         | left volar forearm       | forearm              | Skin         | M4              | day 1 | swab w/ sterile saline | transplant | disinfect./inoc. with tongue from self (8hrs)             |
| 779 | M418A4   | 1247         | left volar forearm       | forearm              | Skin         | M4              | day 1 | swab w/ sterile saline | transplant | disinfect./inoc. with tongue from same-sex other (8hrs)   |
| 780 | M418H5   | 1385         | forehead                 | forehead             | Skin         | M4              | day 1 | swab w/ sterile saline | transplant | disinfect./inoc. with forearm from self (8hrs)            |
| 781 | M418H6   | 1620         | forehead                 | forehead             | Skin         | M4              | day 1 | swab w/ sterile saline | transplant | disinfect./inoc. with forearm from same-sex other (8hrs)  |
| 782 | M418H7   | 1399         | forehead                 | forehead             | Skin         | M4              | day 1 | swab w/ sterile saline | transplant | disinfect./inoc. with tongue from self (8hrs)             |
| 783 | M418H8   | 1367         | forehead                 | forehead             | Skin         | M4              | day 1 | swab w/ sterile saline | transplant | disinfect./inoc. with tongue from same-sex other (8hrs)   |
| 784 | M420A1   | 696          | left volar forearm       | forearm              | Skin         | M4              | day 2 | swab w/ sterile saline | transplant | none                                                      |
| 785 | M420A2   | 1237         | left volar forearm       | forearm              | Skin         | M4              | day 2 | swab w/ sterile saline | transplant | none                                                      |
| 786 | M420A3   | 1306         | left volar forearm       | forearm              | Skin         | M4              | day 2 | swab w/ sterile saline | transplant | none                                                      |
| 787 | M420A4   | 1420         | left volar forearm       | forearm              | Skin         | M4              | day 2 | swab w/ sterile saline | transplant | none                                                      |
| 788 | M420H5   | 1420         | forehead                 | forehead             | Skin         | M4              | day 2 | swab w/ sterile saline | transplant | none                                                      |
| 789 | M420H6   | 1454         | forehead                 | forehead             | Skin         | M4              | day 2 | swab w/ sterile saline | transplant | none                                                      |
| 790 | M420H7   | 1479         | forehead                 | forehead             | Skin         | M4              | day 2 | swab w/ sterile saline | transplant | none                                                      |
| 791 | M420H8   | 1551         | forehead                 | forehead             | Skin         | M4              | day 2 | swab w/ sterile saline | transplant | none                                                      |
| 792 | M420T    | 948          | dorsal surface of tongue | tongue               | Oral cavity  | M4              | day 2 | swab                   | transplant | none                                                      |

**Table S1.** Sample information

| #   | SampleID | No. of reads     | Sample site (anatomical)                | Sample site (common) | Body habitat | Host sex, indiv | Day   | Sample method          | Study      | Treatment                                                 |
|-----|----------|------------------|-----------------------------------------|----------------------|--------------|-----------------|-------|------------------------|------------|-----------------------------------------------------------|
| 793 | M422A1   | 1314             | left volar forearm                      | forearm              | Skin         | M4              | day 2 | swab w/ sterile saline | transplant | disinfect./inoc. with forehead from self (2hrs)           |
| 794 | M422A2   | 1249             | left volar forearm                      | forearm              | Skin         | M4              | day 2 | swab w/ sterile saline | transplant | disinfect./inoc. with forehead from same-sex other (2hrs) |
| 795 | M422A3   | 1478             | left volar forearm                      | forearm              | Skin         | M4              | day 2 | swab w/ sterile saline | transplant | disinfect./inoc. with tongue from self (2hrs)             |
| 796 | M422A4   | 1450             | left volar forearm                      | forearm              | Skin         | M4              | day 2 | swab w/ sterile saline | transplant | disinfect./inoc. with tongue from same-sex other (2hrs)   |
| 797 | M422H5   | 1476             | forehead                                | forehead             | Skin         | M4              | day 2 | swab w/ sterile saline | transplant | disinfect./inoc. with forearm from self (2hrs)            |
| 798 | M422H6   | 1818             | forehead                                | forehead             | Skin         | M4              | day 2 | swab w/ sterile saline | transplant | disinfect./inoc. with forearm from same-sex other (2hrs)  |
| 799 | M422H7   | 1446             | forehead                                | forehead             | Skin         | M4              | day 2 | swab w/ sterile saline | transplant | disinfect./inoc. with tongue from self (2hrs)             |
| 800 | M422H8   | 1521             | forehead                                | forehead             | Skin         | M4              | day 2 | swab w/ sterile saline | transplant | disinfect./inoc. with tongue from same-sex other (2hrs)   |
| 801 | M424A1   | 1401             | left volar forearm                      | forearm              | Skin         | M4              | day 2 | swab w/ sterile saline | transplant | disinfect./inoc. with forehead from self (4hrs)           |
| 802 | M424A2   | 1185             | left volar forearm                      | forearm              | Skin         | M4              | day 2 | swab w/ sterile saline | transplant | disinfect./inoc. with forehead from same-sex other (4hrs) |
| 803 | M424A3   | 1255             | left volar forearm                      | forearm              | Skin         | M4              | day 2 | swab w/ sterile saline | transplant | disinfect./inoc. with tongue from self (4hrs)             |
| 804 | M424H5   | 1522             | forehead                                | forehead             | Skin         | M4              | day 2 | swab w/ sterile saline | transplant | disinfect./inoc. with forearm from self (4hrs)            |
| 805 | M424H6   | 1460             | forehead                                | forehead             | Skin         | M4              | day 2 | swab w/ sterile saline | transplant | disinfect./inoc. with forearm from same-sex other (4hrs)  |
| 806 | M424H7   | 1458             | forehead                                | forehead             | Skin         | M4              | day 2 | swab w/ sterile saline | transplant | disinfect./inoc. with tongue from self (4hrs)             |
| 807 | M424H8   | 1379             | forehead                                | forehead             | Skin         | M4              | day 2 | swab w/ sterile saline | transplant | disinfect./inoc. with tongue from same-sex other (4hrs)   |
| 808 | M428A1   | 1238             | left volar forearm                      | forearm              | Skin         | M4              | day 2 | swab w/ sterile saline | transplant | disinfect./inoc. with forehead from self (8hrs)           |
| 809 | M428A2   | 1154             | left volar forearm                      | forearm              | Skin         | M4              | day 2 | swab w/ sterile saline | transplant | disinfect./inoc. with forehead from same-sex other (8hrs) |
| 810 | M428A3   | 1239             | left volar forearm                      | forearm              | Skin         | M4              | day 2 | swab w/ sterile saline | transplant | disinfect./inoc. with tongue from self (8hrs)             |
| 811 | M428A4   | 1401             | left volar forearm                      | forearm              | Skin         | M4              | day 2 | swab w/ sterile saline | transplant | disinfect./inoc. with tongue from same-sex other (8hrs)   |
| 812 | M428H5   | 1617             | forehead                                | forehead             | Skin         | M4              | day 2 | swab w/ sterile saline | transplant | disinfect./inoc. with forearm from self (8hrs)            |
| 813 | M428H6   | 1700             | forehead                                | forehead             | Skin         | M4              | day 2 | swab w/ sterile saline | transplant | disinfect./inoc. with forearm from same-sex other (8hrs)  |
| 814 | M428H7   | 1481             | forehead                                | forehead             | Skin         | M4              | day 2 | swab w/ sterile saline | transplant | disinfect./inoc. with tongue from self (8hrs)             |
| 815 | M428H8   | 1470             | forehead                                | forehead             | Skin         | M4              | day 2 | swab w/ sterile saline | transplant | disinfect./inoc. with tongue from same-sex other (8hrs)   |
|     |          | <b>1,071,515</b> | <b>Total no. of sequences</b>           |                      |              |                 |       |                        |            |                                                           |
|     |          | <b>1,315</b>     | <b>Mean no. of sequences per sample</b> |                      |              |                 |       |                        |            |                                                           |
|     |          | <b>420</b>       | <b>SD no. of sequences per sample</b>   |                      |              |                 |       |                        |            |                                                           |

### Supplemental References

- S1. L. C. Paulino, C. H. Tseng, B. E. Strober, M. J. Blaser, *J. Clin. Microbiol.* **44**, 2933 (2006).
- S2. N. Fierer, M. Hamady, C. L. Lauber, R. Knight, *Proc. Natl. Acad. Sci. U.S.A.* **105**, 17994 (2008).
- S3. E. A. Grice et al., *Science* **324**, 1190 (2009).
- S4. P. B. Eckburg et al., *Science* **308**, 1635 (2005).
- S5. Z. Z. Liu, C. Lozupone, M. Hamady, F. D. Bushman, R. Knight, *Nucleic Acids Res.* **35** (2007).
- S6. M. Hamady, J. J. Walker, J. K. Harris, N. J. Gold, R. Knight, *Nature Methods* **5**, 235 (2008).
- S7. W. Z. Li, A. Godzik, *Bioinformatics* **22**, 1658 (2006).
- S8. T. Z. DeSantis et al., *Nucleic Acids Res.* **34**, W394 (2006).
- S9. T. Z. DeSantis et al., *Appl. Environ. Microbiol.* **72**, 5069 (2006).
- S10. M. N. Price, P. S. Dehal, A. P. Arkin, *Mol. Biol. Evol.* doi:10.1093/molbev/msp077 (2009).
- S11. Q. Wang, G. M. Garrity, J. M. Tiedje, J. R. Cole, *Appl. Environ. Microbiol.* **73**, 5261 (2007).
- S12. D. P. Faith, *Biol. Conserv.* **61**, 1 (1992).
- S13. C. Lozupone, R. Knight, *Appl. Environ. Microbiol.* **71**, 8228 (2005).
- S14. C. A. Lozupone, M. Hamady, S. T. Kelley, R. Knight, *Appl. Environ. Microbiol.* **73**, 1576 (2007).
- S15. C. A. Lozupone, R. Knight, *FEMS Microbiol. Rev.* **32**, 557 (2008).
- S16. D. P. Faith, P. R. Minchin, L. Belbin, *Vegetatio* **69**, 57 (1987).
- S17. A. R. Quinlan, D. A. Stewart, M. P. Stromberg, G. T. Marth, *Nature Methods* **5**, 179 (2008).
- S18. M. Solmone et al., *J. Virol.* **83**, 1718 (2009).

- S19. G. Rozera et al., *Retrovirology* **6**, 15 (2009).
- S20. S. M. Huse, J. A. Huber, H. G. Morrison, M. L. Sogin, D. Mark Welch, *Genome Biol.* **8**, R143 (2007).
